# Supplementary material for: Design, synthesis, and antiviral activities of myricetin derivatives containing pyridazinone
Source: Royal Society of Chemistry journal article supplement (doi:10.1039/d3nj04902g), 2023-12-01
Supplement: d3nj04902g1.pdf [file d3nj04902g1.pdf]

1

## Supporting Information

2

### Design, synthesis, and antiviral activities of Myricetin

3

#### derivatives containing pyridazinone

4

Li Xing<sup>a</sup>, Youshan An<sup>a</sup>, Yishan Qin<sup>a</sup>, Hui Xin<sup>a</sup>, Tianyu Deng<sup>a</sup>, Kaini Meng<sup>a</sup>,

5

Da Liu<sup>\*,b</sup> Wei Xue<sup>\*,a</sup>

6

<sup>a</sup> National Key Laboratory of Green Pesticide, Key Laboratory of Green Pesticide and Agricultural

7

Bioengineering, Ministry of Education, Center for R&D of Fine Chemicals of Guizhou University,

8

Guiyang, 550025, China.

9

<sup>b</sup> Hunan Engineering Laboratory for Preparation Technology of Polyvinyl Alcohol (PVA) Fiber

10

Material, Huaihua University, Huaihua, Hunan, 418008, China.

11

\*Corresponding author:

12

E-mail: wxue@gzu.edu.cn (Wei Xue)<sup>a</sup>, Tel/Fax: 0086-0851-88292090.

13

E-mail: liuda@hhtc.edu.cn<sup>b</sup>

14 **1 Crystal characterization data**15 **Table 1** Crystal data of **A14** (CCDC: 2247966)

| <b>Compound</b>                                 | <b>A14</b>                                                     |
|-------------------------------------------------|----------------------------------------------------------------|
| <b>Sum Formula</b>                              | C <sub>34</sub> H <sub>35</sub> N <sub>2</sub> O <sub>10</sub> |
| <b>Formula Weight</b>                           | 631.64                                                         |
| <b>Temperature [K]</b>                          | 273.15                                                         |
| <b>Space group</b>                              | P2 <sub>1</sub> /c                                             |
| <b>Crystal system</b>                           | monoclinic                                                     |
| <b>a [Å]</b>                                    | 13.780(2)                                                      |
| <b>b [Å]</b>                                    | 13.421(2)                                                      |
| <b>c [Å]</b>                                    | 17.928(3)                                                      |
| <b>α [°]</b>                                    | 90                                                             |
| <b>β [°]</b>                                    | 112.60                                                         |
| <b>γ [°]</b>                                    | 90                                                             |
| <b>V[Å<sup>3</sup>]</b>                         | 3061.0(8)                                                      |
| <b>Color/shape</b>                              | Colorless/rodlike                                              |
| <b>Radiation [Å]</b>                            | MoKα (λ = 1.54178)                                             |
| <b>Z</b>                                        | 4                                                              |
| <b>Density (calculated) [mg/m<sup>3</sup>]</b>  | 1.371                                                          |
| <b>Absorption coefficient [mm<sup>-1</sup>]</b> | 0.845                                                          |
| <b>F(000)</b>                                   | 1332.0                                                         |
| <b>Theta Min-Max [°]</b>                        | 6.948 to 117.572                                               |
| <b>h,k,l</b>                                    | -15 ≤ h ≤ 15, -10 ≤ k ≤ 14, -18 ≤ l ≤ 17                       |
| <b>Measured reflections</b>                     | 15612                                                          |
| <b>Independent reflections</b>                  | 4182 [R <sub>int</sub> = 0.5297, R <sub>sigma</sub> = 0.3533]  |
| <b>Data/Restraints/Parameters</b>               | 4182/1/420                                                     |
| <b>Goodness-of-fit on F<sup>2</sup></b>         | 1.191                                                          |
| <b>Final R indices [I &gt; 2σ(I)]</b>           | R <sub>1</sub> = 0.1421, wR <sub>2</sub> = 0.3449              |
| <b>R indices (all data)</b>                     | R <sub>1</sub> = 0.2199, wR <sub>2</sub> = 0.4020              |

## 16 **2 biological activity testing**

17 The bioactivity of the target compounds against tobacco mosaic virus was tested using the half-  
18 leaf blotch assay as follows.

### 19 **2.1 Extraction of Tobacco mosaic virus (TMV)**

20 Three weeks after the virus was infiltrated in common cigarette, the leaves were taken and cut  
21 into pieces to remove the meridians, and placed in a mortar and pestle with liquid nitrogen to be  
22 finely ground and weighed; 0.2 mol/L phosphate buffer (pH 7.2, containing 1 % mercaptoethanol)  
23 was added according to the ratio of mass to volume of 1:1.5/1:2, stirred in an ice bath for 10 min,  
24 and then filtered through a double layer of gauze, and the volume of filtrate was retained and  
25 measured (primary extract); 8 % of *n*-butanol by volume was added into the primary extract, stirred  
26 in an ice bath for 20 min, and then centrifuged for 20 min (4 °C, 8000 rpm), and the supernatant was  
27 collected and measured. *n*-butanol by volume was added to the primary extract, stirred for 20 min  
28 in an ice bath and then centrifuged for 20 min (4 °C, 8000 rpm), the supernatant was collected and  
29 its volume was measured; NaCl and polyethylene glycol were added to the primary extract at 4 %  
30 of the volume of supernatant, stirred for 1 h in an ice bath and then centrifuged for 20 min (4 °C,  
31 8000 rpm), the precipitate was collected; homogenization was performed by adding 0.01 mol/L  
32 phosphate buffer, and then centrifuged for 20 min (4 °C, 8000 rpm), the precipitates were collected.  
33 The supernatant was collected by centrifugation for 20 min (4 °C, 8000 rpm). The purified virus  
34 was obtained by combining the supernatant three times.

### 35 **2.2 *In vivo* anti-TMV activity testing of target compounds**

#### 36 **2.2.1 Solution Configuration of Compounds to be Tested**

37 Accurately weigh 2 mg of the target compound, add 30  $\mu$ L DMSO to dissolve and then add 4  
38 mL of 1 % Tween water (Tween-80) to formulate a 500  $\mu$ g/mL solution.

#### 39 **2.2.2 Curative activity studies of target compounds against tobacco mosaic virus**

40 Select the same leaves of heartleaf tobacco, remove the top and keep 3-5 healthy leaves,  
41 sprinkle a small amount of uniform adamantine on each leaf, inoculate all the leaves with virus by  
42 using a row pen dipped in 500 times diluted TMV solution, wait for the virus to infest for 30 min to  
43 rinse off the adamantine on the surface of the leaves, naturally dry the water, dip a brush into the  
44 solution and evenly apply it on the right side of the leaf, and the left leaf was coated with DMSO as  
45 a blank control. The treated tobacco plants were placed in the artificial intelligence climate

46 greenhouse for 2-3 d. After the spots appeared on the leaves, the number of left and right sides were  
47 counted and the inhibition rate was calculated, and the experiment was repeated three times.

#### 48 2.2.2.1 Inhibitory rate calculation formula

$$49 \quad I = (L-R)/L \times 100\%$$

50 I: the inhibition rate;

51 L: the number of black spots on the left half of the leaf;

52 R: the number of black spots on the right half of the leaf.

#### 53 **2.2.3 Studies on the protective activity of target compounds against tobacco mosaic virus**

54 The heart leaves of the same leaves were selected, and 3-5 healthy leaves were retained after  
55 topping. The right leaves were evenly smeared with a brush with a concentration of 500  $\mu\text{g}/\text{mL}$ , and  
56 the left side was smeared with DMSO as a blank control. After 24 h, the left and right sides of the  
57 leaves were evenly spread with emery, and the left and right sides of the leaves were inoculated  
58 with 500 times diluted virus with a pencil. After waiting for 30 min, the emery was washed away  
59 and placed in the artificial intelligence climate greenhouse for 2-3 d. After the spots on the leaves,  
60 the number of left and right sides was counted, the inhibition rate was calculated (the calculation  
61 formula was the same as above), and the parallel test was carried out three times.

#### 62 **2.2.4 Studies on the passivating activity of target compounds against tobacco mosaic virus**

63 After removing the top, 3-5 healthy leaves were retained, and a small amount of emery was  
64 evenly sprinkled. 1 mL of TMV solution diluted 250 times was added to 1 mL of 500  $\mu\text{g}/\text{mL}$  solution  
65 to passivate 0.5 h. The right side of the leaf was inoculated with a row of pens, and the TMV solution  
66 diluted 500 times was inoculated on the left side of the leaf. After waiting for 30 min, the emery  
67 was washed away and placed in the artificial intelligence climate greenhouse for 2-3 d. After the  
68 spots on the leaves were counted, the number of left and right sides was counted, and the inhibition  
69 rate was calculated (the calculation formula was the same as above), and the parallel test was carried  
70 out three times.

#### 71 **2.2.5 Determination of EC<sub>50</sub> values of the target compounds against tobacco mosaic virus**

72 The compounds were successively prepared into solutions of 500, 250, 125, 62.5 and 31.25  
73  $\mu\text{g}/\text{mL}$ . According to the treatment and protection methods, the drugs were administered and the  
74 virus was inoculated. The number of spots was counted and the inhibition rate was calculated. The  
75 corresponding EC<sub>50</sub> value was calculated, and the parallel test was performed three times.

## 76 **3 Microscale thermophoresis (MST) experiment**

### 77 **3.1 Preparation of target compounds**

78 Weigh  $m$  (mg) =  $M$  (relative molecular mass)  $\times 4 \div 1000$  in a 200  $\mu\text{L}$  PE tube, dissolve it with  
79 100  $\mu\text{L}$  DMSO, take 10  $\mu\text{L}$  of the drug solution in a 200  $\mu\text{L}$  PE tube and add 190  $\mu\text{L}$  of SEC buffer  
80 solution, and this tube of the drug solution is called the mother liquor. The mother liquor was  
81 sequentially prepared into 16 specimens with concentration gradients of 10  $\mu\text{L}$  each.

### 82 **3.2 MST Test**

83 Add 10  $\mu\text{L}$  of TMV CP-labeled protein to each of the solutions 1-16, mix well, and there should  
84 be no air bubbles in the PE tube; inhale the specimen into a capillary tube and operate on a Monolith  
85 NT.115 instrument to determine the  $K_d$  values of the compounds and TMV CP and record them.

## 86 **4 Molecular docking experiments**

87 Molecular docking performs virtual screening of drugs by predicting affinity and binding  
88 patterns of drugs and proteins. Molecular docking was performed using LibDock in Discovery  
89 Studio (2019) and visualization analysis was done in this software. TMV-CP (PDB code: 1EI7) was  
90 obtained from the Protein Data Bank (PDB <https://www.rcsb.org>). All parameters were defaulted  
91 during the docking process.

## 92 **5 Determination of chlorophyll content**

93 Taking A26 as an example, the changes of chlorophyll content in tobacco leaves after treatment  
94 were determined. The CK group, TMV group, drug group and drug + TMV group were set up, and  
95 three parallel experiments were set up in each group. The operation steps are as follows :

### 96 **5.1 Tobacco handling and sampling**

97 The tobacco leaves with the same growth cycle were selected, and 5-6 leaves with the same  
98 shape and size were retained after topping. The liquid with a concentration of 500  $\mu\text{g}/\text{mL}$  was dipped  
99 in a brush and evenly applied to the tobacco leaves of the corresponding groups. The CK group was  
100 smeared with DMSO solution for the same operation. After 24 hours, the virus was inoculated. The  
101 leaf samples were collected at 1, 3, 5 and 7 d after inoculation, and the group markers were made.

### 102 **5.2 Determination of chlorophyll content**

103 The collected samples were removed from the meridians to retain the leaves, and 20 mg of  
104 each tobacco leaf was accurately weighed and ground into a mortar, and 2 mL of mixed solution  
105 (85 % ethanol : 85 % acetone = 1:1) was added. After rapid grinding, it was transferred to a 2 mL

106 centrifuge tube and incubated in the dark for 1 h. After centrifugation for 5 min (4 °C, 4000 rpm),  
107 the extract was used as a blank control, and the absorbance OD645 and OD663 at 645 and 663 nm  
108 were measured respectively.

### 109 5.3 Result calculation

110 5.3.1 The experimental results are calculated according to the following formula :

111 
$$\text{Ca (mg/L)} = 9.784 \text{ OD663} - 0.990 \text{ OD645}$$

112 
$$\text{Cb (mg/L)} = 21.426 \text{ OD645} - 4.650 \text{ OD663}$$

113 
$$\text{Ct (mg/L)} = \text{Ca} + \text{Cb} = 5.134 \text{ OD663} + 20.436 \text{ OD645}$$

114 
$$\text{Chlorophyll content (mg/g)} = \text{concentration (mg/L)} * \text{total extract (mL)} / \text{leaf weight (g)}$$

### 115 6 Determination of malondialdehyde content

116 The treatment of pre-tobacco leaves was the same as that of chlorophyll, and the collected  
117 samples were removed from the meridian, put into a mortar and pestle, and fully ground by adding  
118 liquid nitrogen. After grinding, the samples were put into 2 mL PE tubes and labeled, and then  
119 stored in a refrigerator at -80 °C. Later, the determination was carried out according to the  
120 instructions that came with the malondialdehyde assay kit.

### 121 7 <sup>1</sup>H NMR, <sup>13</sup>C NMR, <sup>19</sup>F NMR and HRMS spectrum of the title compounds

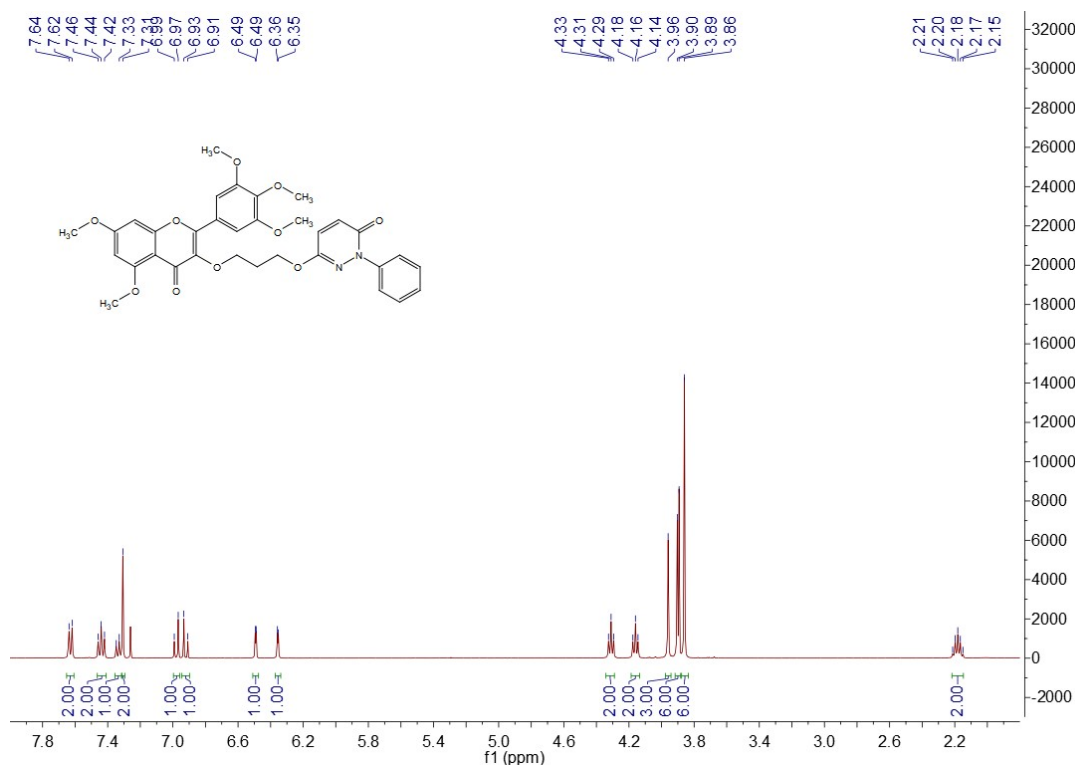

122

123

Fig. 1 <sup>1</sup>H NMR spectrum of A1

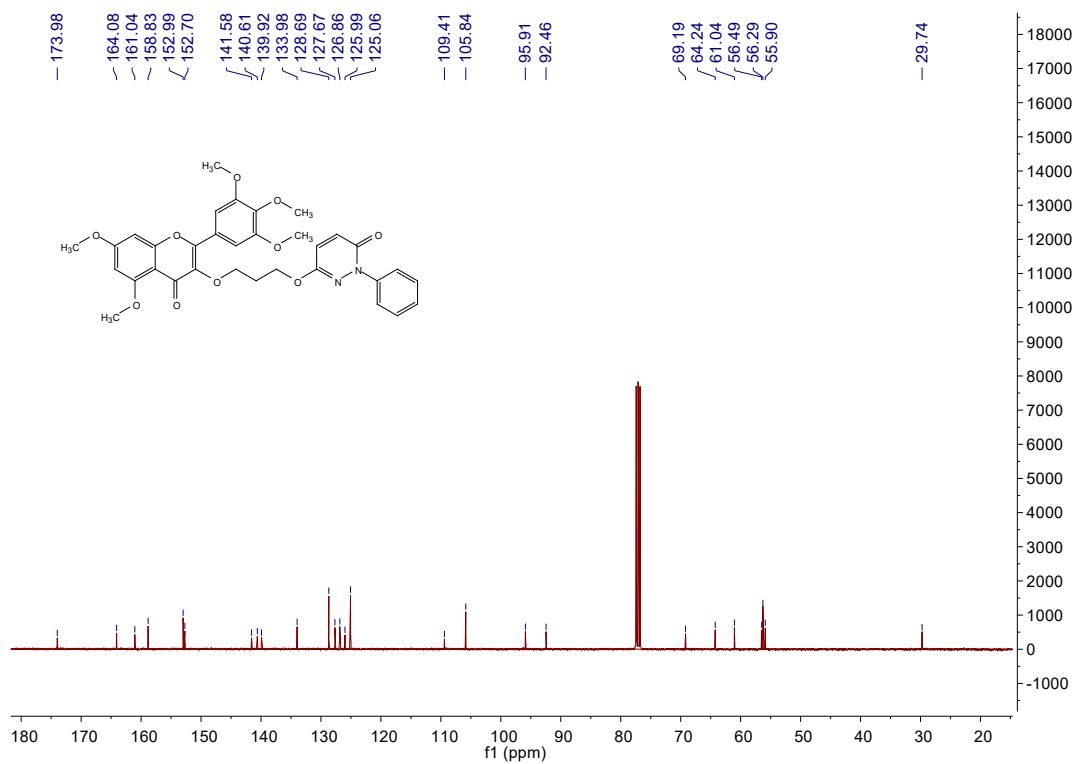

124

125

**Fig. 2** <sup>13</sup>C NMR spectrum of A1

05 #35 RT: 0.35 AV: 1 NL: 7.88E+006  
T: FTMS + p ESI Full ms [150.0000-2200.0000]

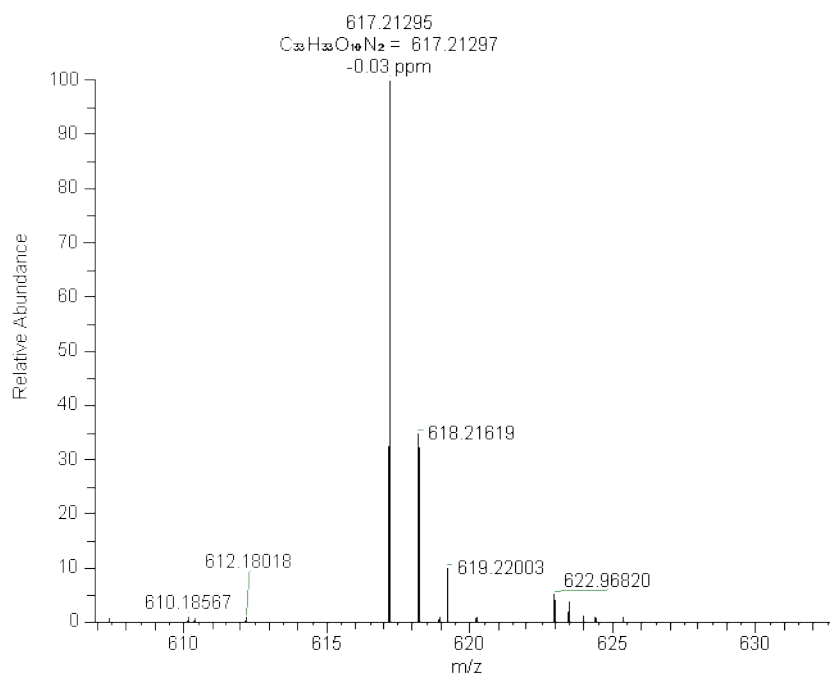

126

127

**Fig. 3** HRMS spectrum of A1

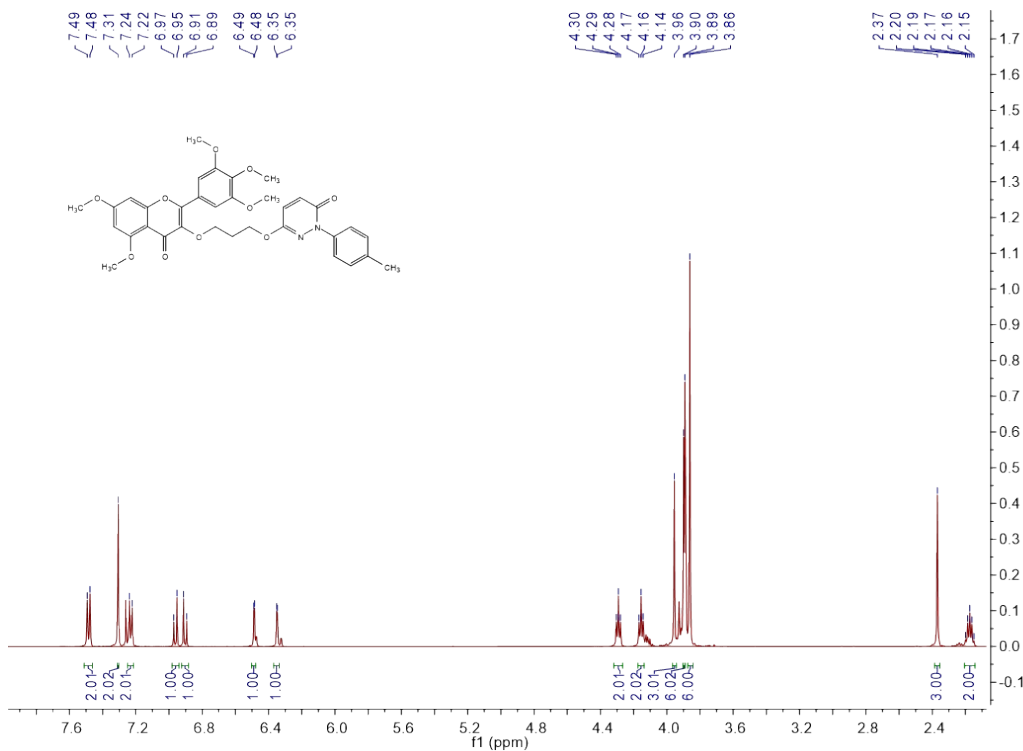

128

129

Fig. 4 <sup>1</sup>H NMR spectrum of A2

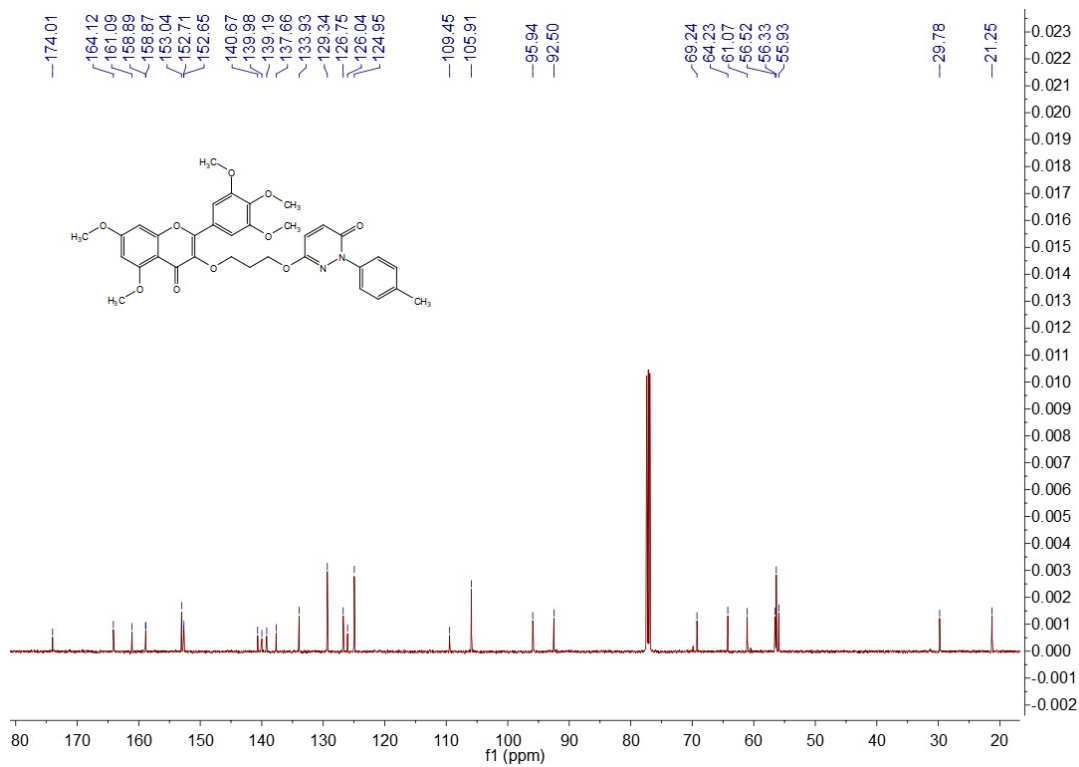

130

131

Fig. 5 <sup>13</sup>C NMR spectrum of A2



06 #41 RT: 0.41 AV: 1 NL: 6.74E+007  
T: FTMS + p ESI Full ms [150.0000-2200.0000]

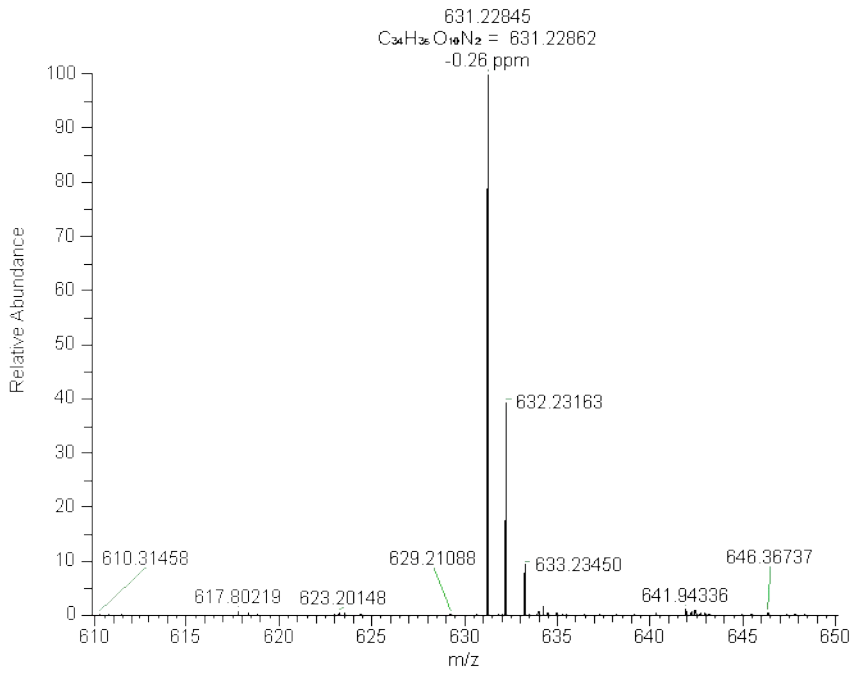

132

133

Fig. 6 HRMS spectrum of A2

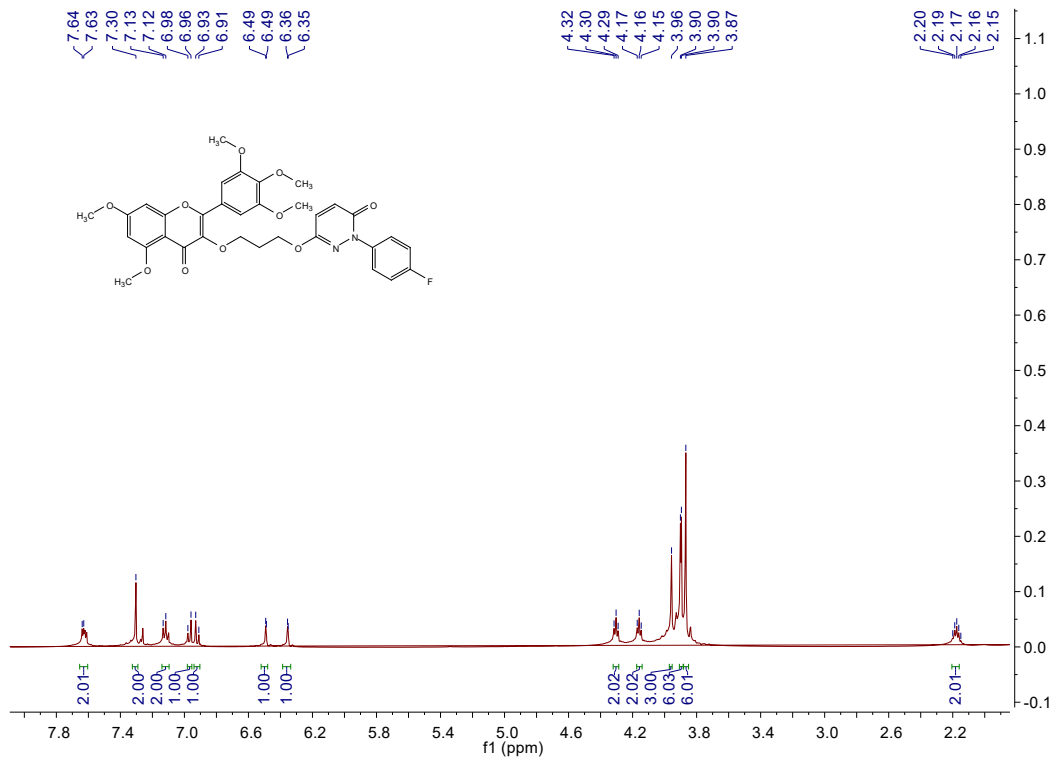

134

135

Fig. 7  $^1H$  NMR spectrum of A3

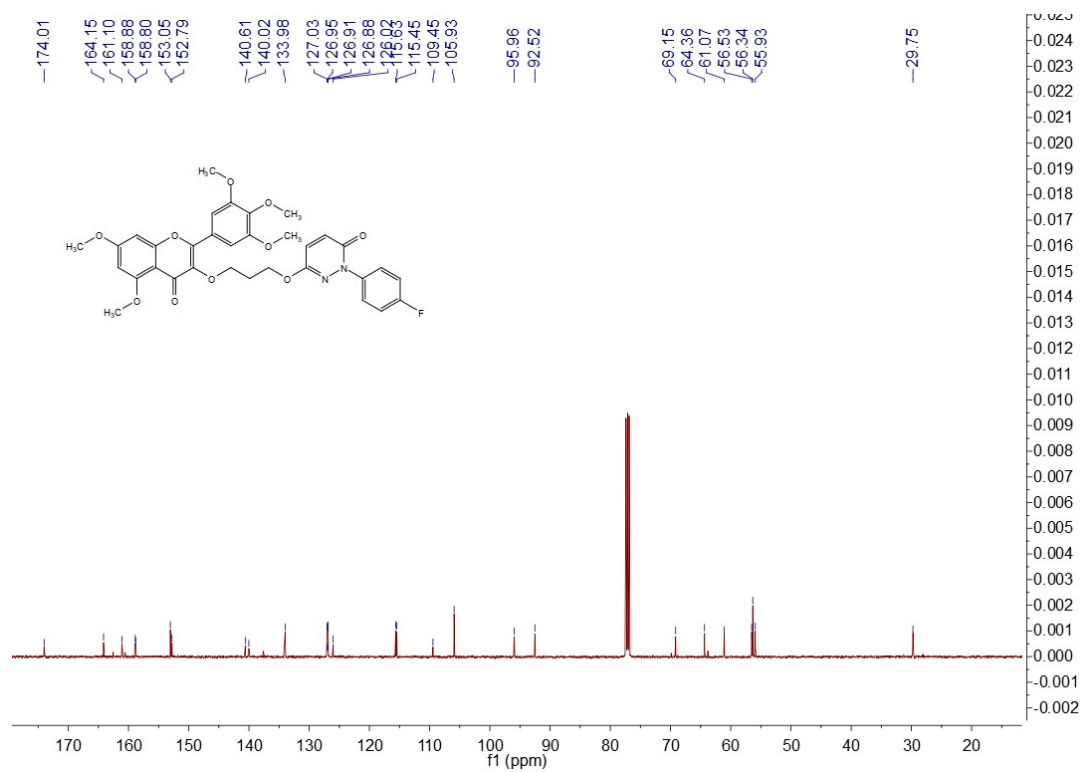

136

137

**Fig. 8** <sup>13</sup>C NMR spectrum of A3

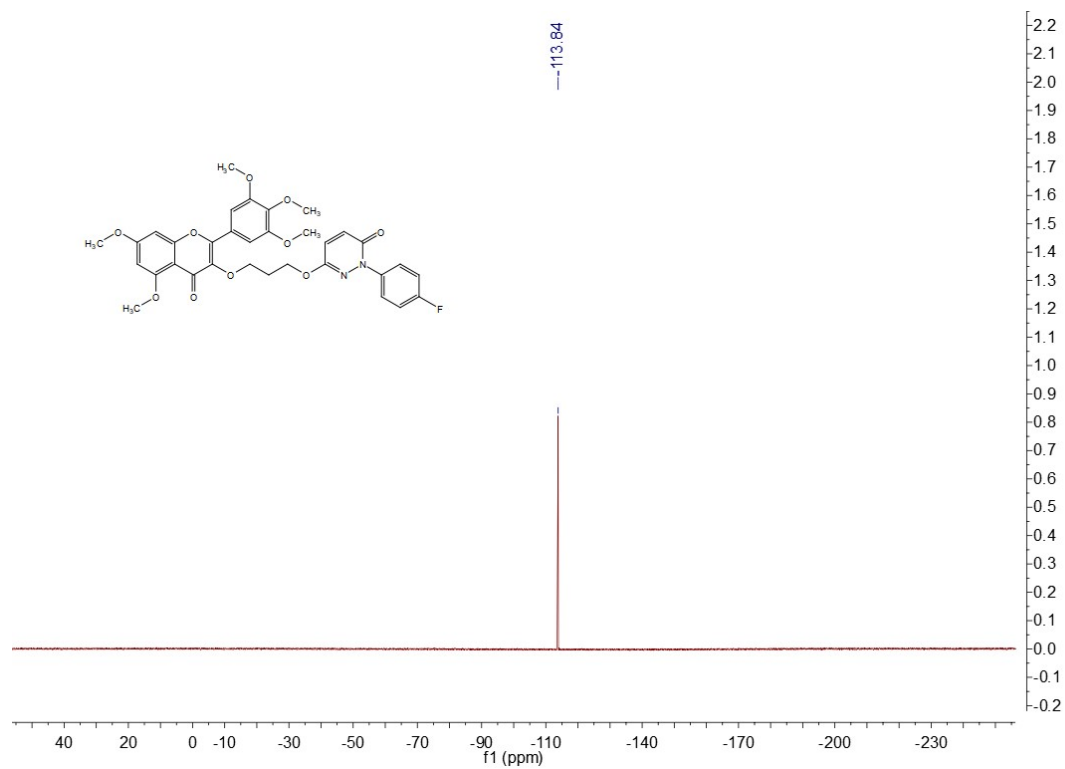

138

139

**Fig. 9** <sup>19</sup>F NMR spectrum of A3

07 #35 RT: 0.35 AV: 1 NL: 9.55E+006  
T: FTMS + p ESI Full ms [150.0000-2200.0000]

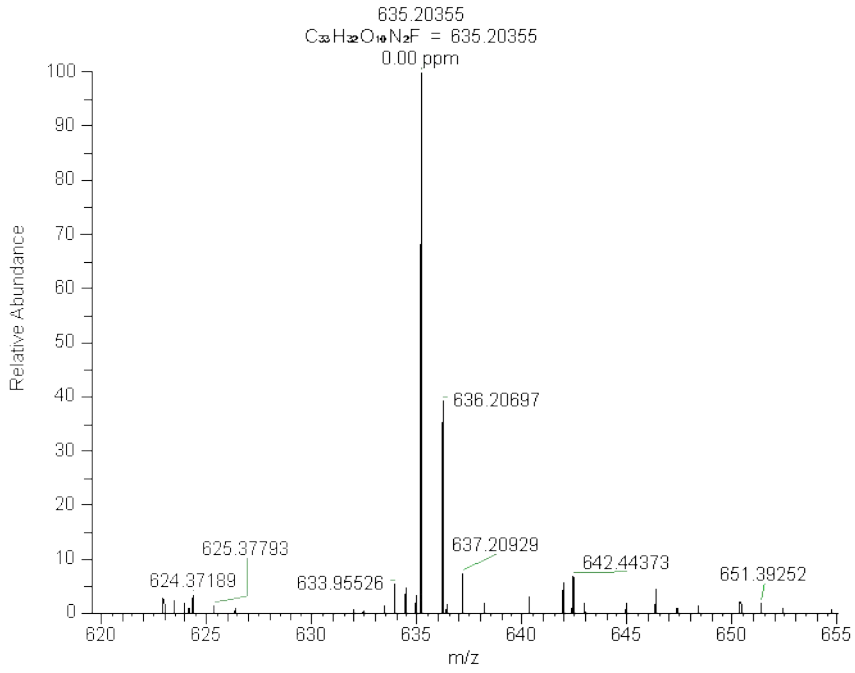

140

141

Fig. 10 HRMS spectrum of A3

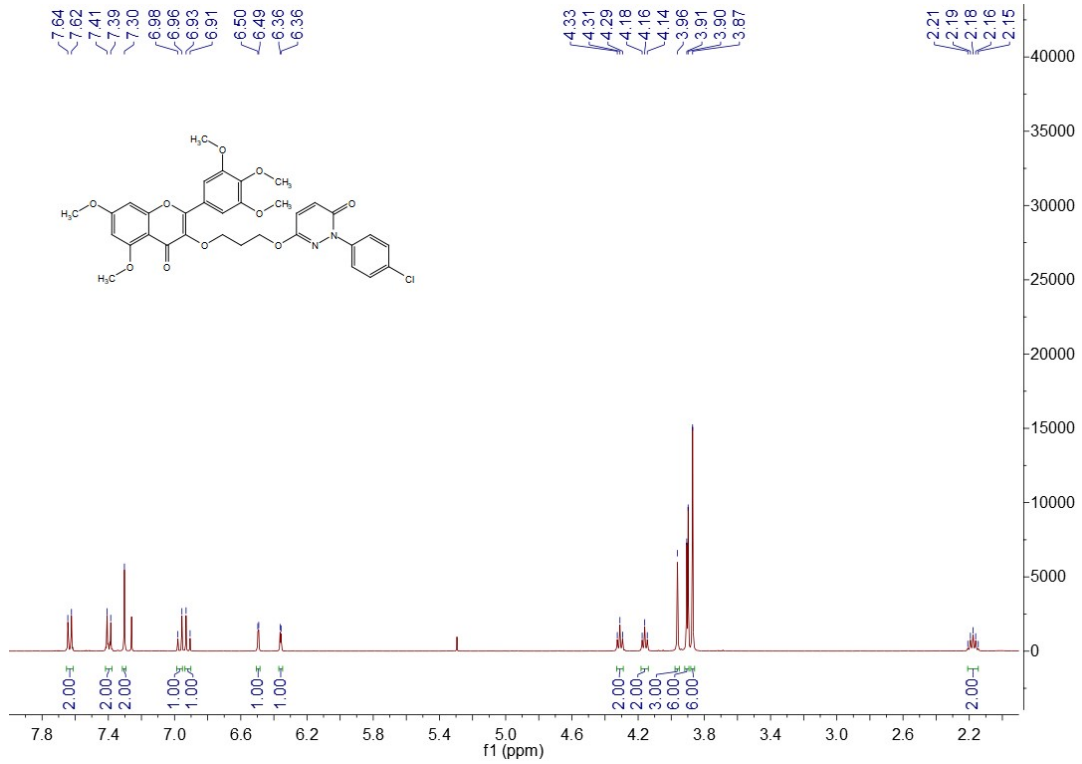

142

143

Fig. 11  $^1H$  NMR spectrum of A4

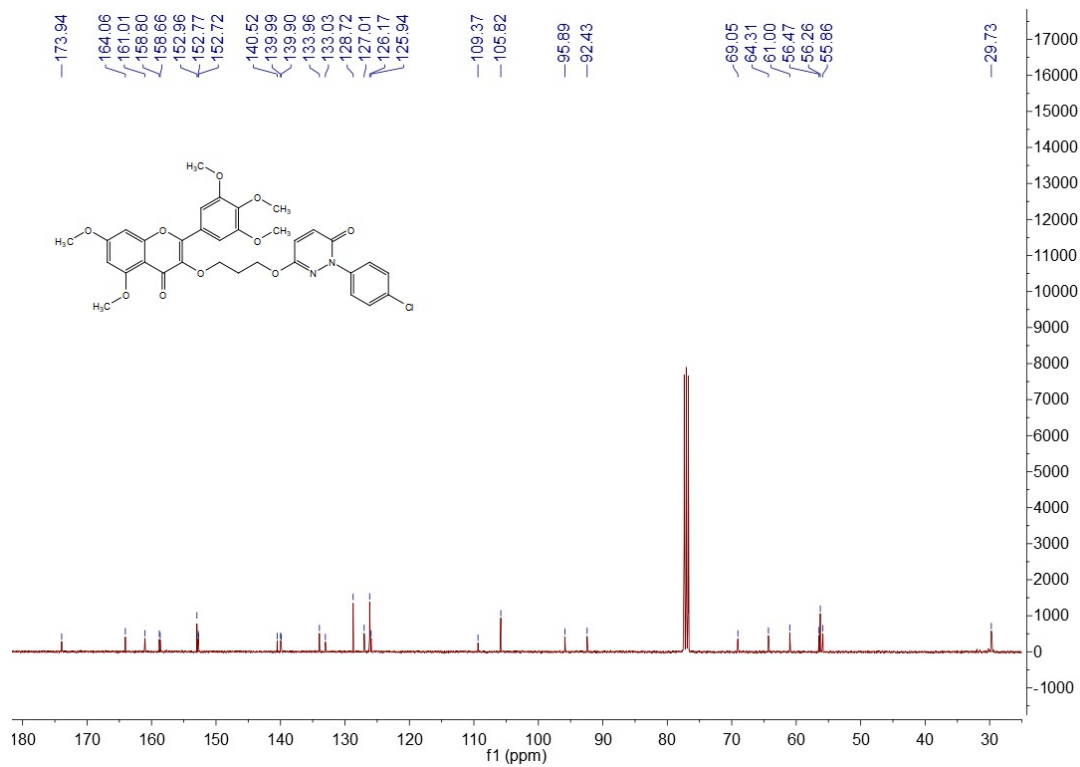

144

145

**Fig. 12** <sup>13</sup>C NMR spectrum of A4

08 #53 RT: 0.53 AV: 1 NL: 3.80E+007  
T: FTMS + p ESI Full ms [150.0000-2200.0000]

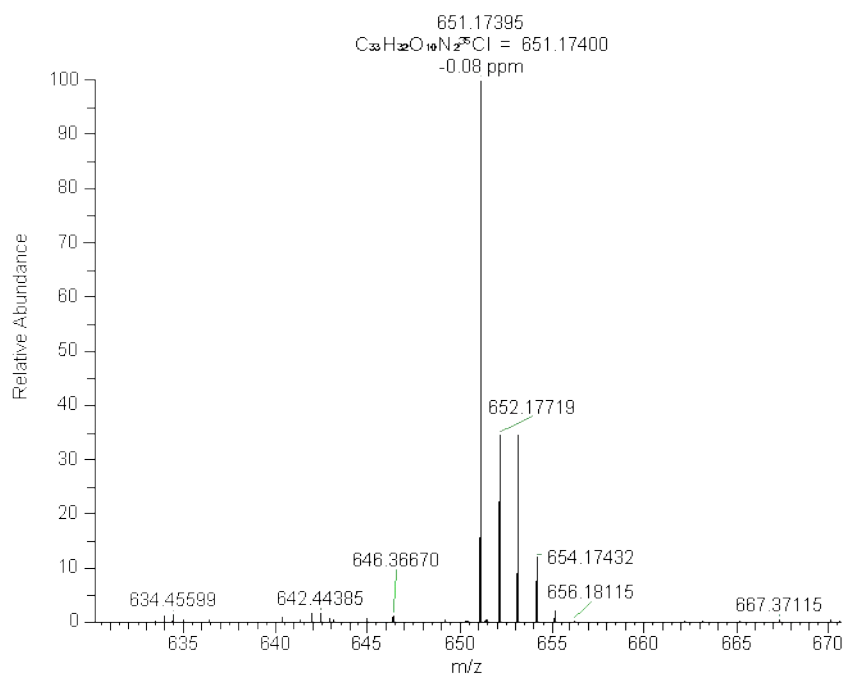

146

147

**Fig. 13** HRMS spectrum of A4

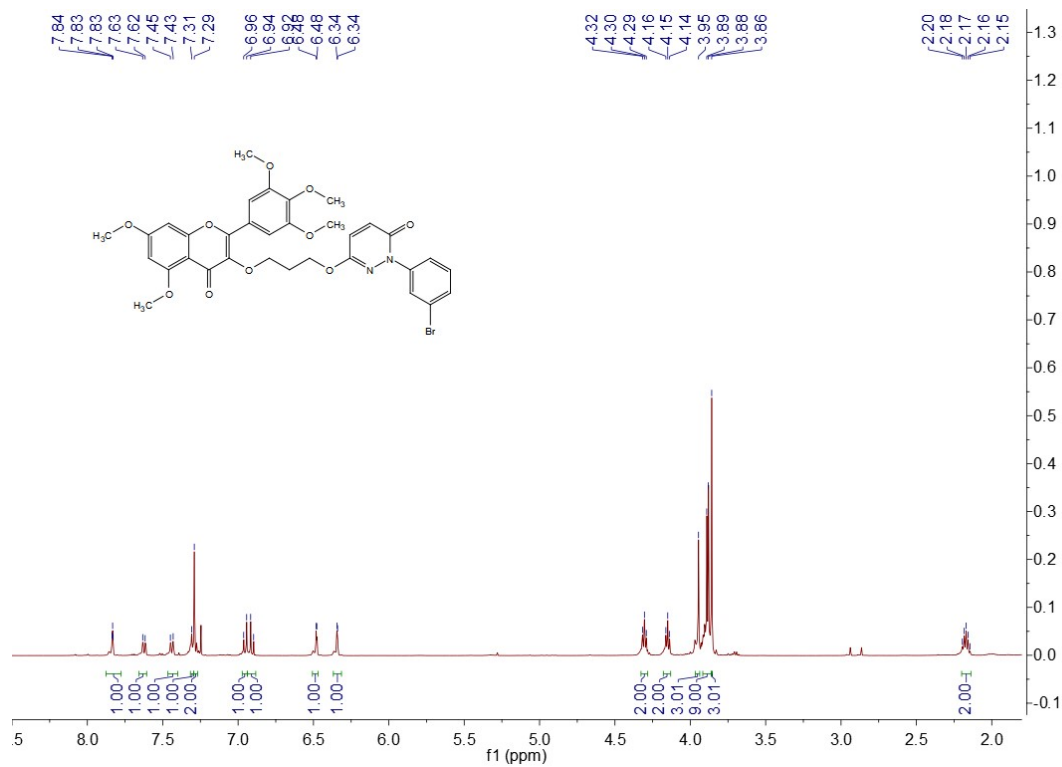

148

149

Fig. 14  $^1\text{H}$  NMR spectrum of A5

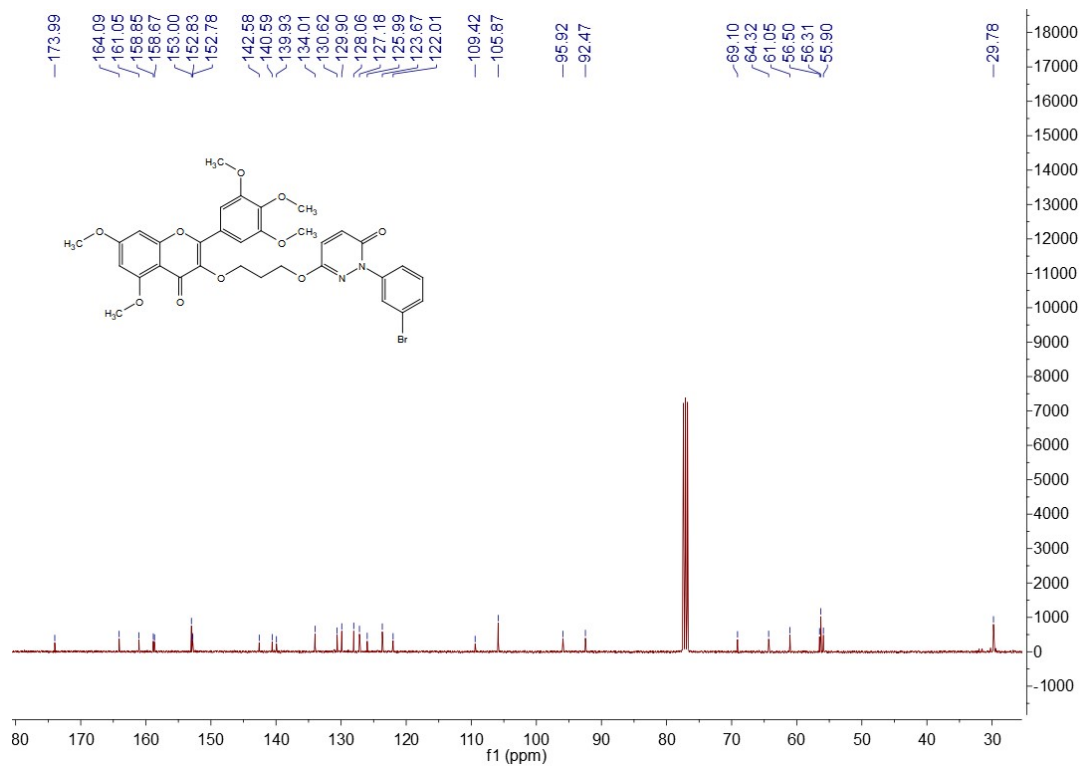

150

151

152

Fig. 15  $^{13}\text{C}$  NMR spectrum of A5

08 #47 RT: 0.47 AV: 1 NL: 1.51E+007  
T: FTMS + p ESI Full ms [150.0000-2200.0000]

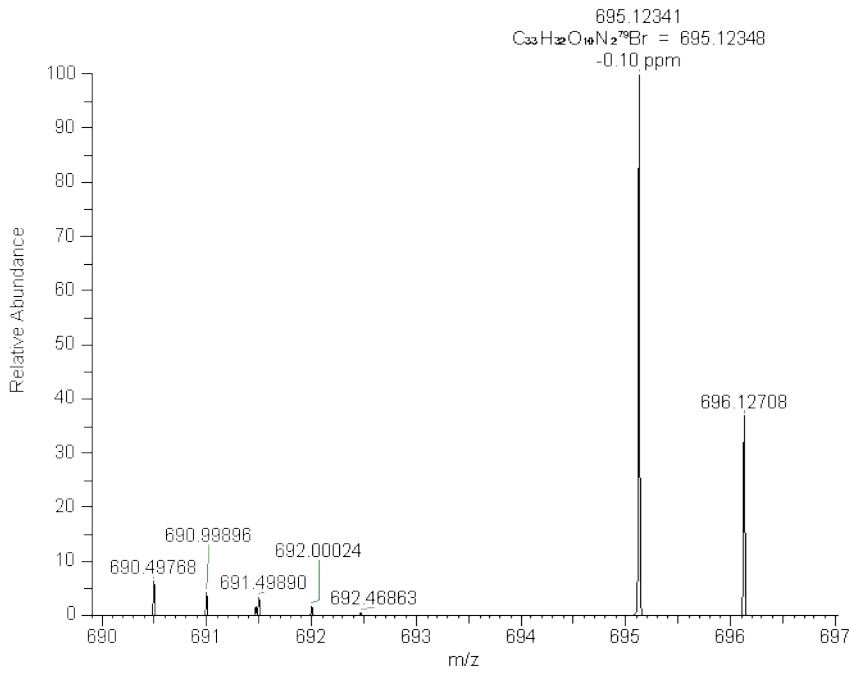

153

154

Fig. 16 HRMS spectrum of A5

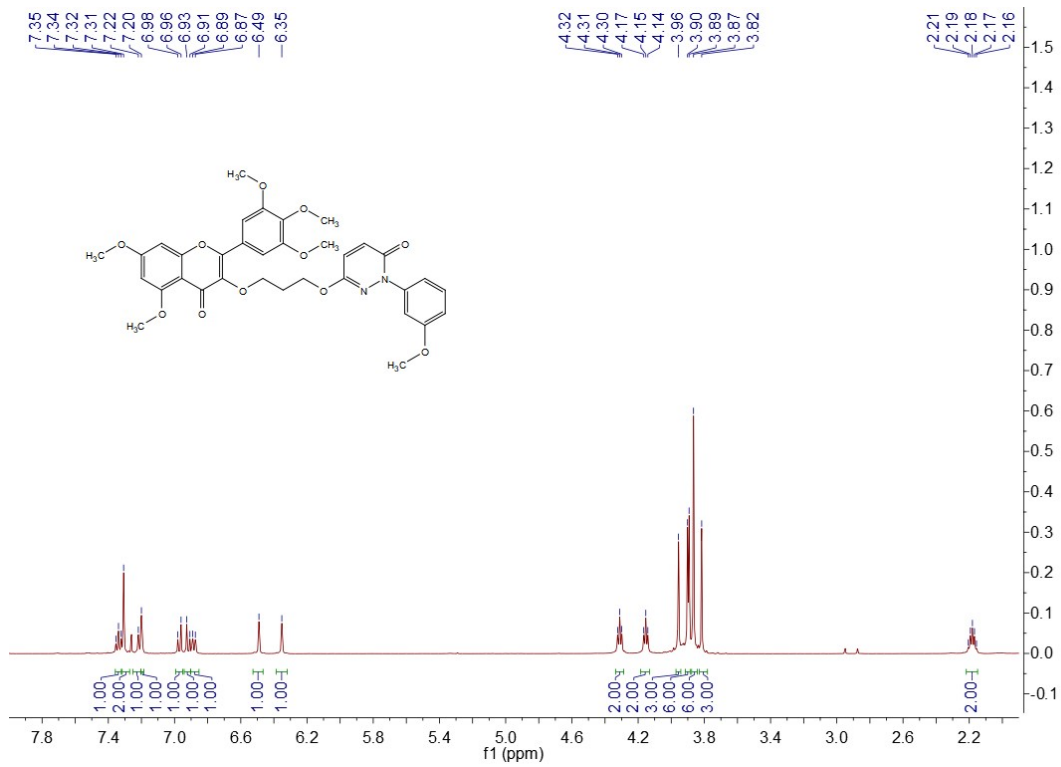

155

156

Fig. 17  $^1H$  NMR spectrum of A6

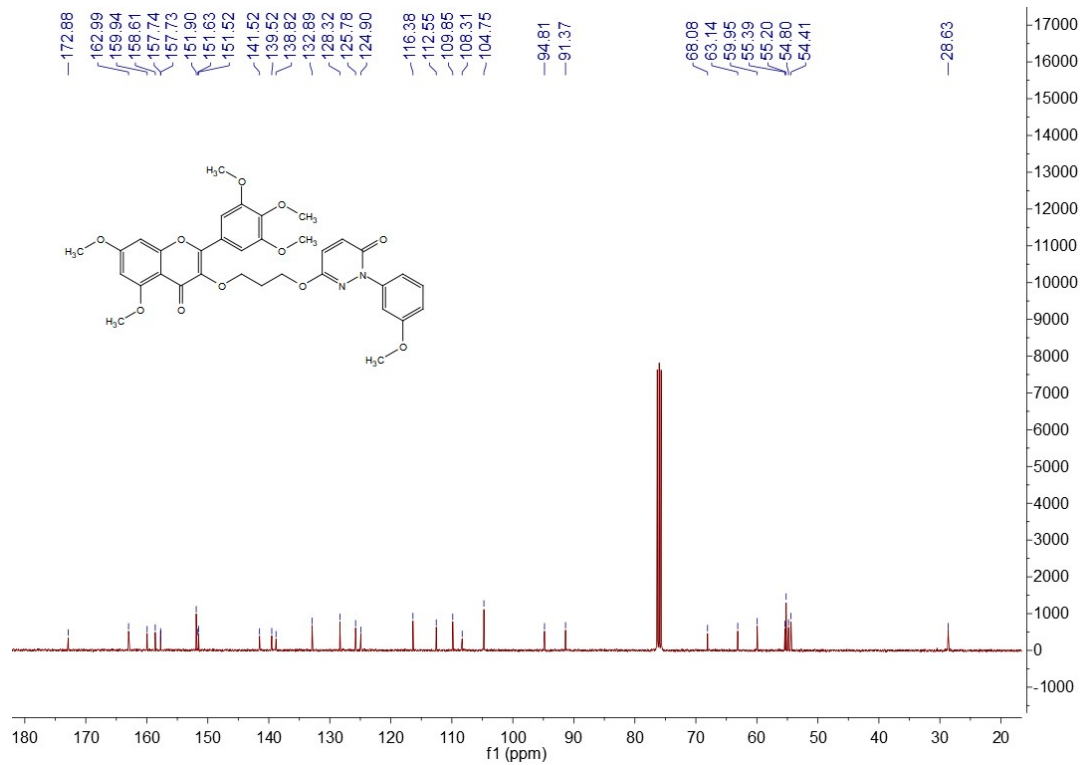

157

158

**Fig. 18**  $^{13}\text{C}$  NMR spectrum of A6

10 #41 RT: 0.41 AV: 1 NL: 2.33E+007  
T: FTMS + p ESI Full ms [150.0000-2200.0000]

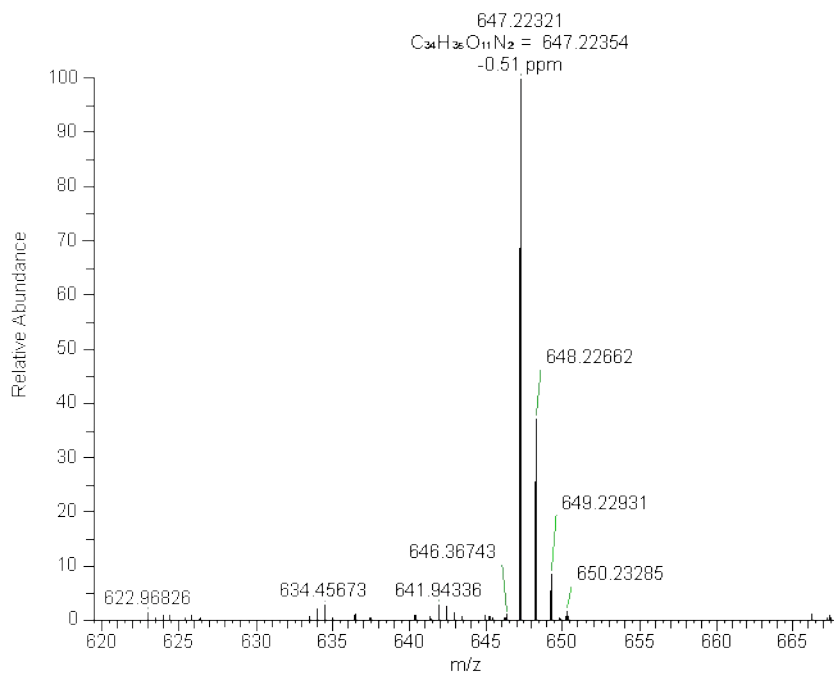

159

160

**Fig. 19** HRMS spectrum of A6

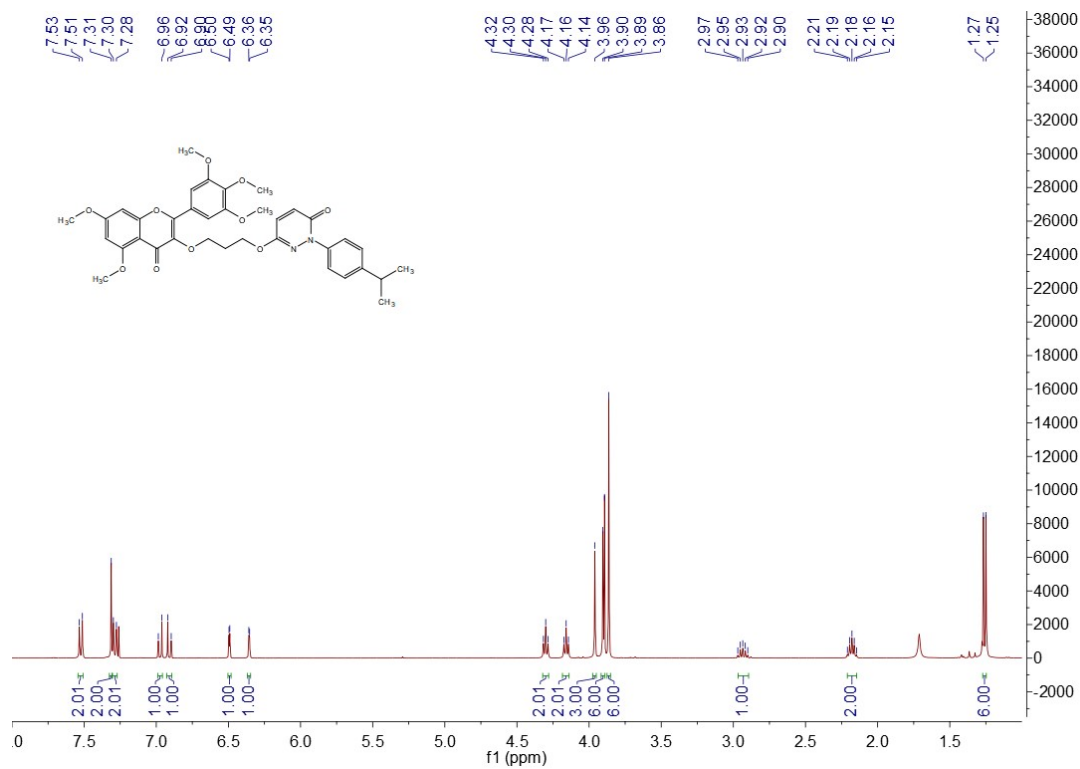

161

Fig. 20  $^1\text{H}$  NMR spectrum of A7

162

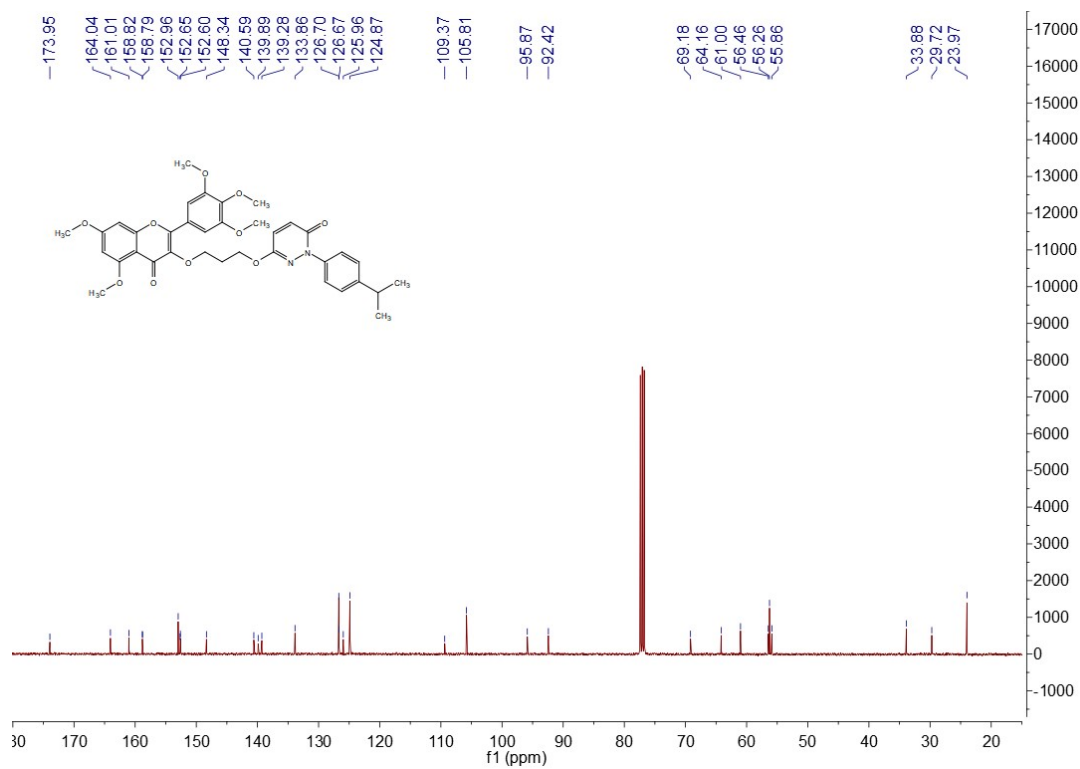

163

Fig. 21  $^{13}\text{C}$  NMR spectrum of A7

164



67 #67 RT: 0.66 AV: 1 NL: 2.45E+008  
T: FTMS + p ESI Full ms [100.0000-1300.0000]

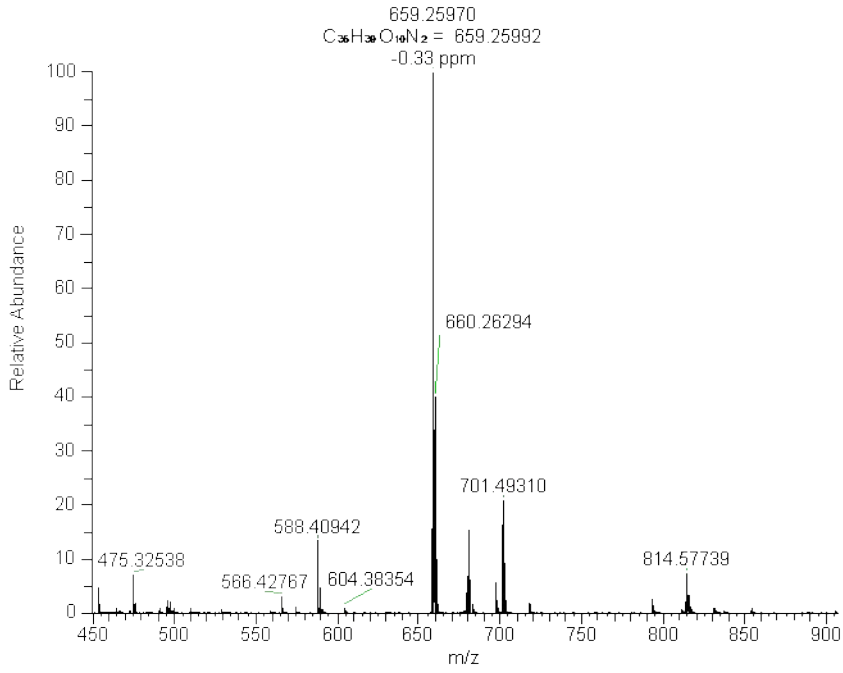

165

166

Fig. 22 HRMS spectrum of A7

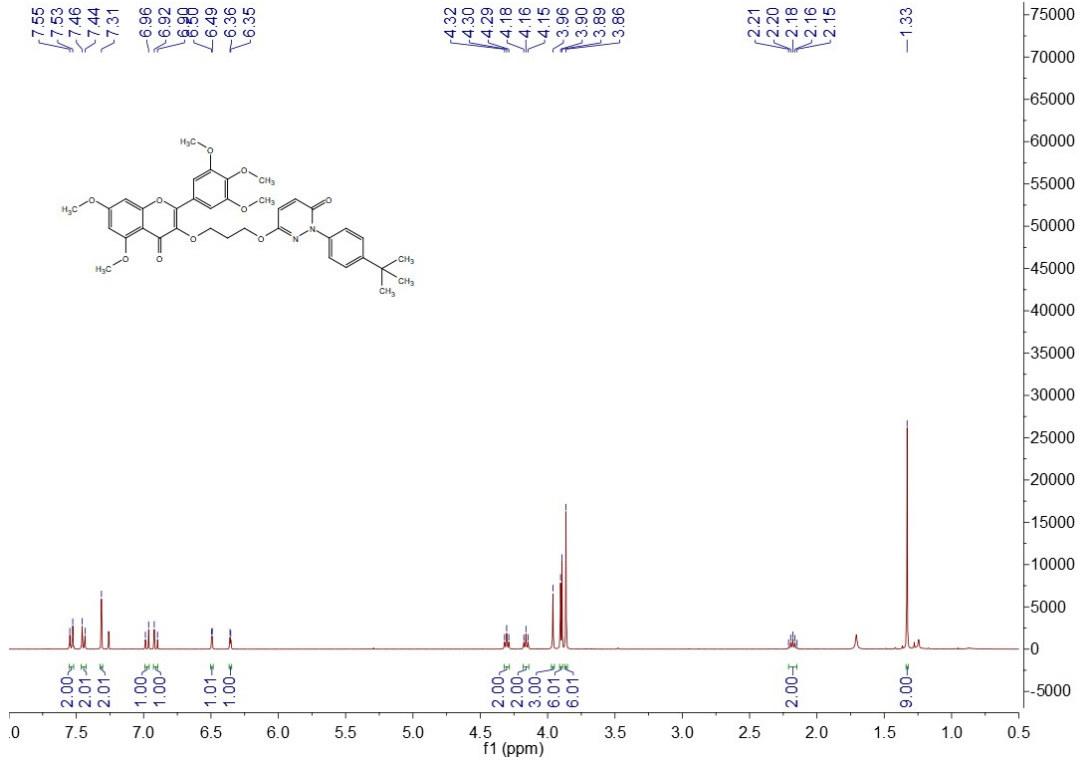

167

168

169

Fig. 23  $^1\text{H}$  NMR spectrum of A8

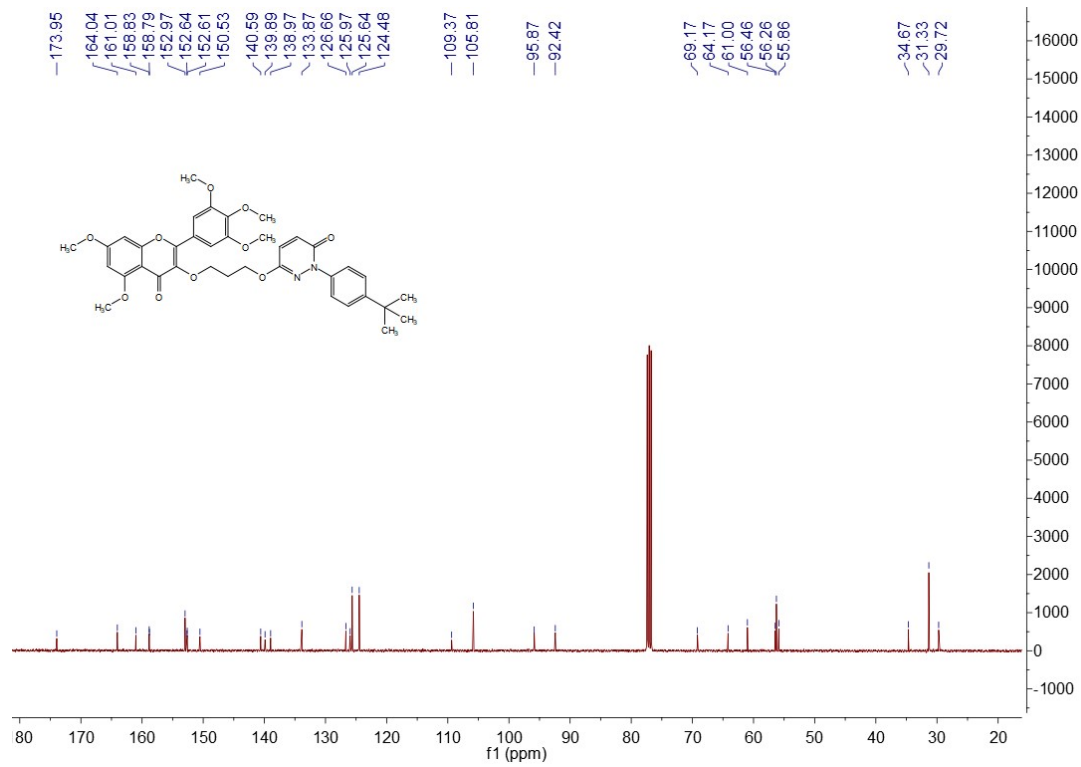

170

171

**Fig. 24**  $^{13}\text{C}$  NMR spectrum of A8

68 #81 RT: 0.79 AV: 1 NL: 2.07E+008  
T: FTMS + p ESI Full ms [100.0000-1300.0000]

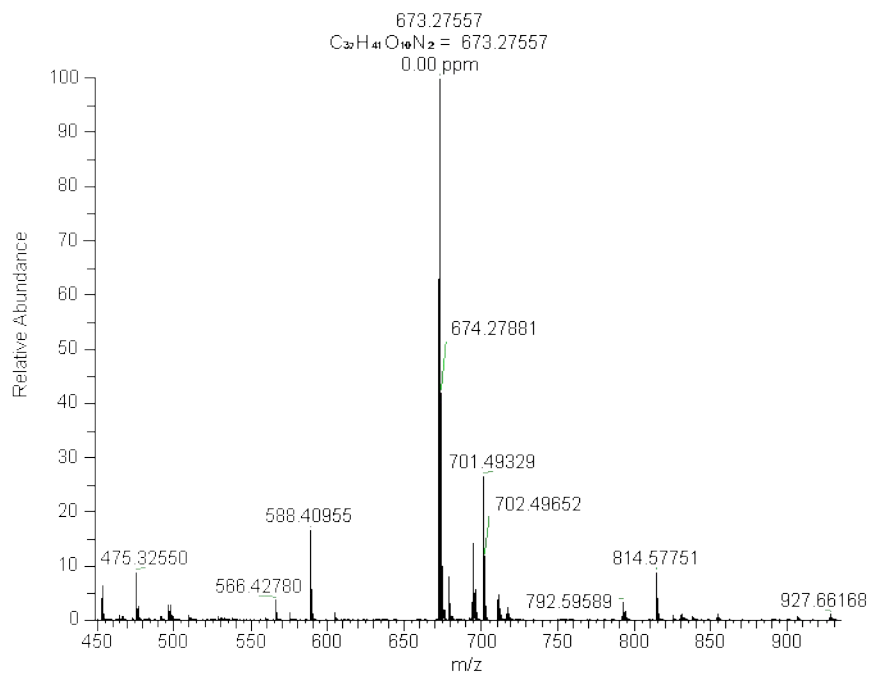

172

173

**Fig. 25** HRMS spectrum of A8

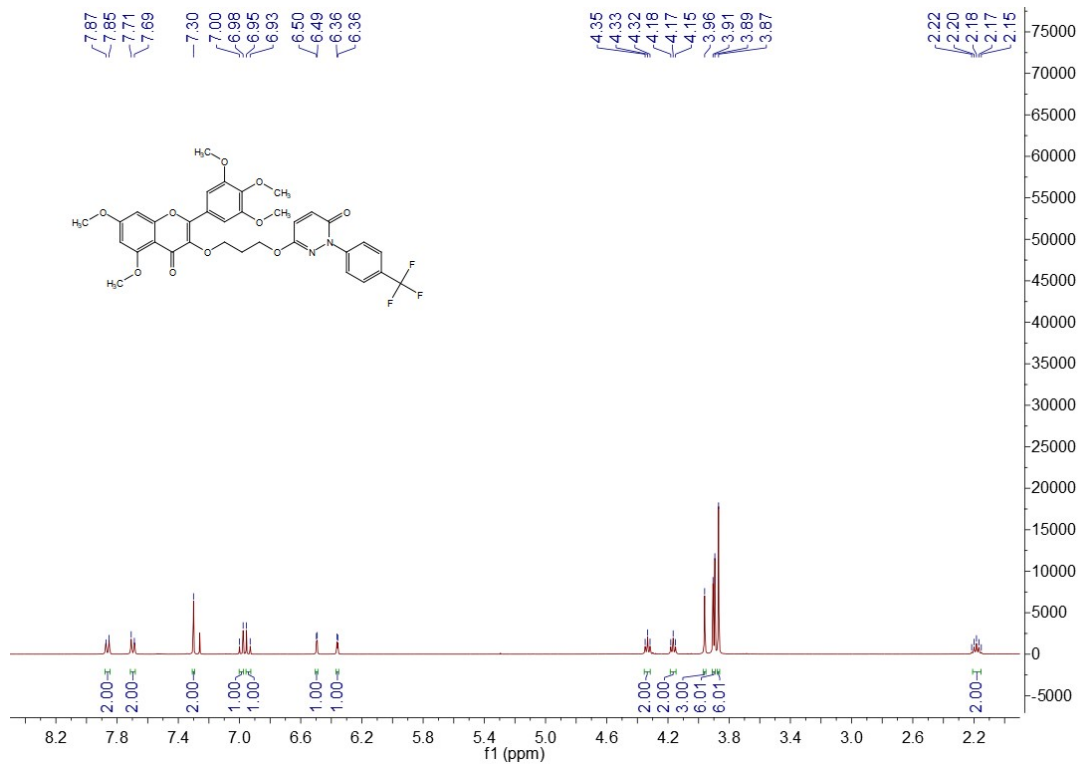

174

175

Fig. 26 <sup>1</sup>H NMR spectrum of A9

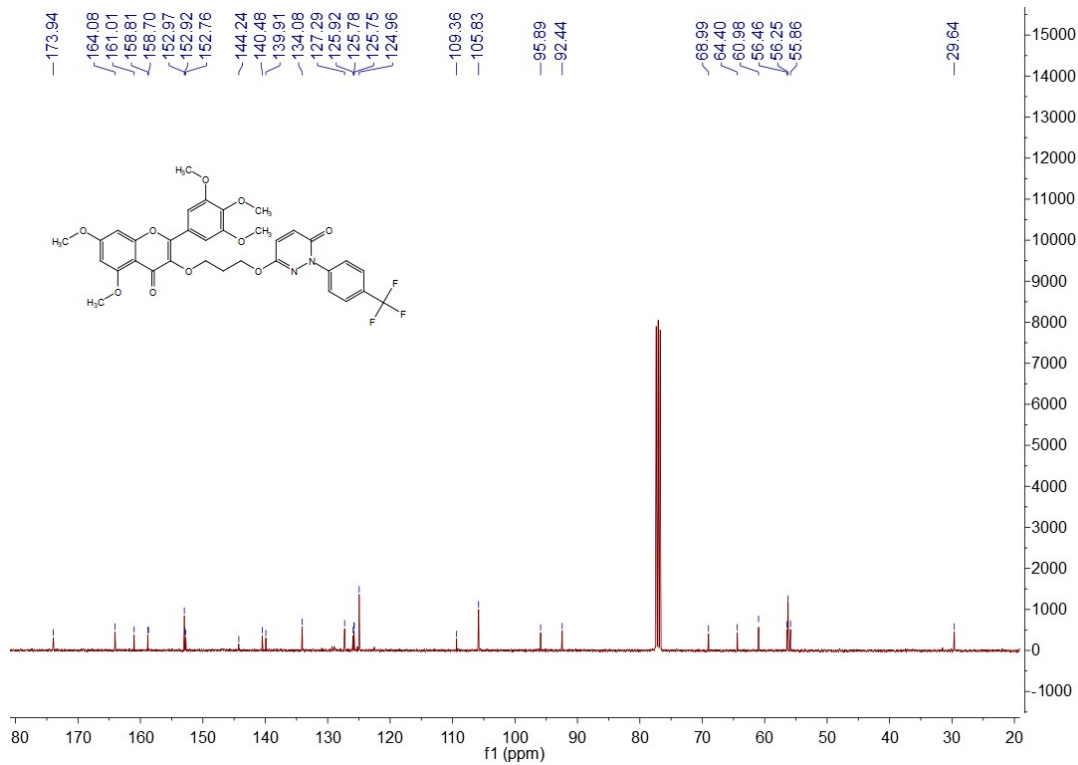

176

177

Fig. 27 <sup>13</sup>C NMR spectrum of A9

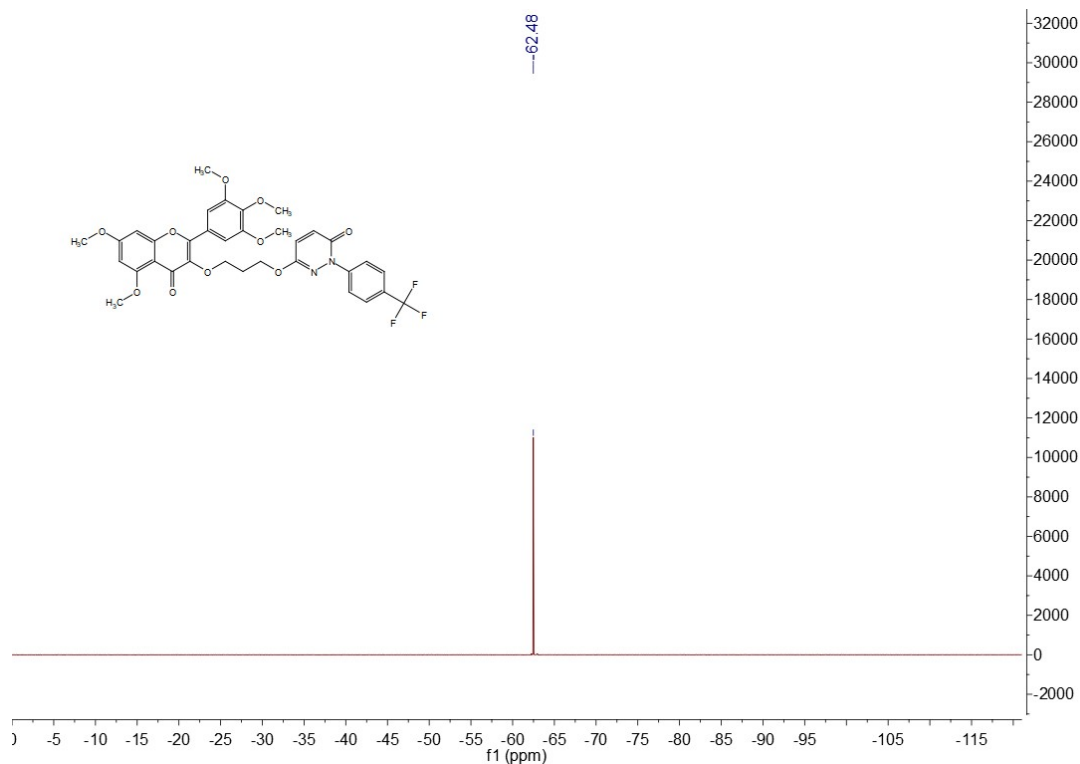

178

179

**Fig. 28**  $^{19}\text{F}$  NMR spectrum of A9

69 #55 RT: 0.54 A/: 1 NL: 1.52E+008  
T: FTMS + p ESI Full ms [100.0000-1300.0000]

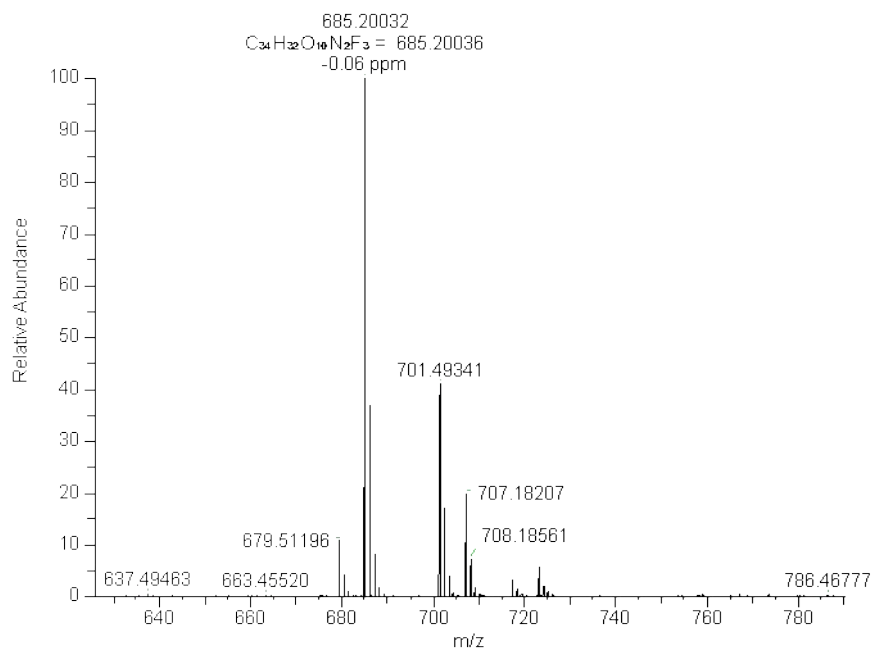

180

181

**Fig. 29** HRMS spectrum of A9

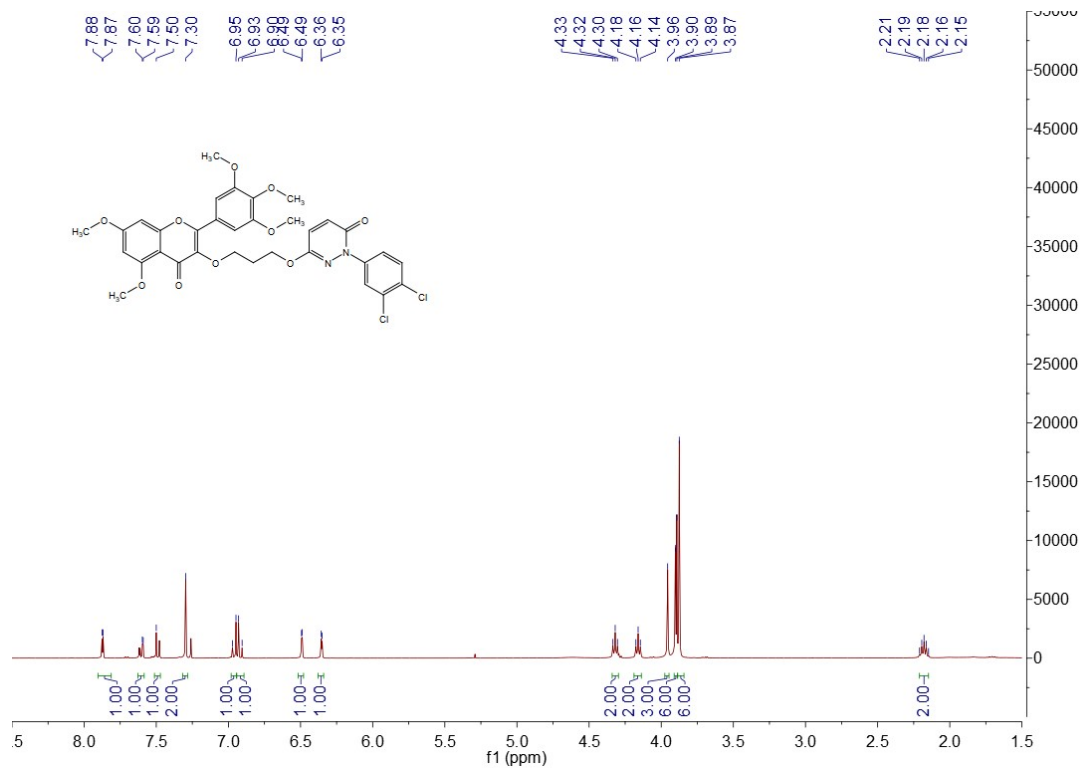

182

183

Fig. 30 <sup>1</sup>H NMR spectrum of A10

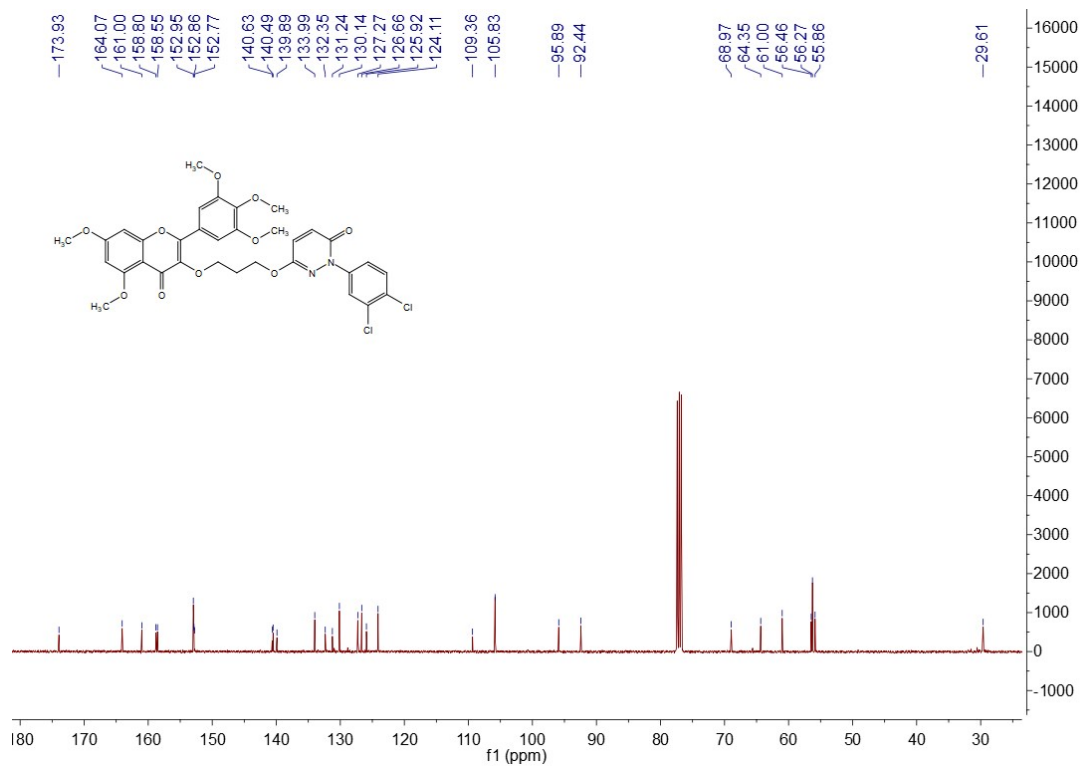

184

185

Fig. 31 <sup>13</sup>C NMR spectrum of A10

70 #69 RT: 0.68 AV: 1 NL: 1.35E+007  
T: FTMS + p ESI Full ms [100.0000-1300.0000]

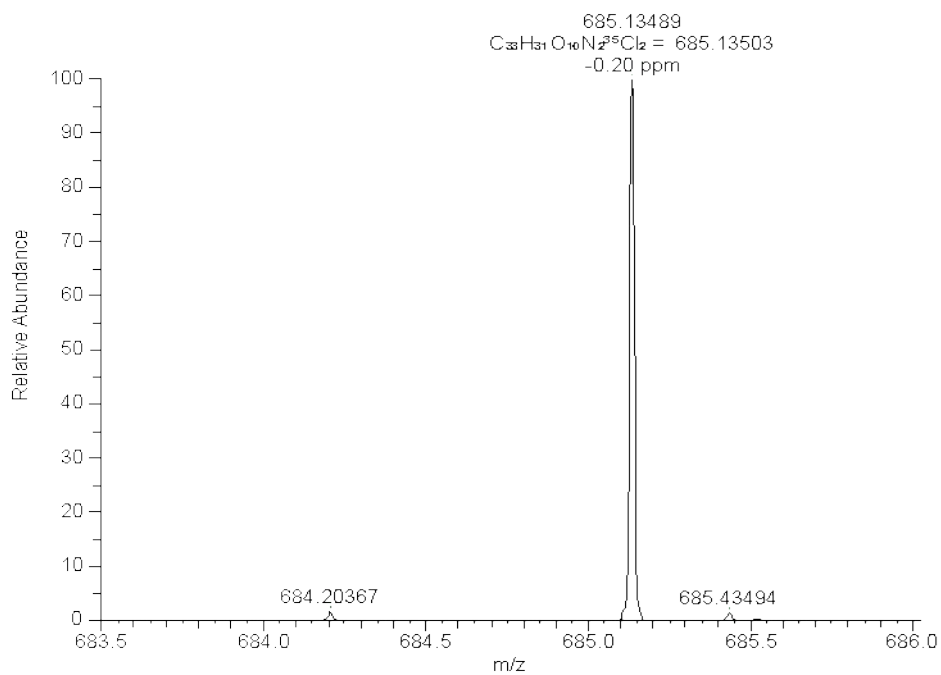

186

187

Fig. 32 HRMS spectrum of A10

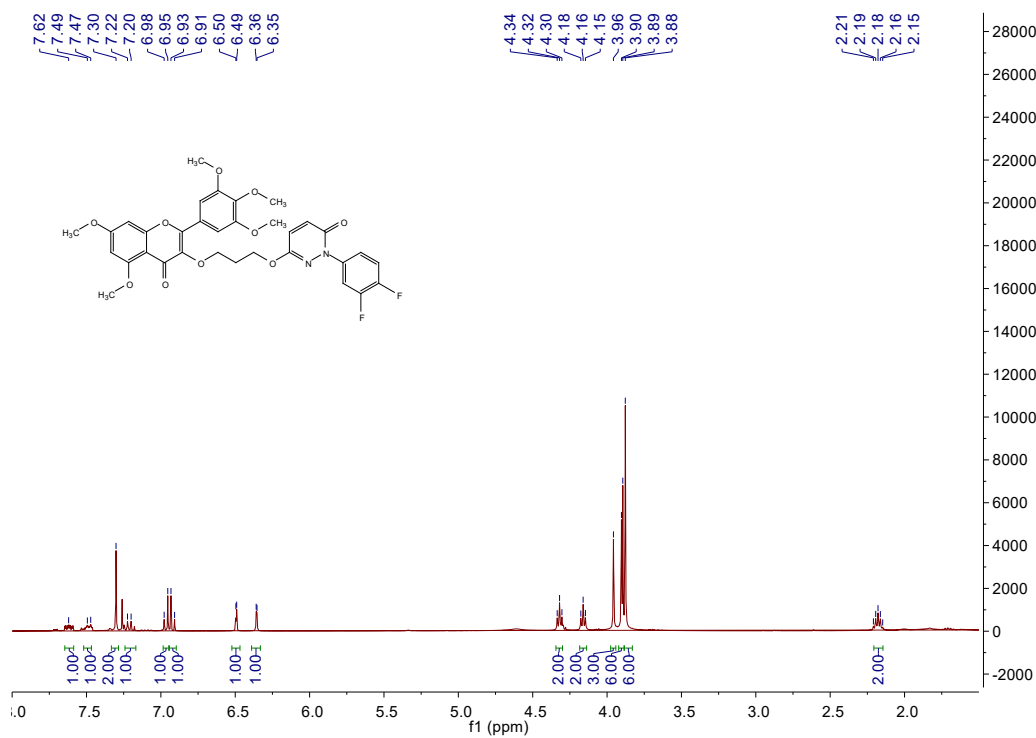

188

189

Fig. 33  $^1H$  NMR spectrum of A11

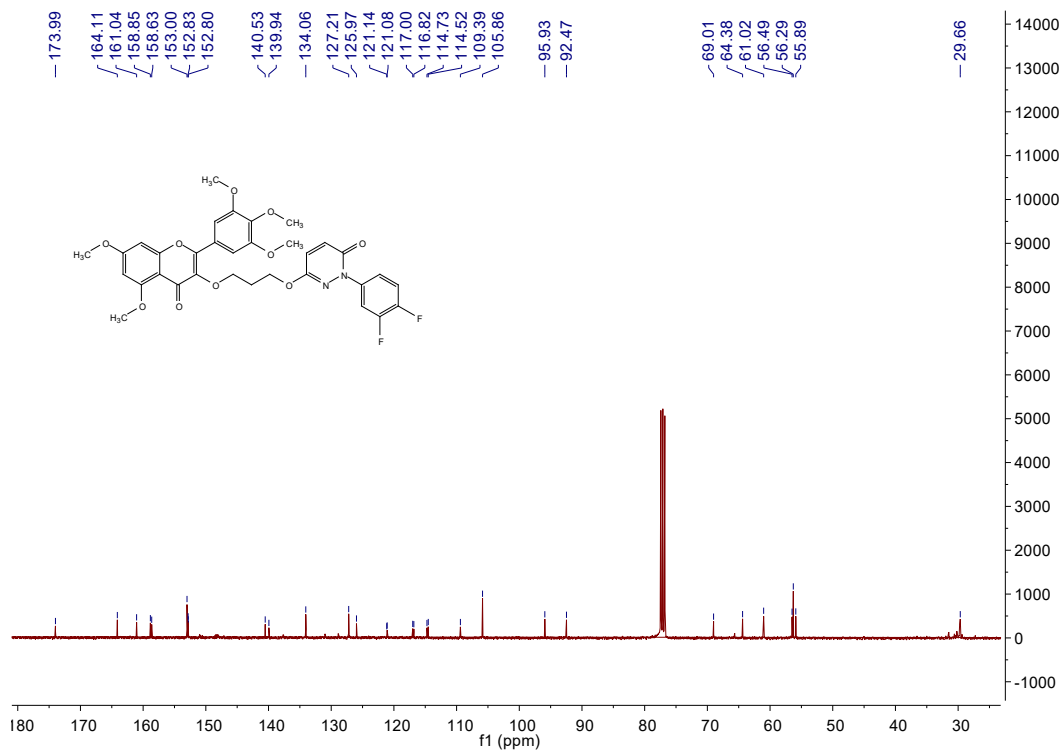

190

191

**Fig. 34** <sup>13</sup>C NMR spectrum of A11

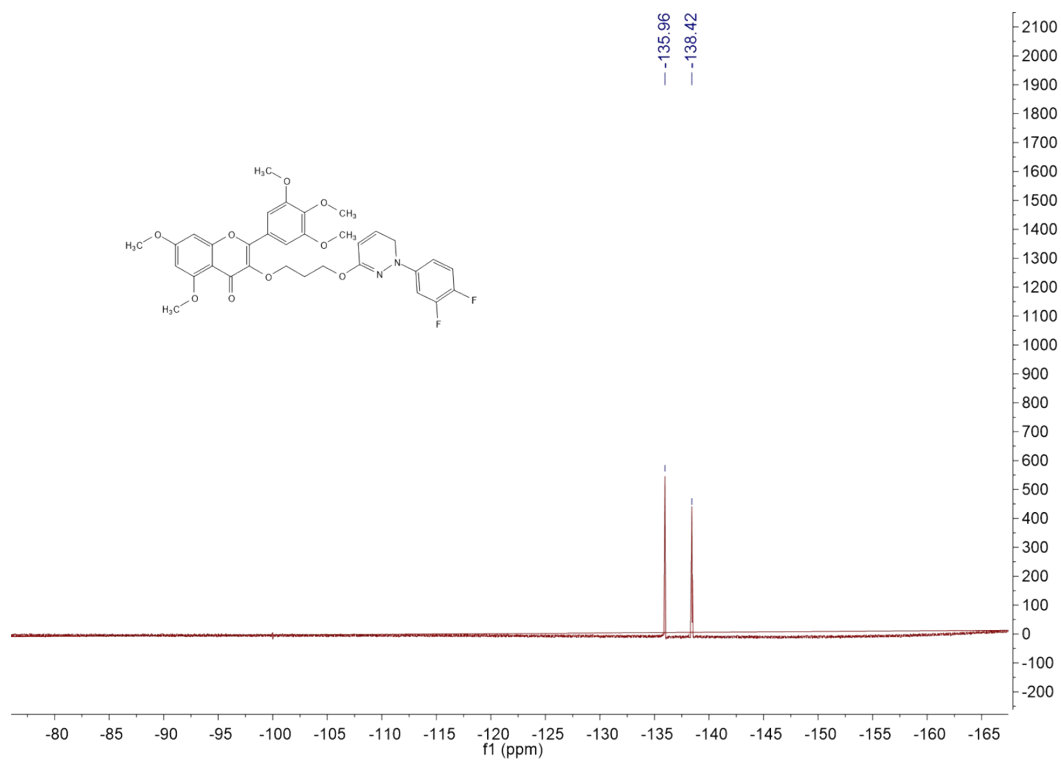

192

193

**Fig. 35** <sup>19</sup>F NMR spectrum of A11

71 #49 RT: 0.49 AV: 1 NL: 4.34E+007  
 T: FTMS + p ESI Full ms [100.0000-1300.0000]

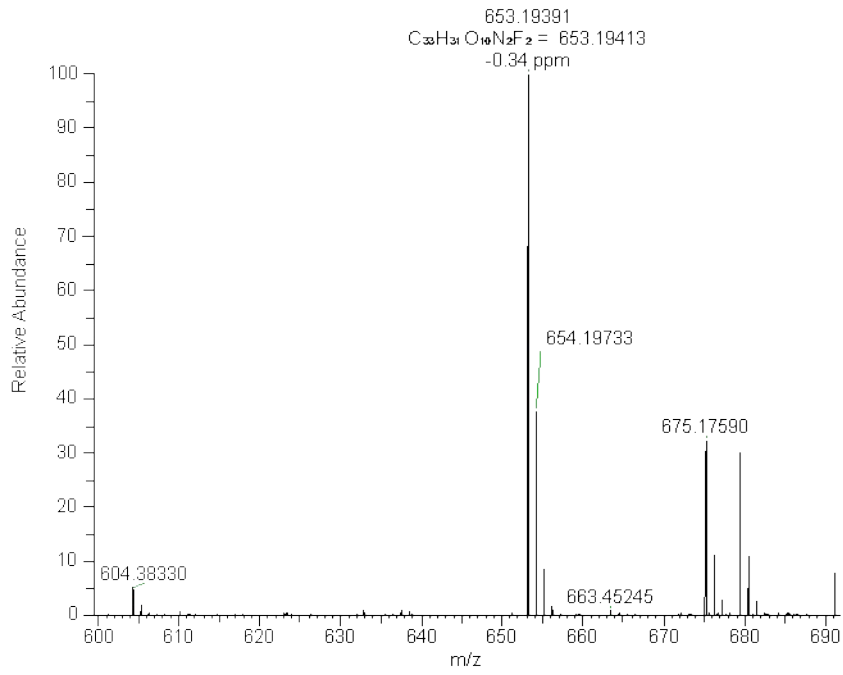

194

195

Fig. 36 HRMS spectrum of A11

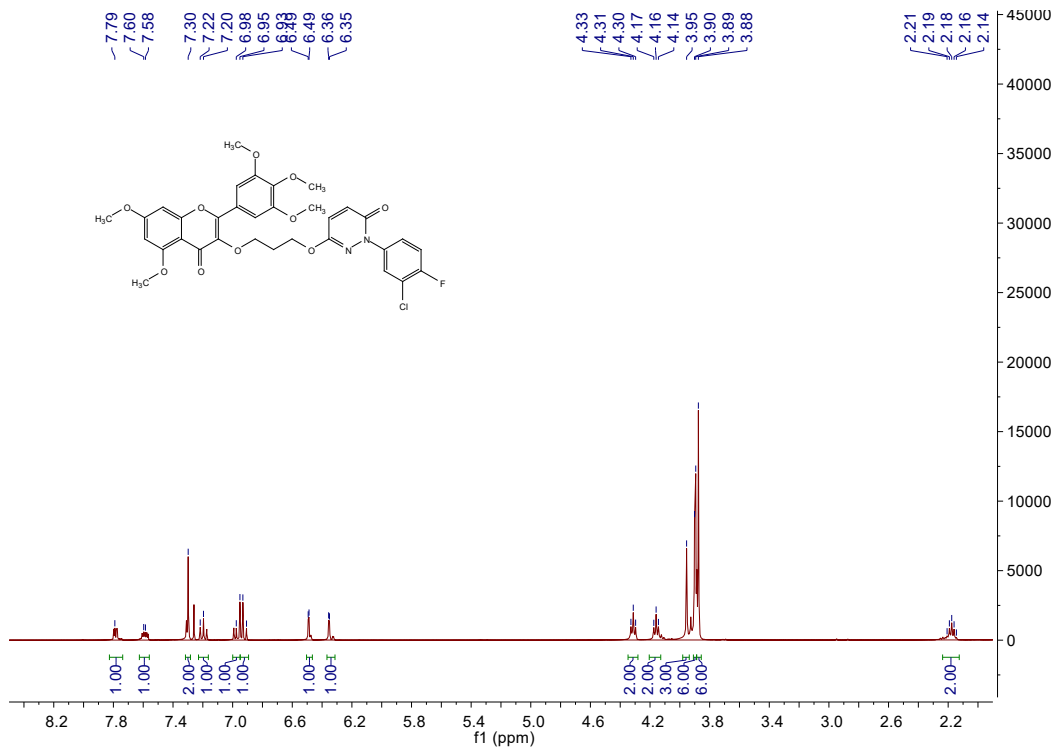

196

197

Fig. 37  $^1H$  NMR spectrum of A12



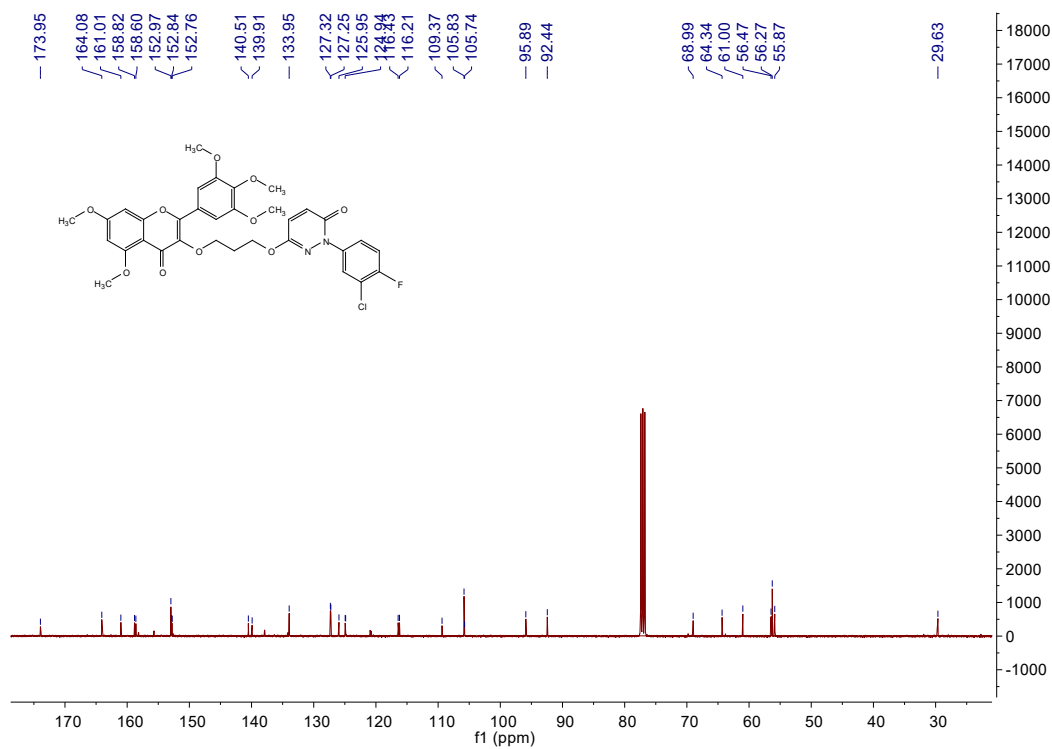

198

199

**Fig. 38**  $^{13}\text{C}$  NMR spectrum of A12

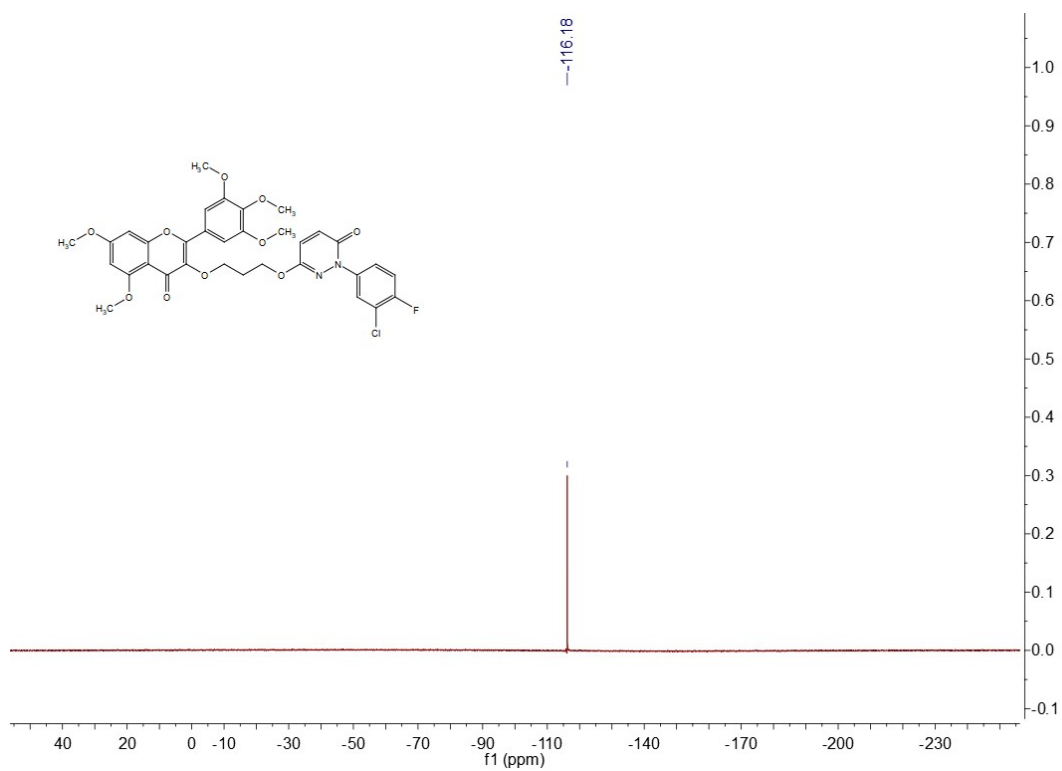

200

201

**Fig. 39**  $^{19}\text{F}$  NMR spectrum of A12

72 #55 RT: 0.54 AV: 1 NL: 3.07E+007  
T: FTMS + p ESI Full ms [100.0000-1300.0000]

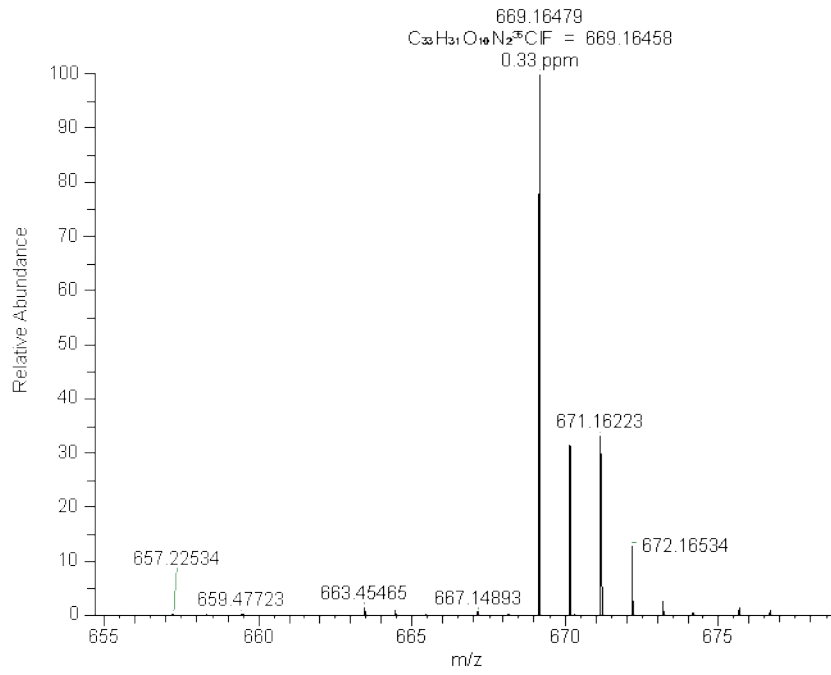

202

203

Fig. 40 HRMS spectrum of A12

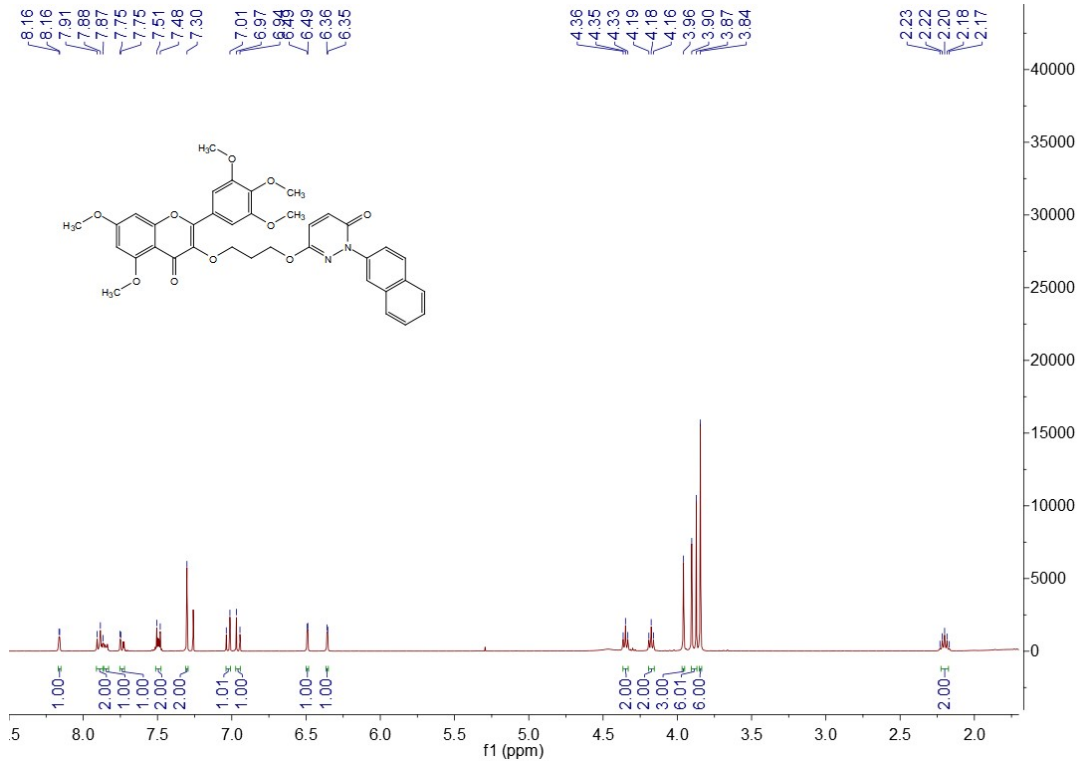

204

205

Fig. 41  $^1H$  NMR spectrum of A13

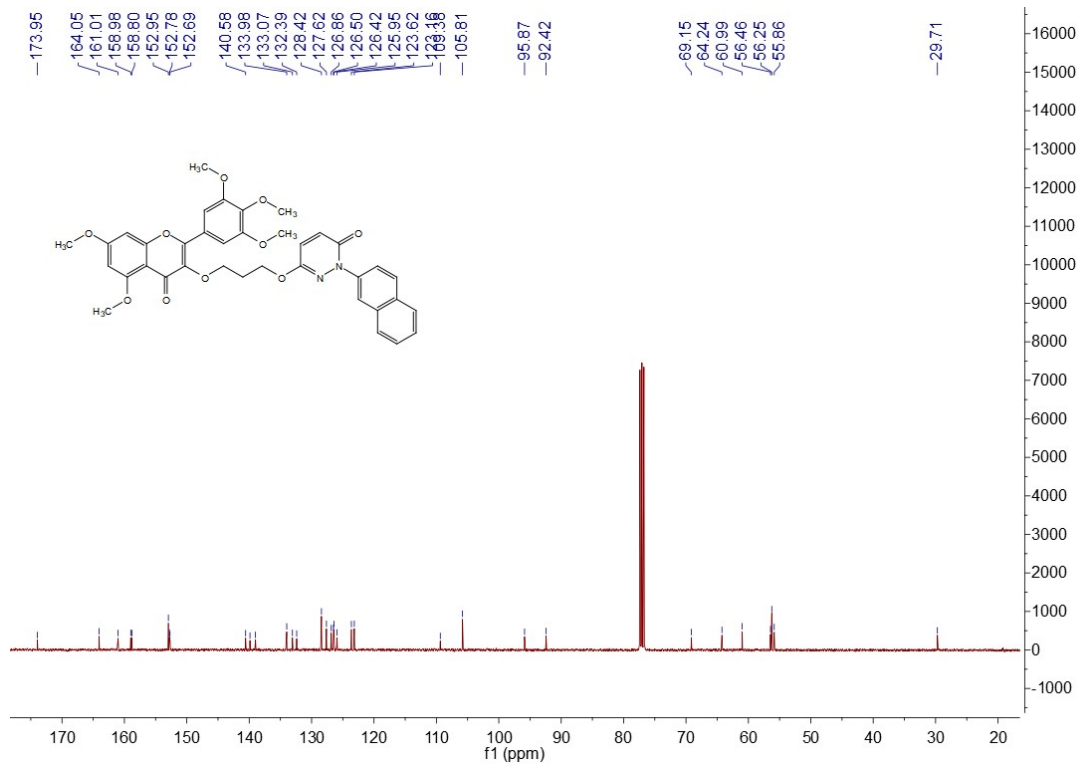

206

207

**Fig. 42** <sup>13</sup>C NMR spectrum of A13

73 #57 RT: 0.56 AV: 1 NL: 8.57E+007  
T: FTMS + p ESI Full ms [100.0000-1300.0000]

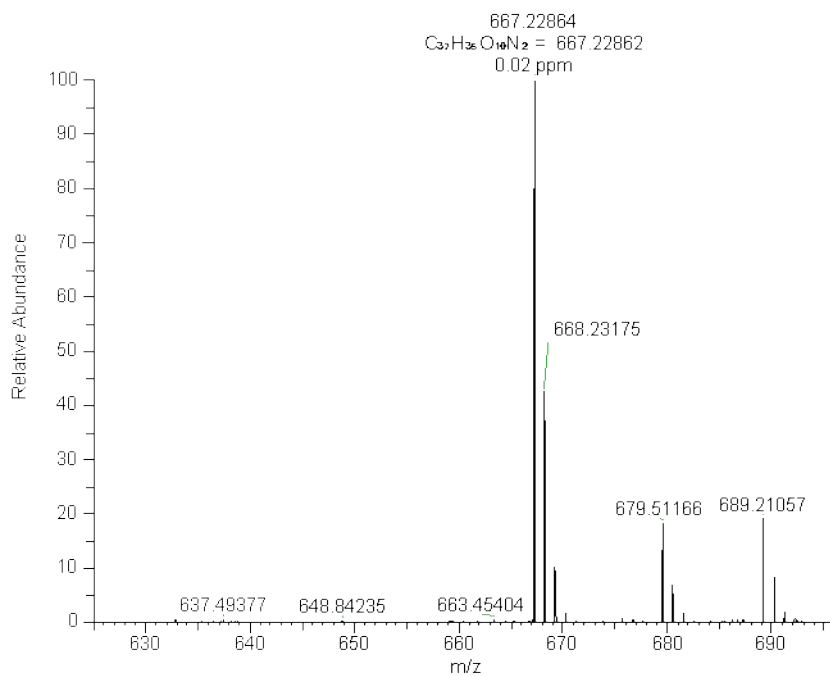

208

209

**Fig. 43** HRMS spectrum of A13

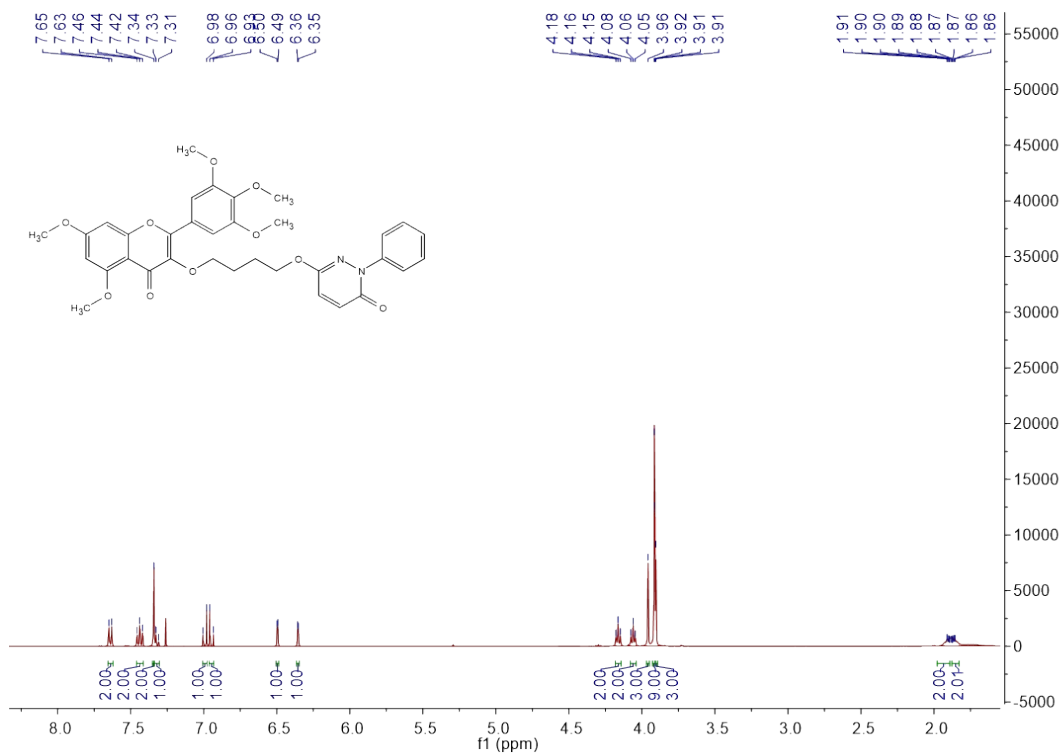

210

211

Fig. 44 <sup>1</sup>H NMR spectrum of A14

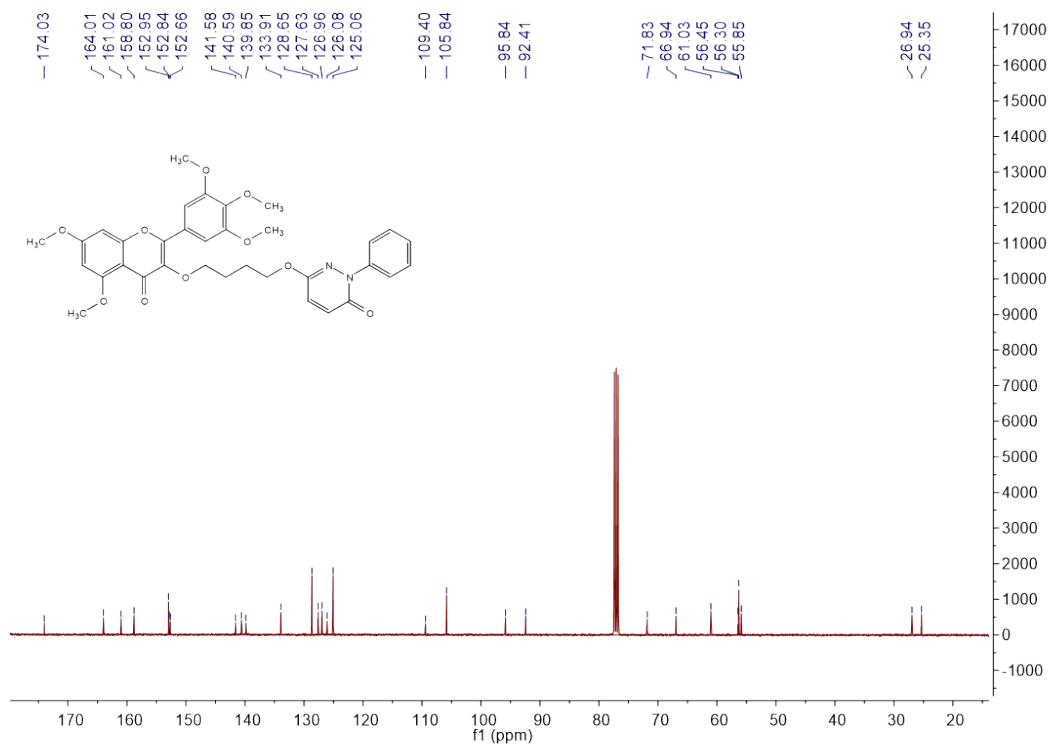

212

213

Fig. 45 <sup>13</sup>C NMR spectrum of A14

11 #43 RT: 0.43 AV: 1 NL: 1.71E+008  
T: FTMS + p ESI Full ms [150.0000-2200.0000]

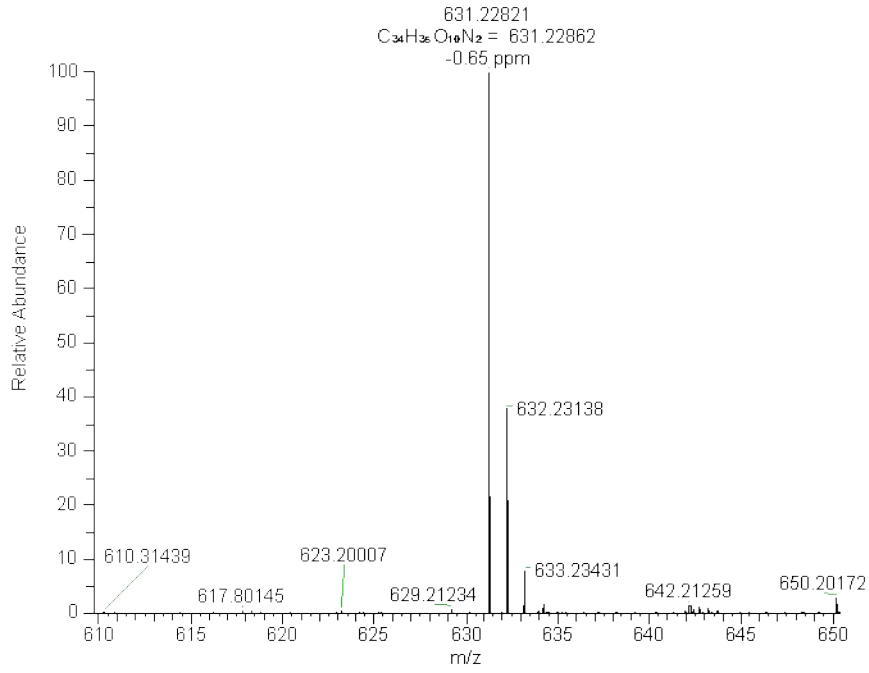

214

215

Fig. 46 HRMS spectrum of A14

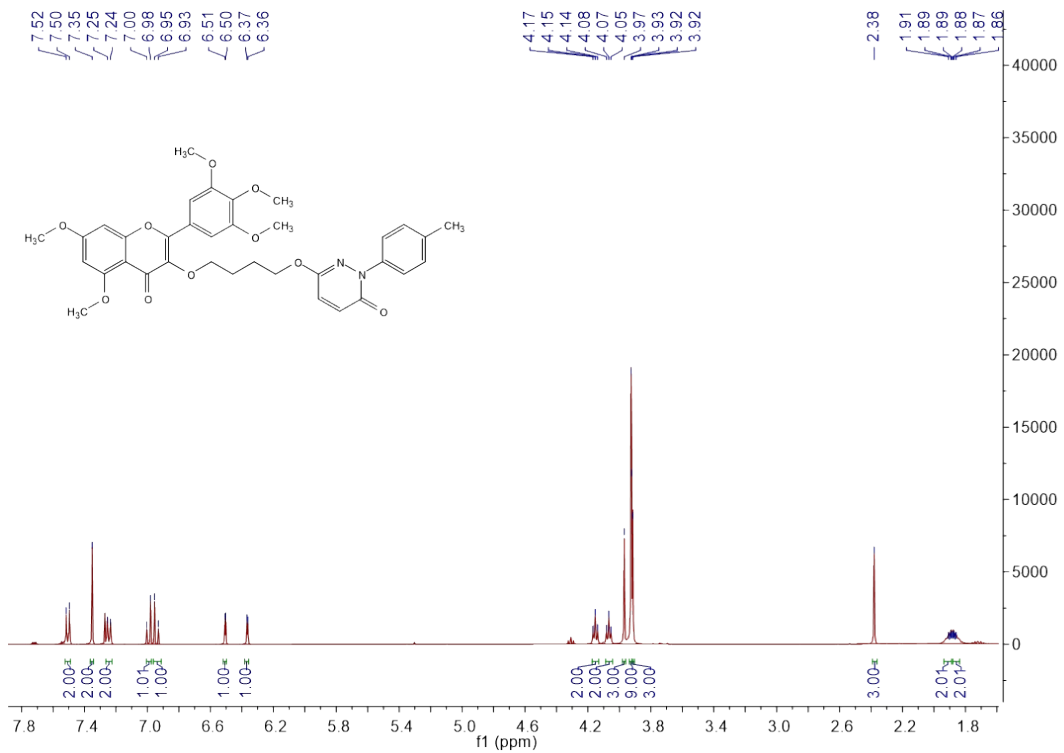

216

217

Fig. 47  $^1H$  NMR spectrum of A15

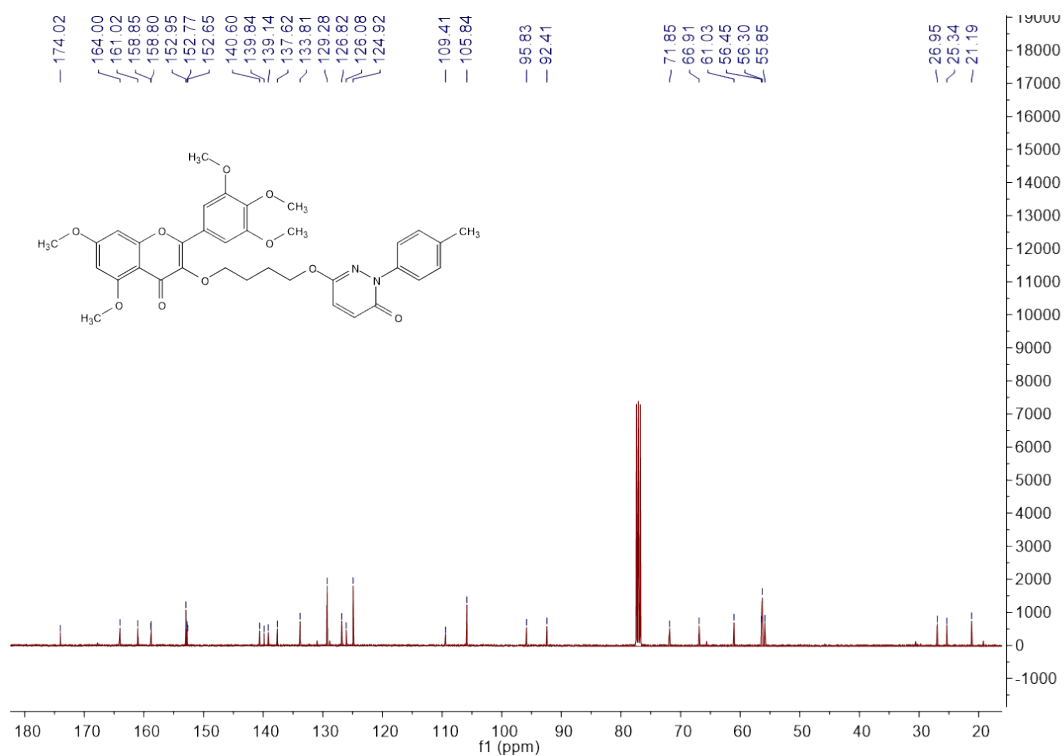

218

219

**Fig. 48**  $^{13}\text{C}$  NMR spectrum of A15

12 #47 RT: 0.47 AV: 1 NL: 1.50E+008  
T: FTMS + p ESI Full ms [150.0000-2200.0000]

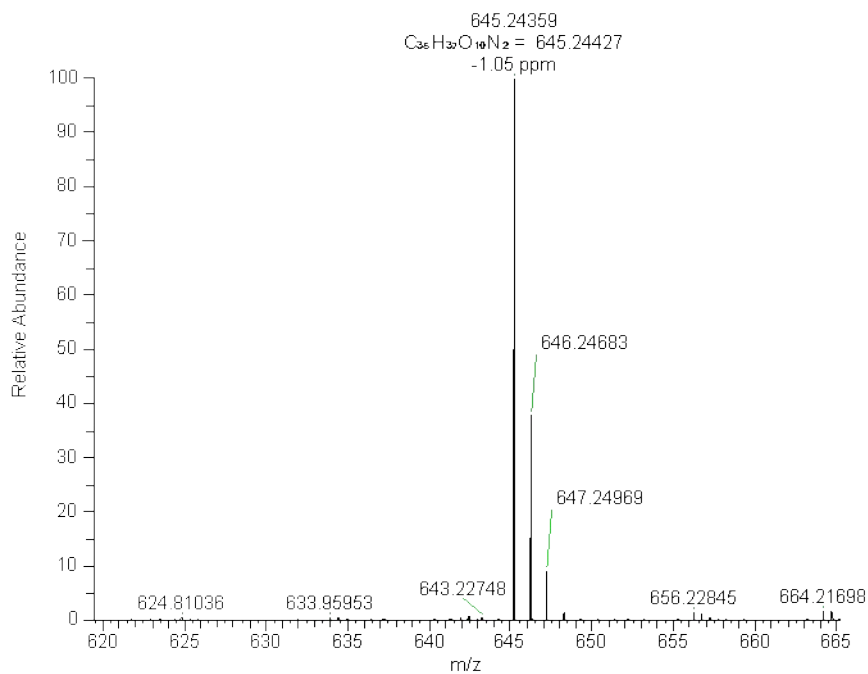

220

221

**Fig. 49** HRMS spectrum of A15

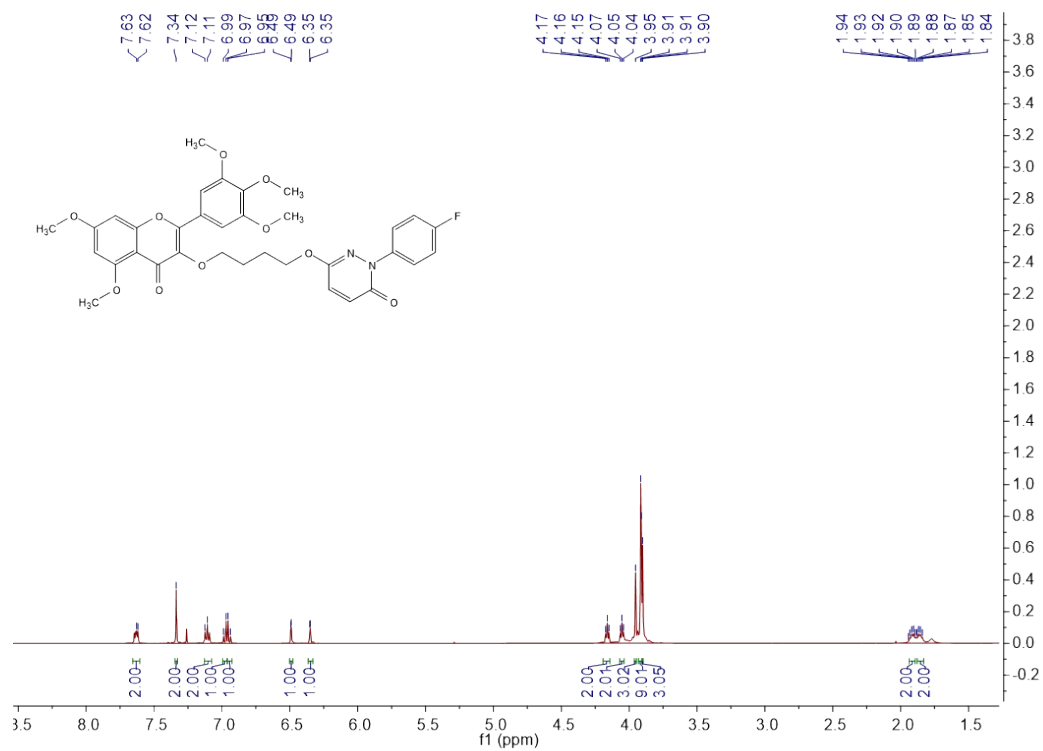

222

223

Fig. 50 <sup>1</sup>H NMR spectrum of A16

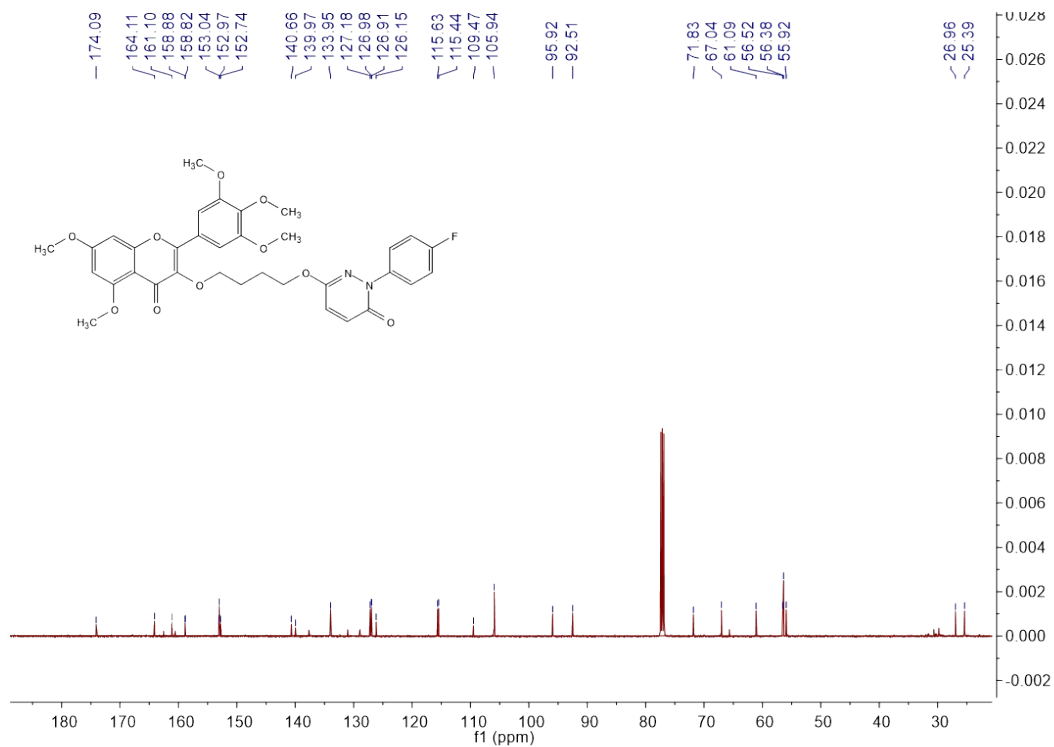

224

225

Fig. 51 <sup>13</sup>C NMR spectrum of A16

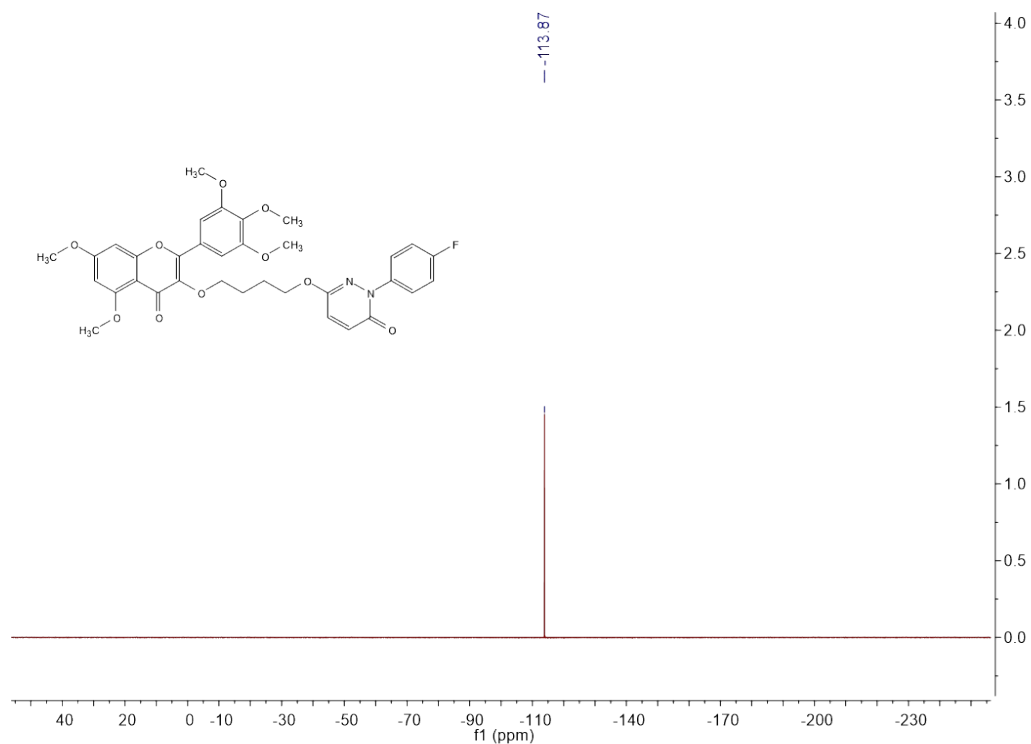

226

227

**Fig. 52**  $^{19}\text{F}$  NMR spectrum of A16

13 #55 RT: 0.56 AV: 1 NL: 1.24E+007  
T: FTMS + p ESI Full ms [150.0000-2200.0000]

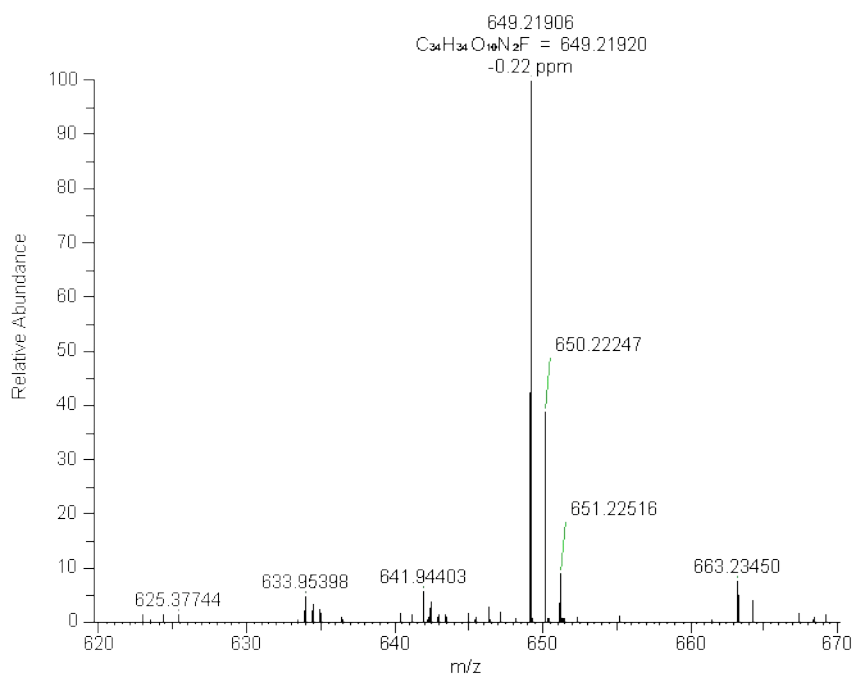

228

229

**Fig. 53** HRMS spectrum of A16



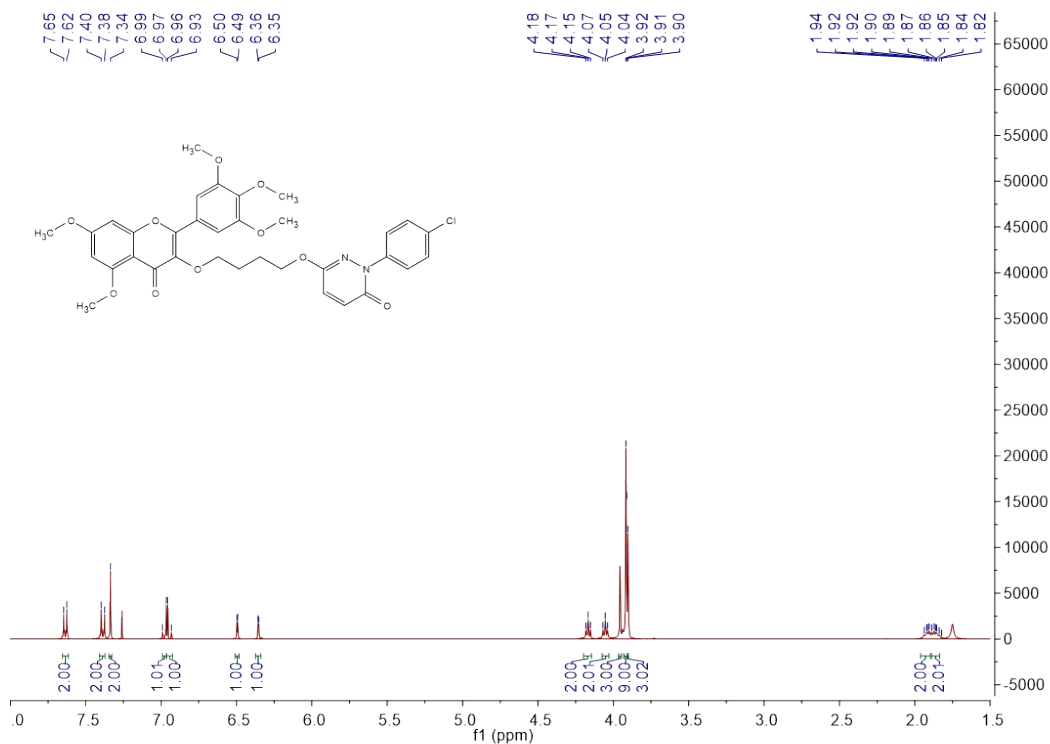

230

231

Fig. 54 <sup>1</sup>H NMR spectrum of A17

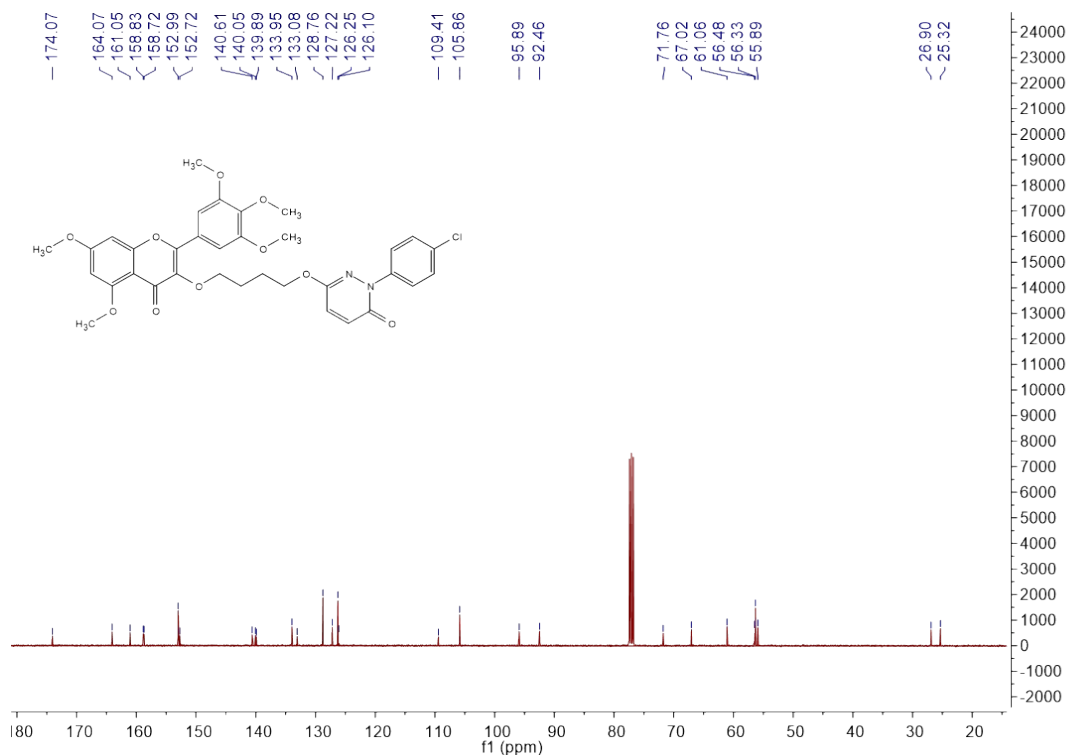

232

233

Fig. 55 <sup>13</sup>C NMR spectrum of A17

15 #49 RT: 0.49 AV: 1 NL: 3.25E+007  
T: FTMS + p ESI Full ms [150.0000-2200.0000]

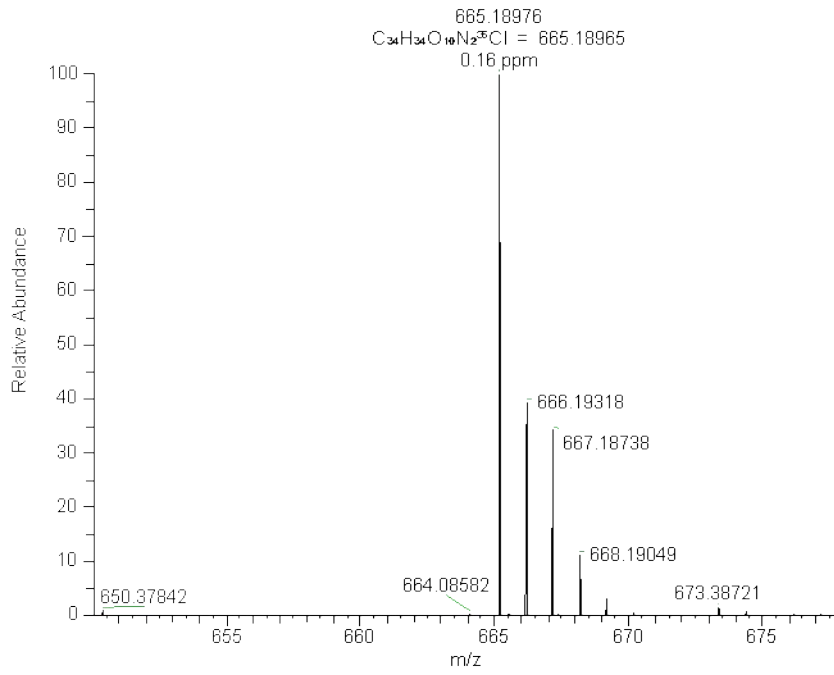

234

235

Fig. 56 HRMS spectrum of A17

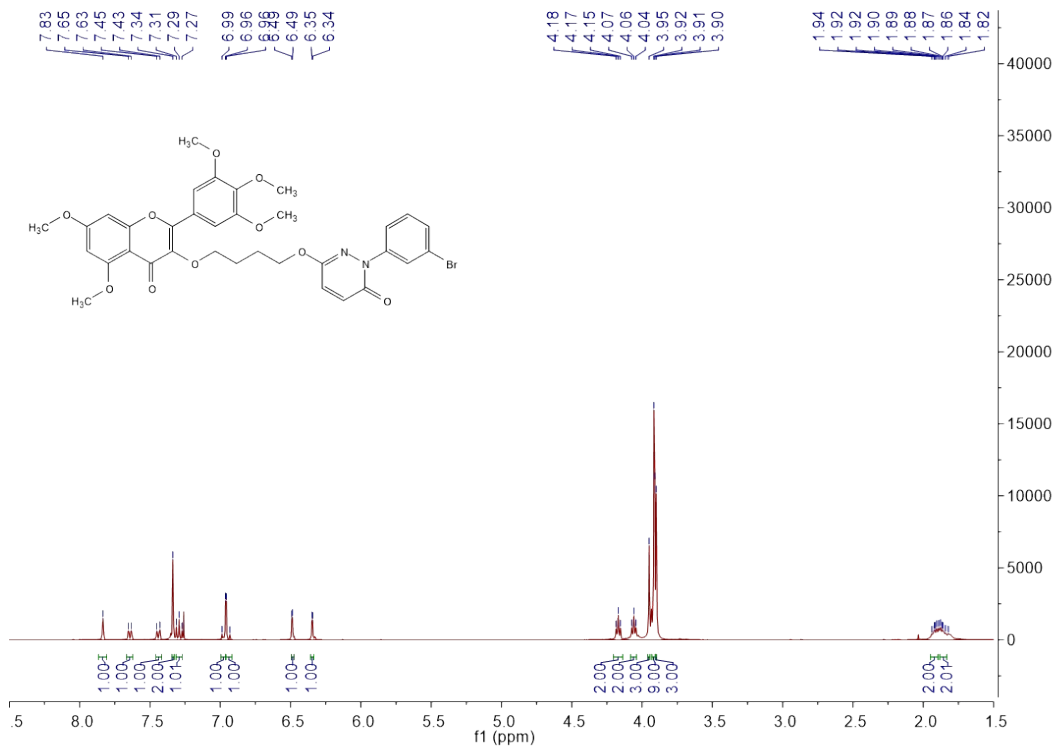

236

237

Fig. 57  $^1H$  NMR spectrum of A18

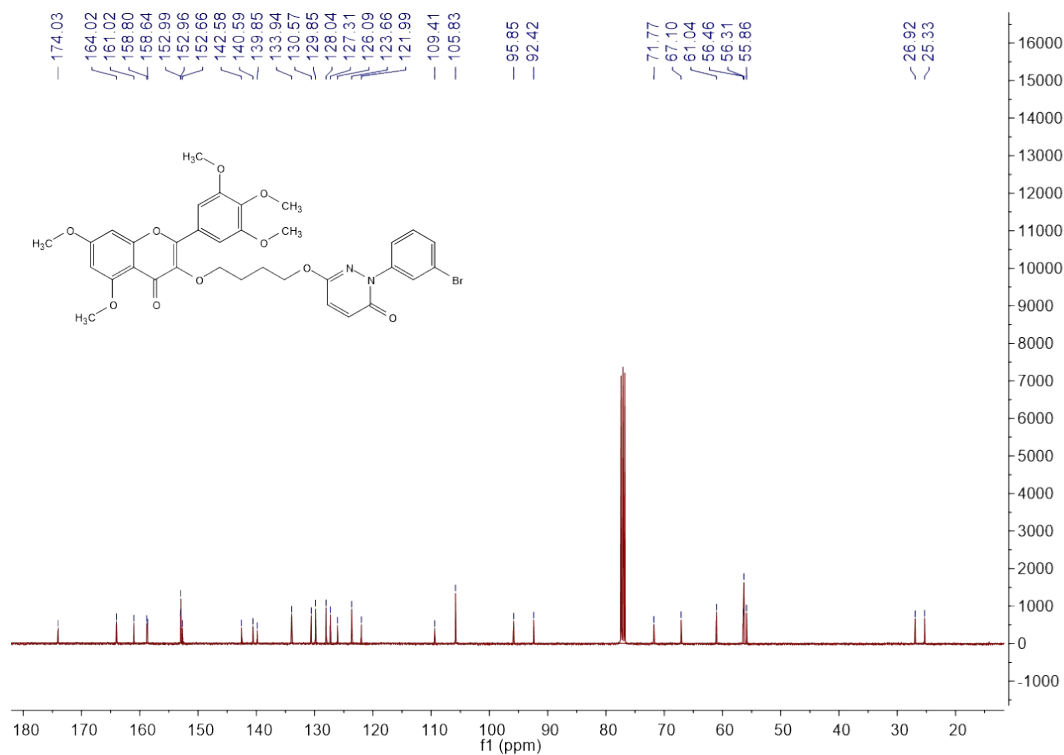

238

239

**Fig. 58**  $^{13}\text{C}$  NMR spectrum of A18

14 #51 RT: 0.51 AV: 1 NL: 1.18E+007  
T: FTMS + p ESI Full ms [150.0000-2200.0000]

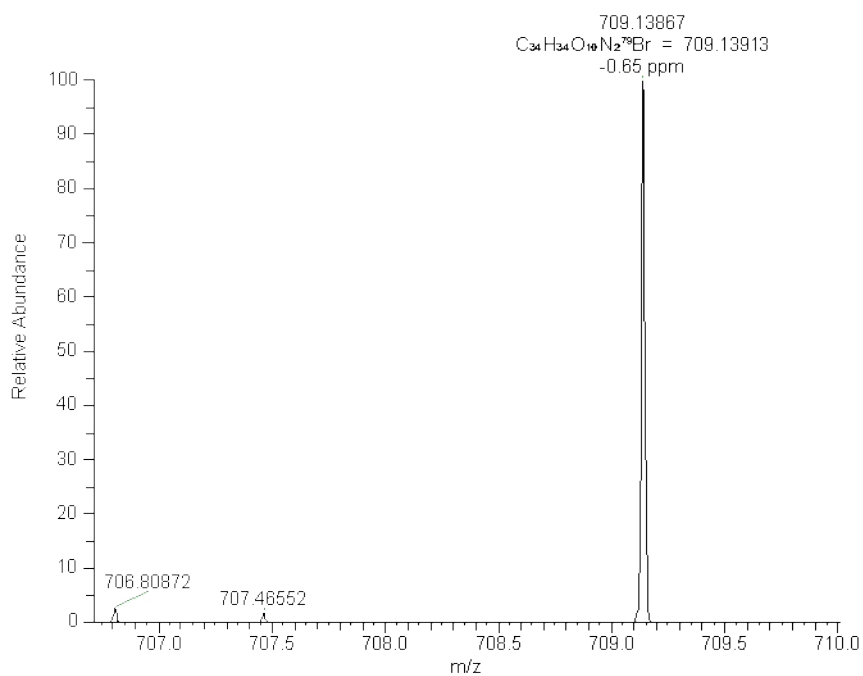

240

241

**Fig. 59** HRMS spectrum of A18

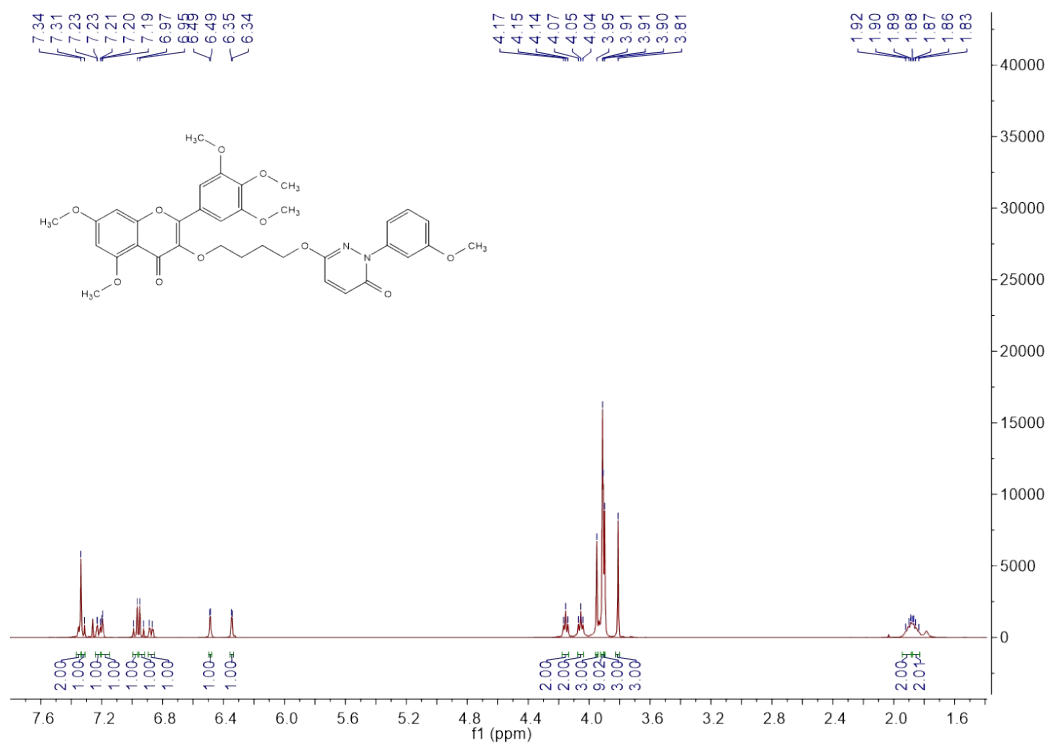

242

243

**Fig. 60** <sup>1</sup>H NMR spectrum of A19

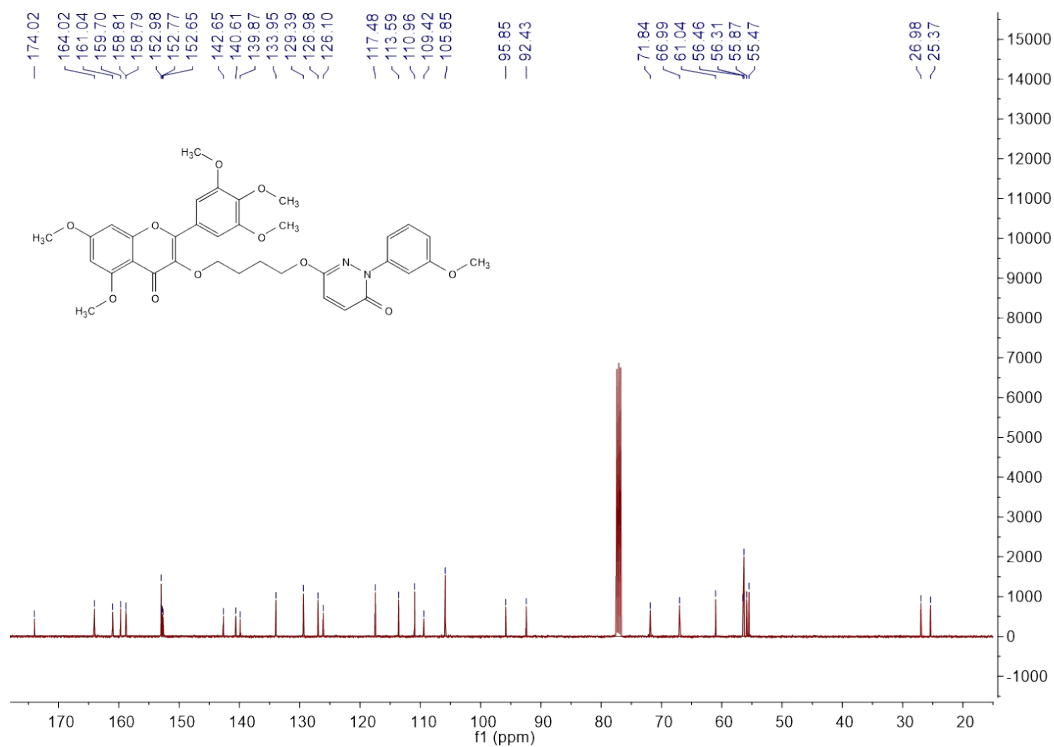

244

245

**Fig. 61** <sup>13</sup>C NMR spectrum of A19

16 #49 RT: 0.49 AV: 1 NL: 6.45E+007  
T: FTMS + p ESI Full ms [150.0000-2200.0000]

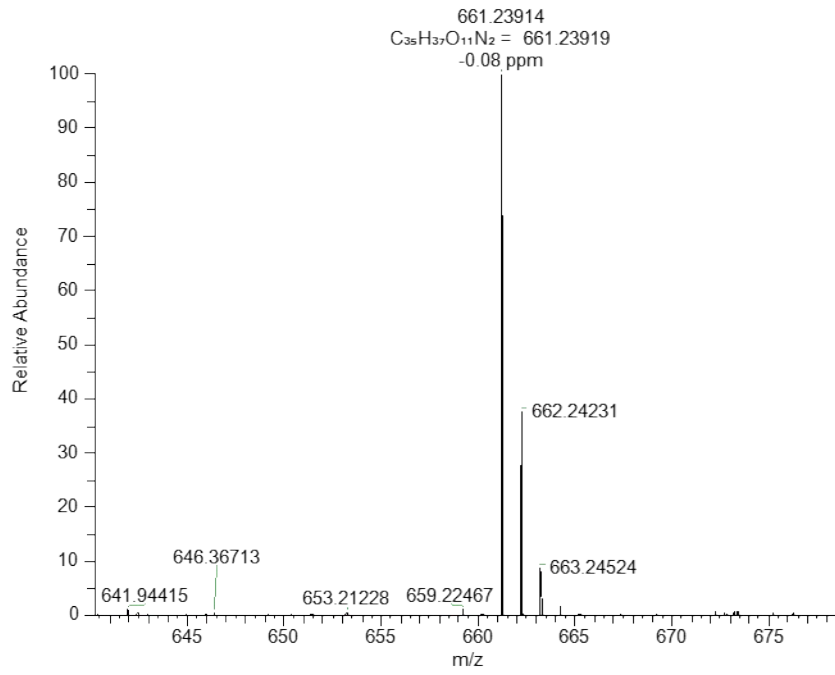

246

247

Fig. 62 HRMS spectrum of A19

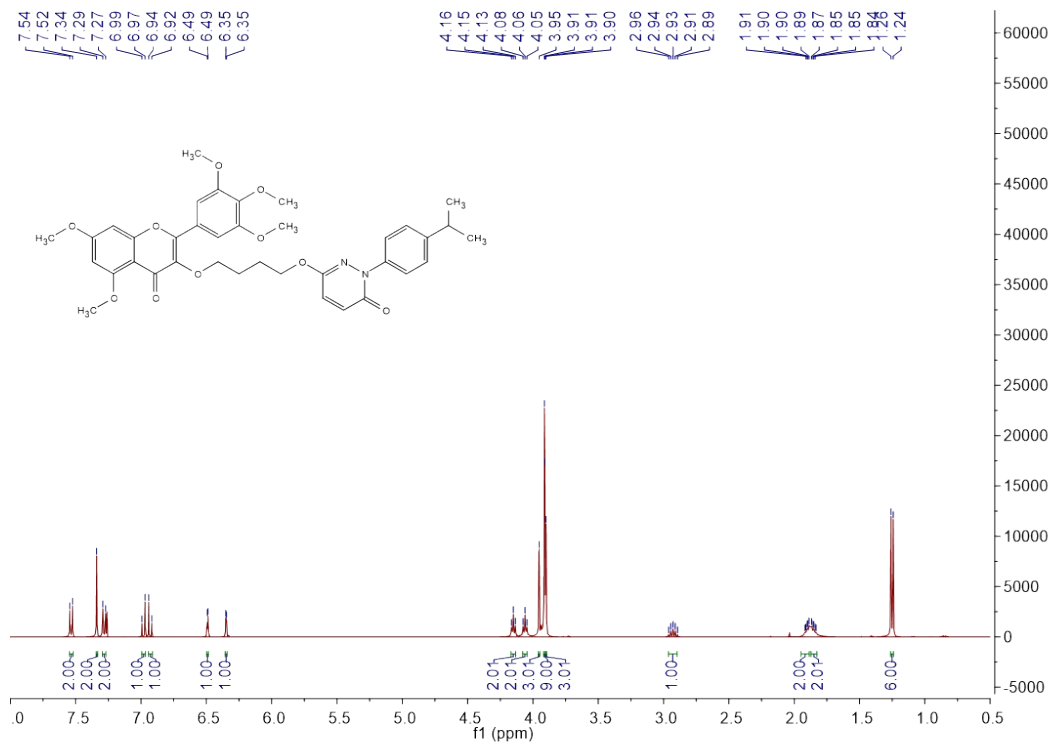

248

249

Fig. 63 <sup>1</sup>H NMR spectrum of A20

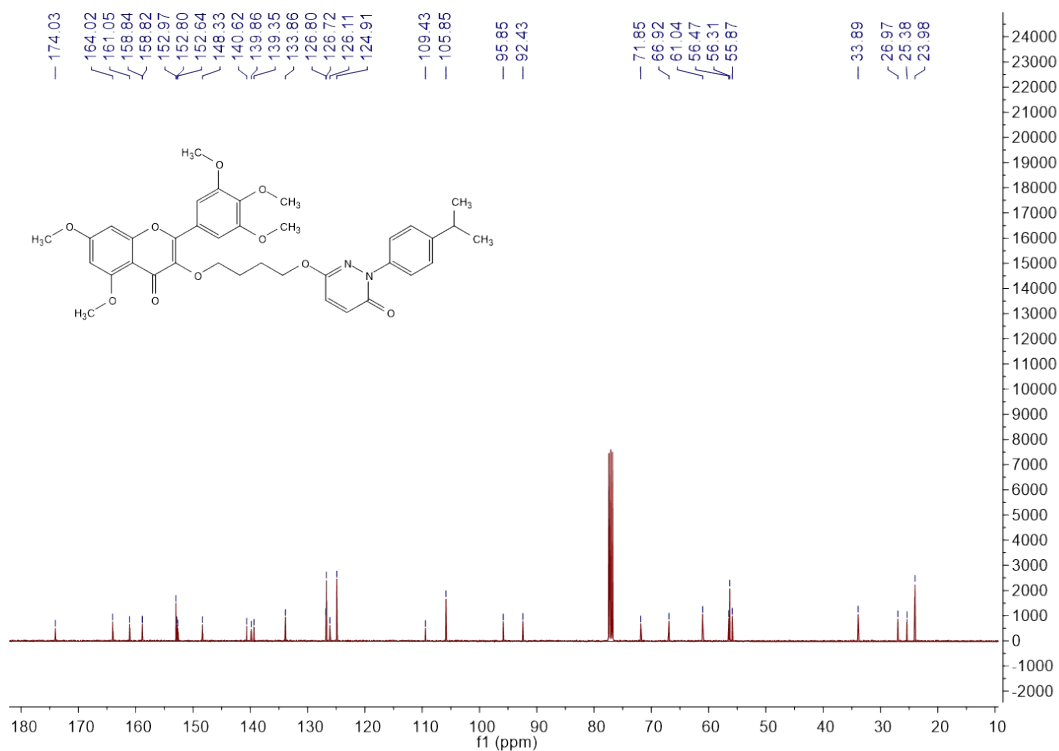

250

251

**Fig. 64** <sup>13</sup>C NMR spectrum of A20

75 #75 RT: 0.74 AV: 1 NL: 2.22E+008  
T: FTMS + p ESI Full ms [100.0000-1300.0000]

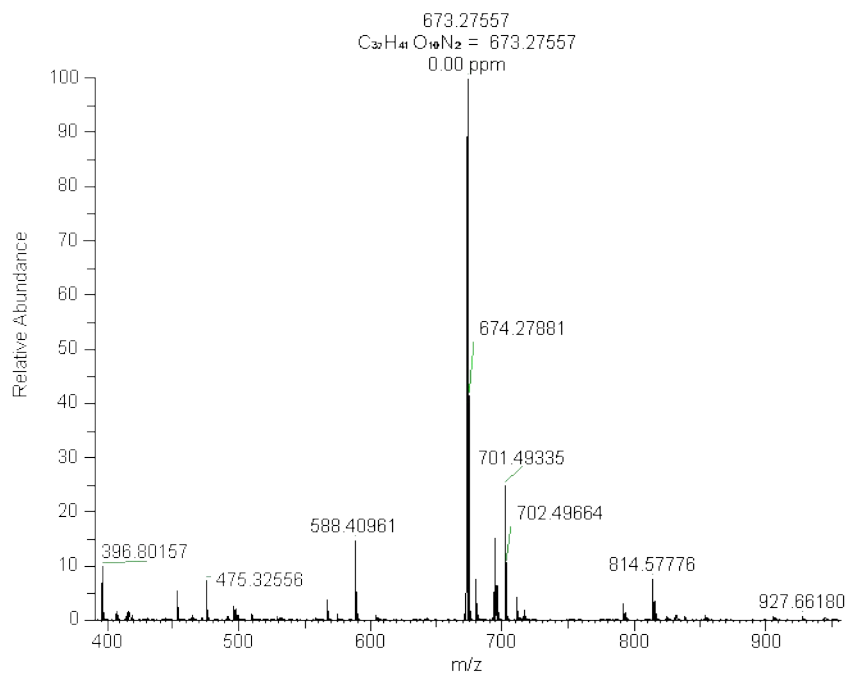

252

253

**Fig. 65** HRMS spectrum of A20

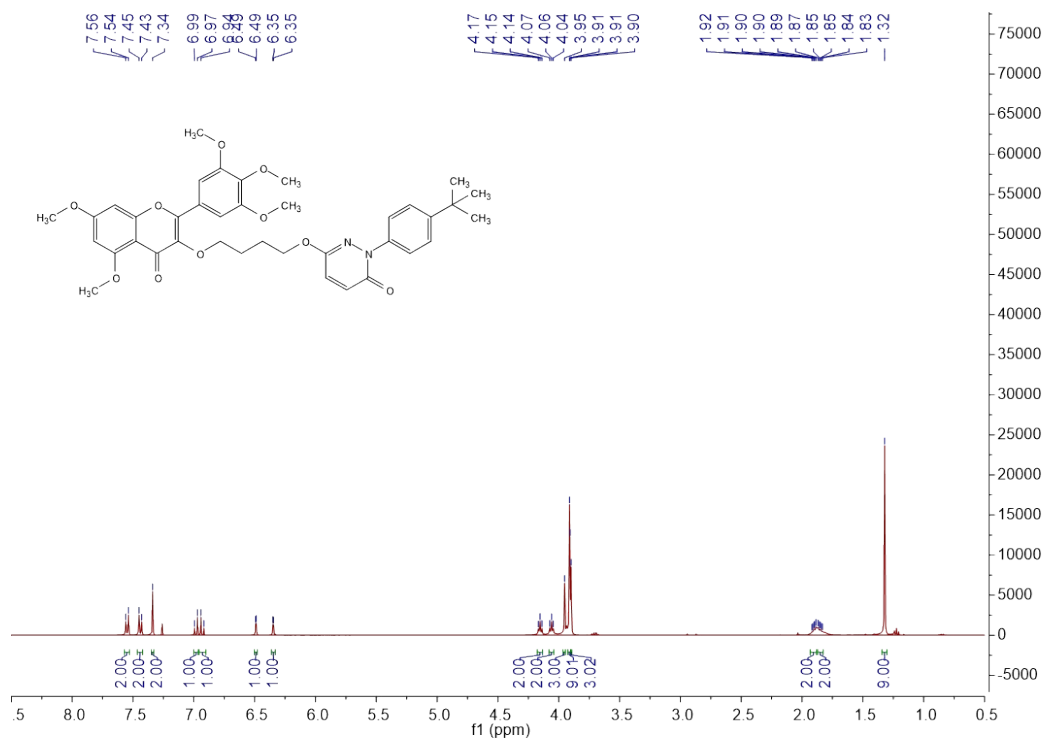

254

255

**Fig. 66** <sup>1</sup>H NMR spectrum of A21

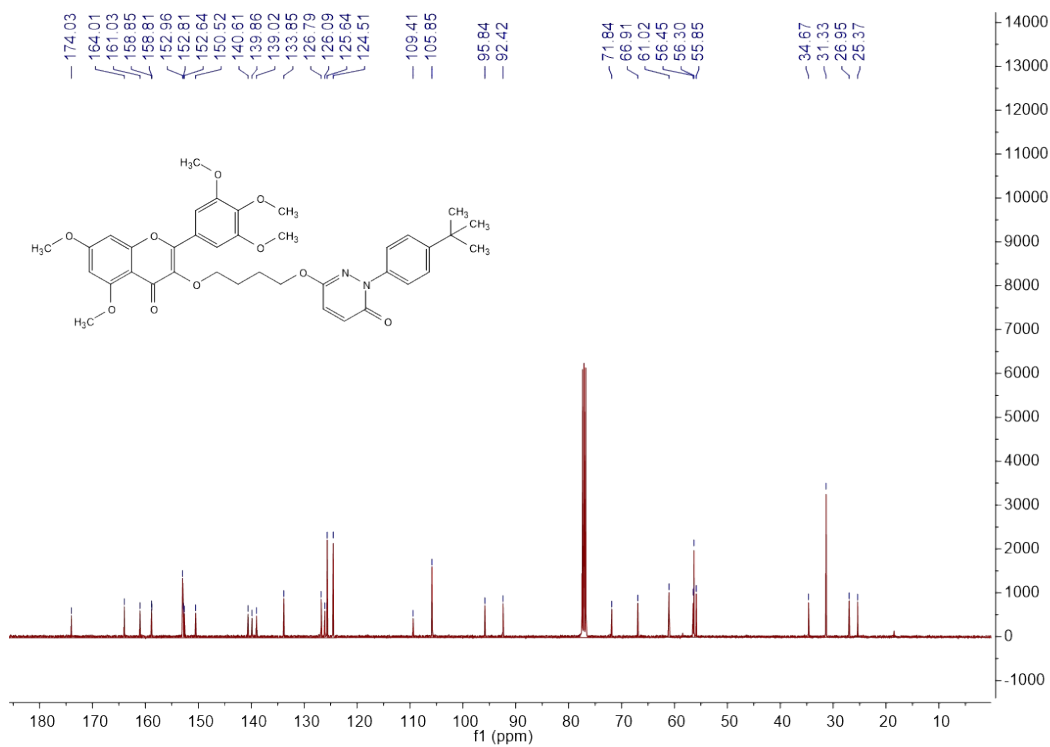

256

257

**Fig. 67** <sup>13</sup>C NMR spectrum of A21

88 #89 RT: 0.67 AV: 1 NL: 4.82E+007  
T: FTMS + p ESI Full ms [100.0000-1300.0000]

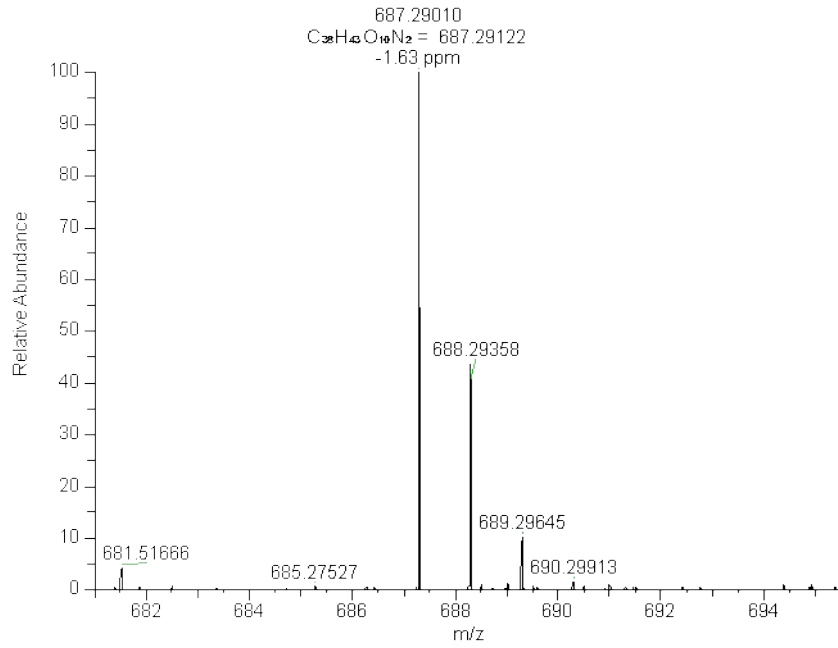

258

259

Fig. 68 HRMS spectrum of A21

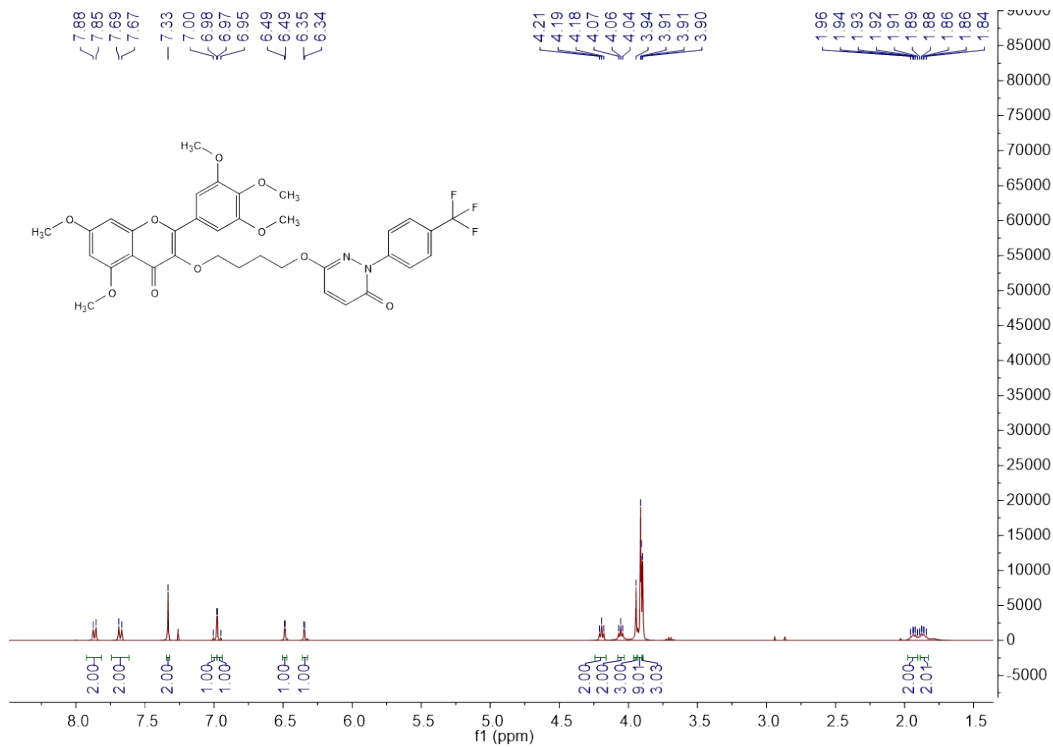

260

261

Fig. 69  $^1H$  NMR spectrum of A22



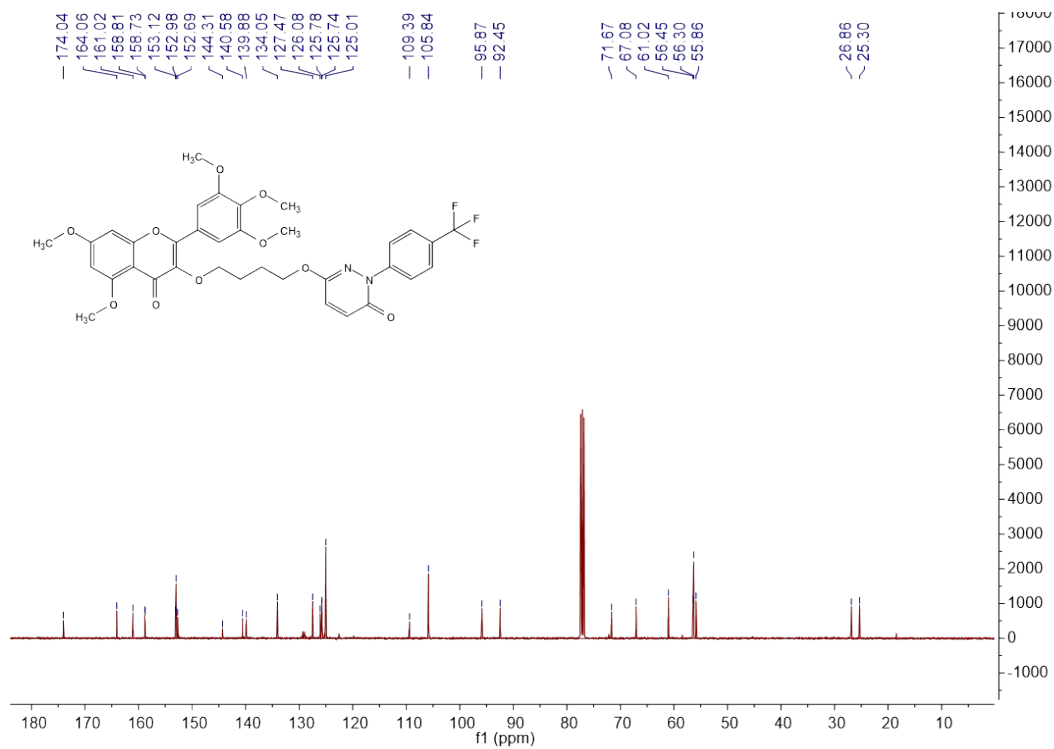

262

263

**Fig. 70** <sup>13</sup>C NMR spectrum of A22

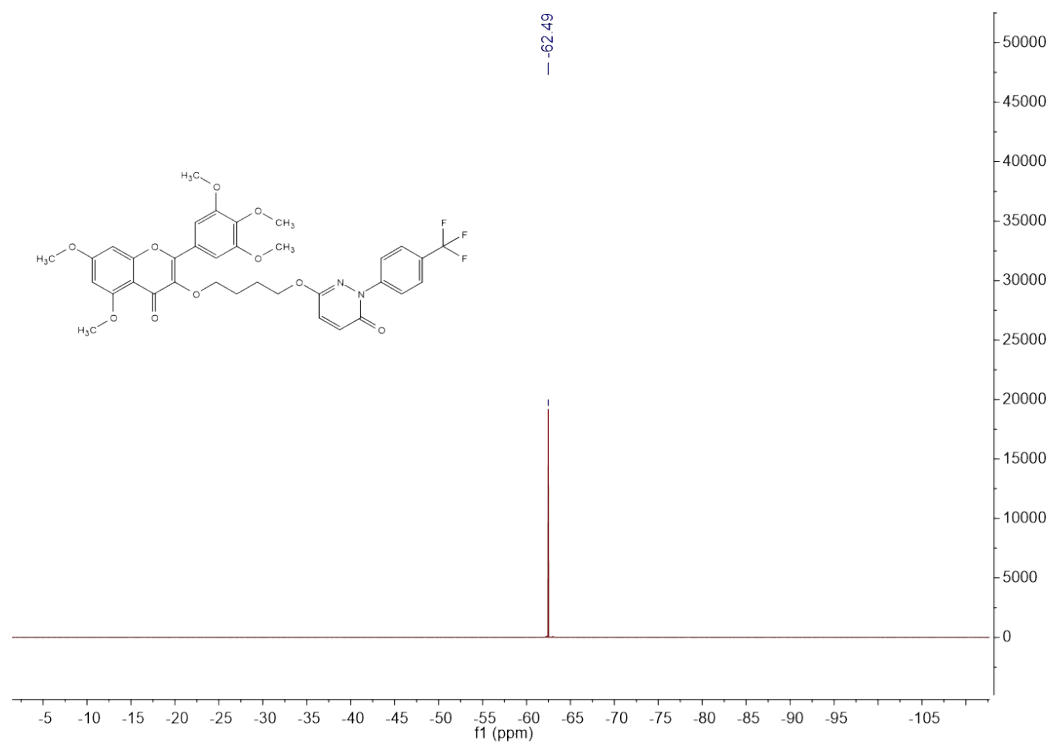

264

265

**Fig. 71** <sup>19</sup>F NMR spectrum of A22

89 #55 RT: 0.54 AV: 1 NL: 1.79E+07  
T: FTMS + p ESI Full ms [100.0000-1300.0000]

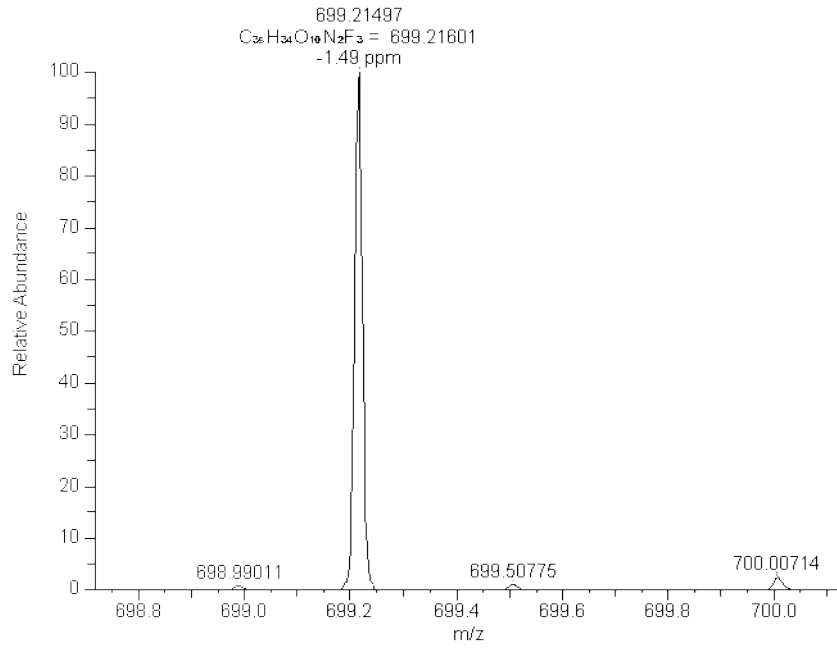

266

267

Fig. 72 HRMS spectrum of A22

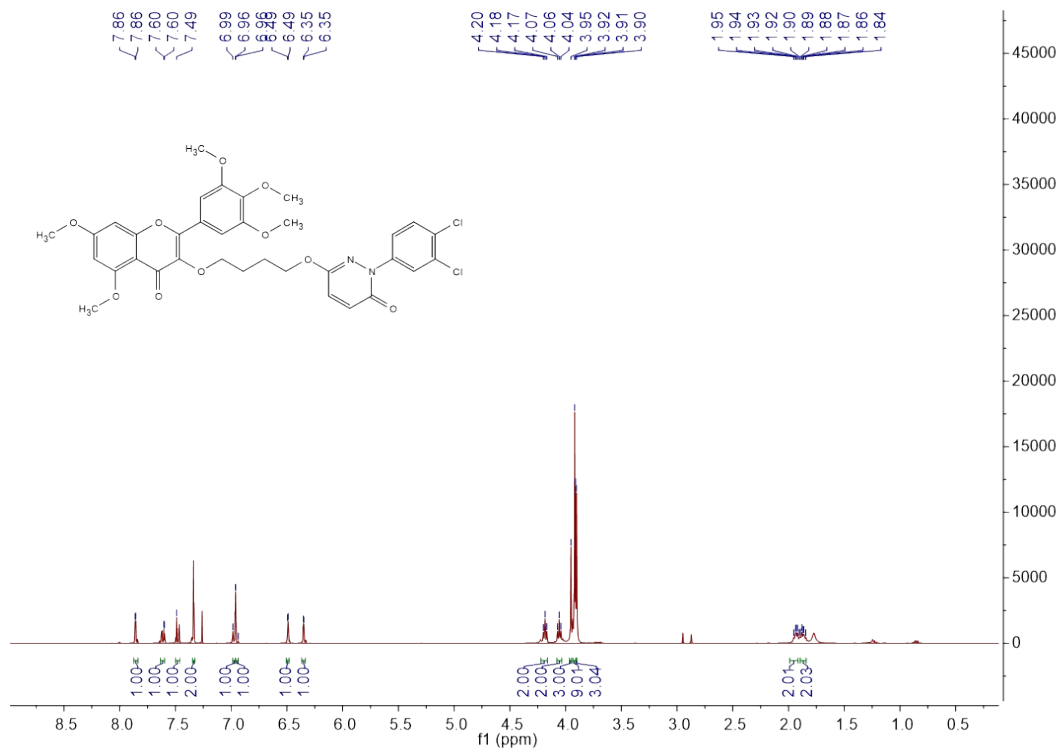

268

269

Fig. 73  $^1H$  NMR spectrum of A23

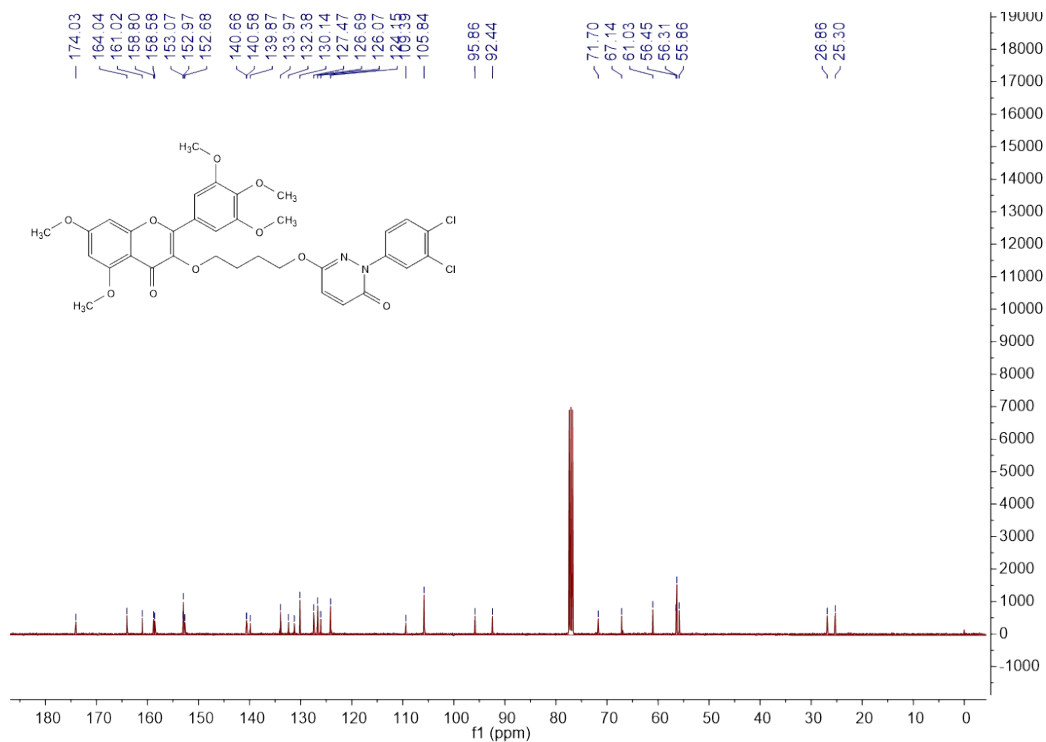

270

271

**Fig. 74** <sup>13</sup>C NMR spectrum of A23

90 #59 RT: 0.57 A/: 1 NL: 9.34E+005  
T: FTMS + p ESI Full ms [100.0000-1300.0000]

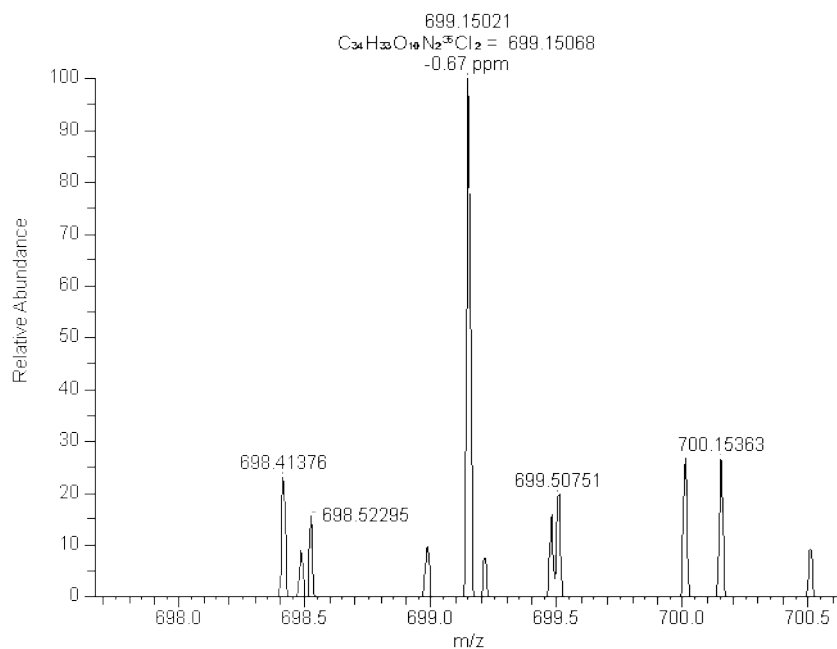

272

273

**Fig. 75** HRMS spectrum of A23

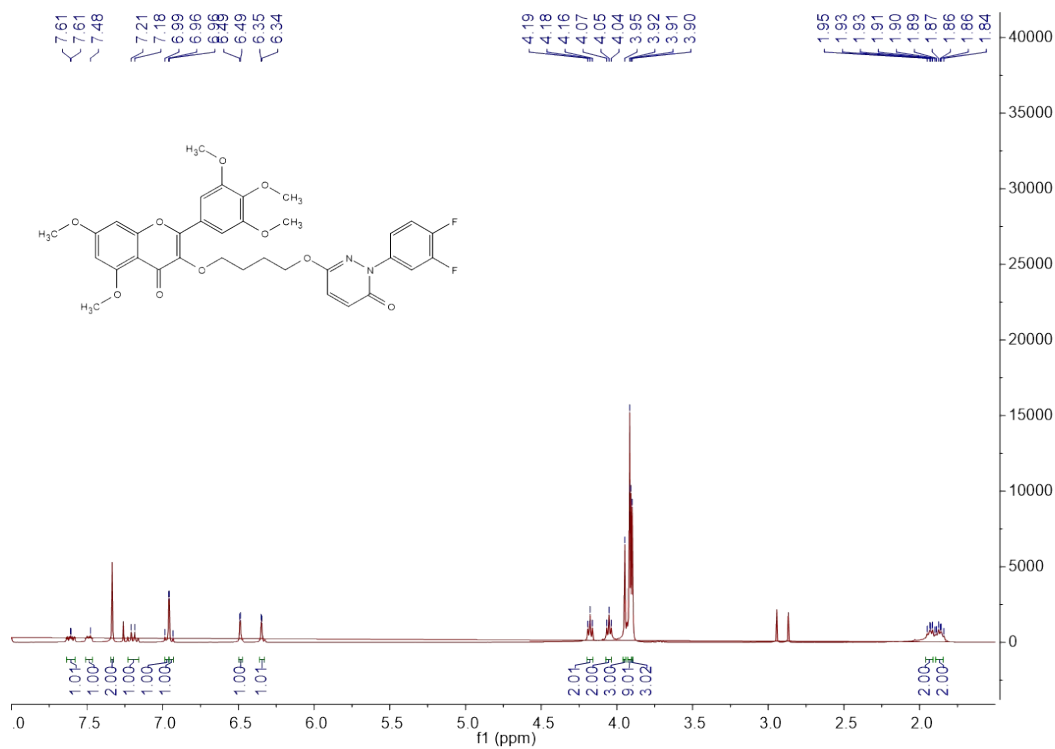

274

275

Fig. 76 <sup>1</sup>H NMR spectrum of A24

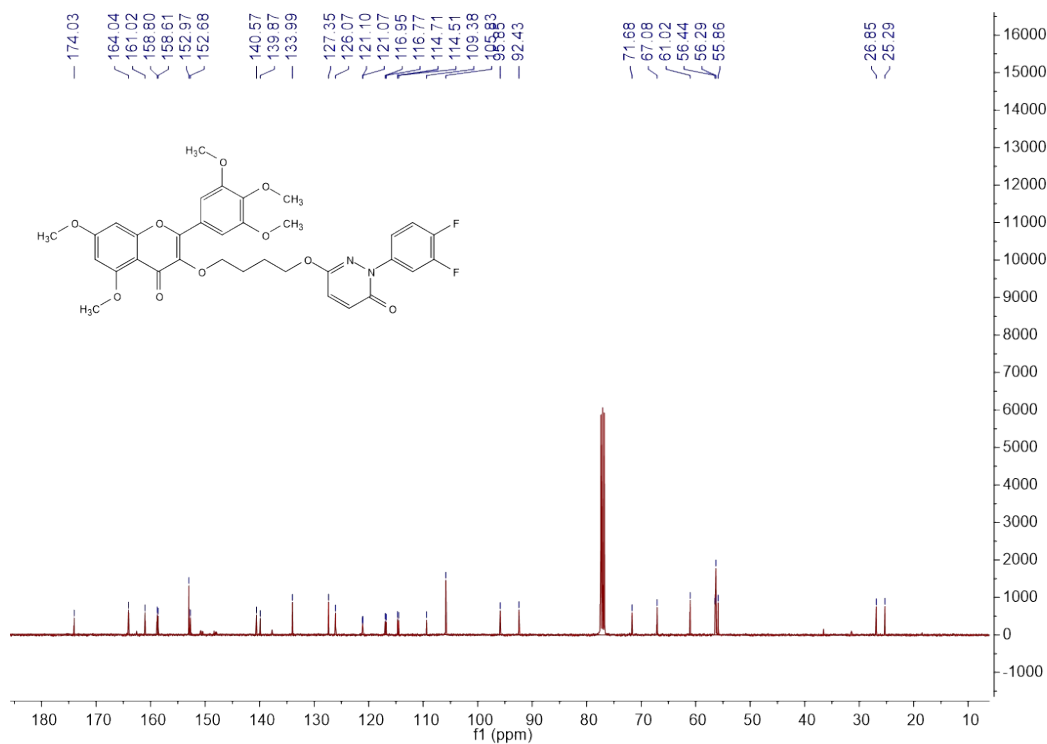

276

277

Fig. 77 <sup>13</sup>C NMR spectrum of A24

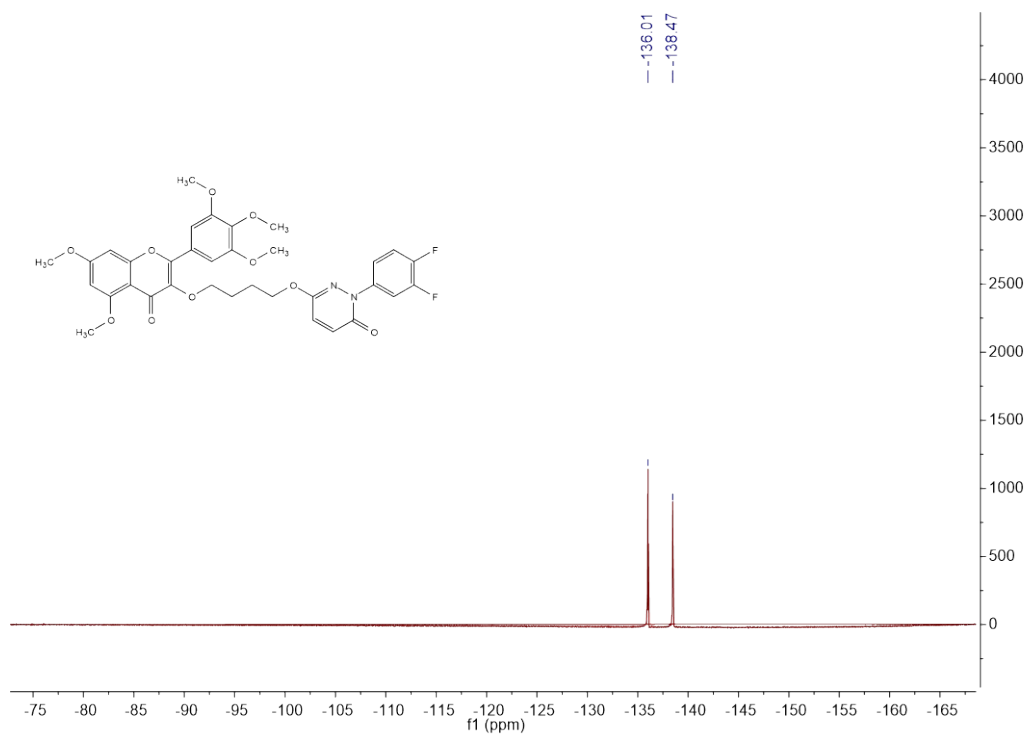

278

279

**Fig. 78**  $^{19}\text{F}$  NMR spectrum of A24

67 #47 RT: 0.45 A/: 1 NL: 7.97E+007  
T: FTMS + p ESI Full ms [100.0000-1300.0000]

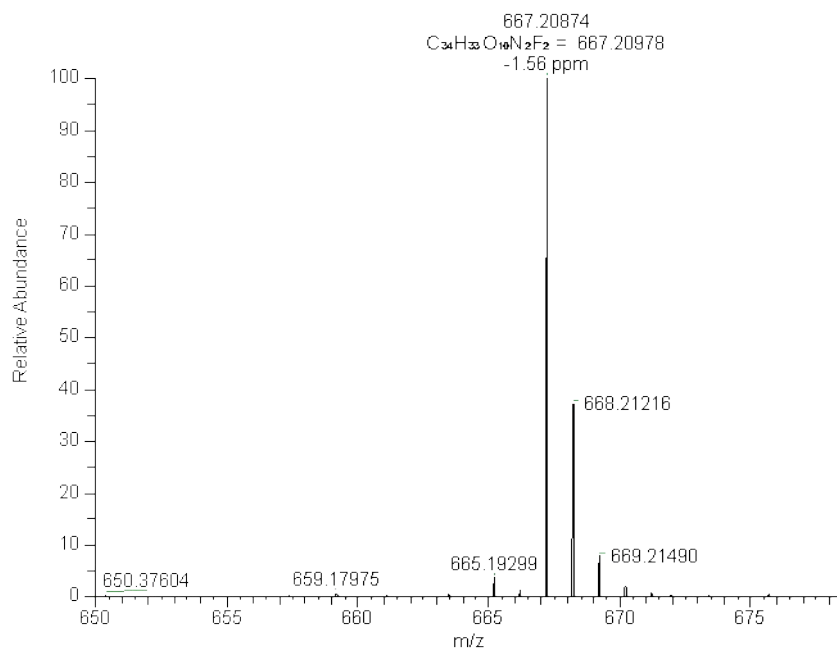

280

281

**Fig. 79** HRMS spectrum of A24

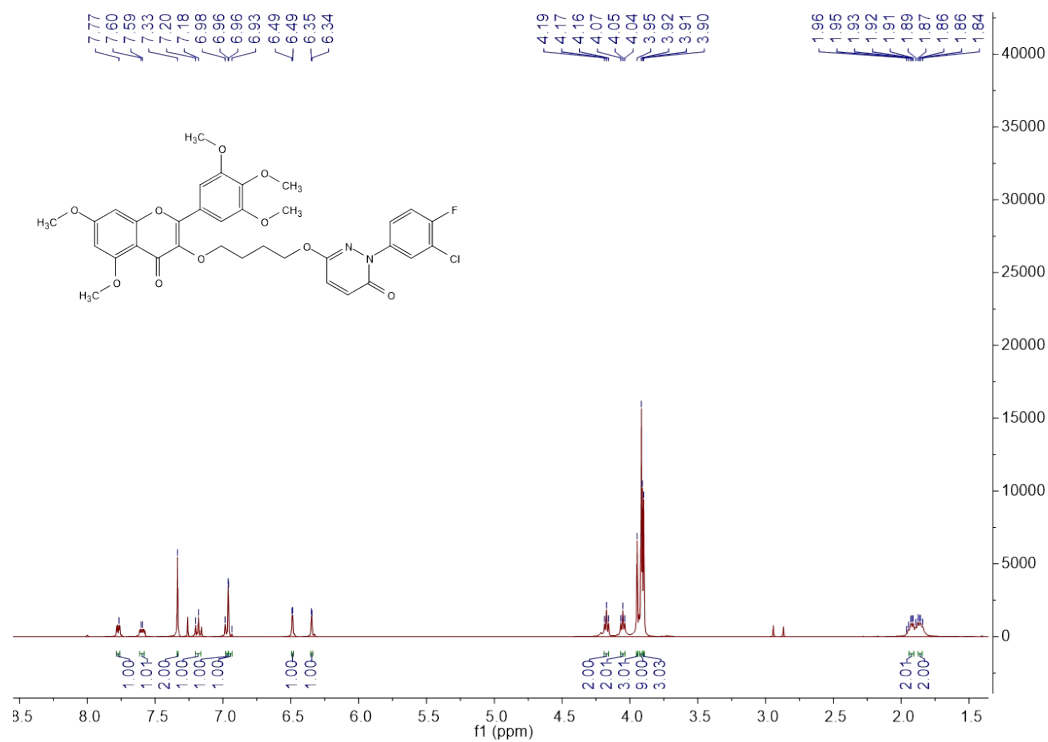

282

283

Fig. 80 <sup>1</sup>H NMR spectrum of A25

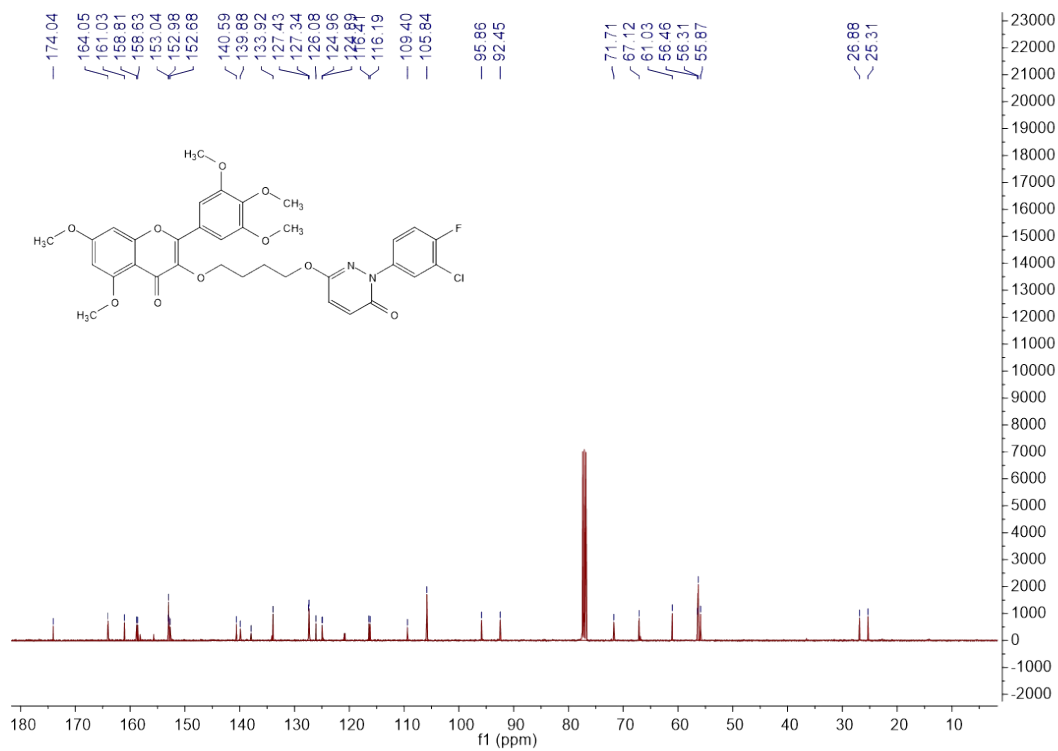

284

285

Fig. 81 <sup>13</sup>C NMR spectrum of A25

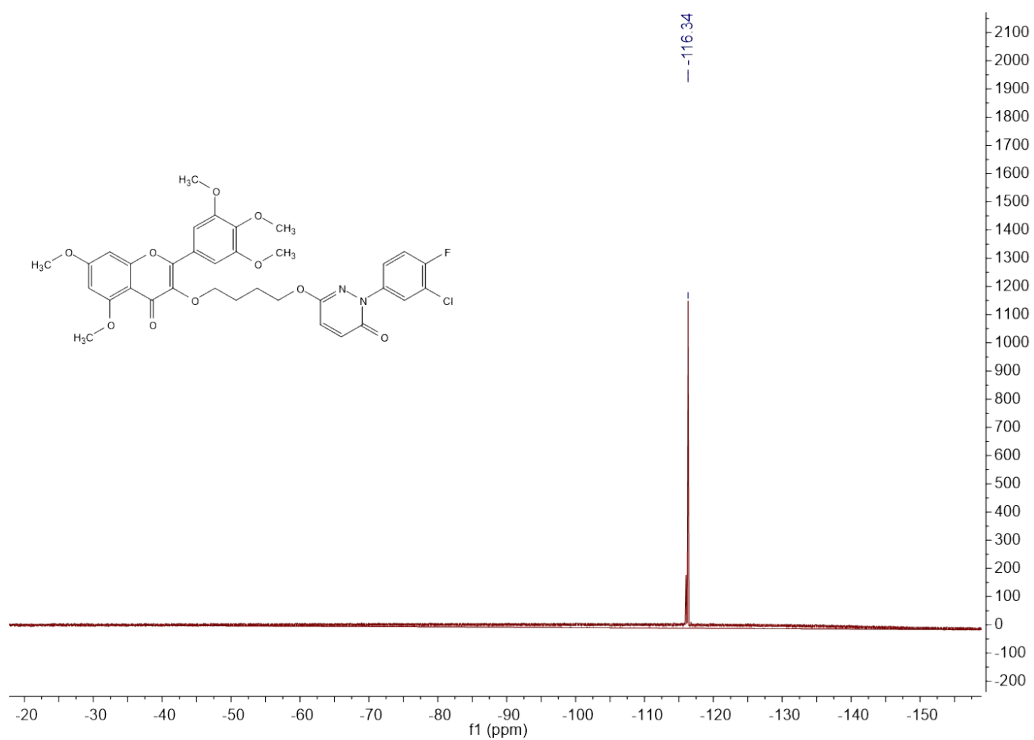

286

287

**Fig. 82**  $^{19}\text{F}$  NMR spectrum of A25

91 #49 RT: 0.48 A/: 1 NL: 9.89E+005  
T: FTMS + p ESI Full ms [100.0000-1300.0000]

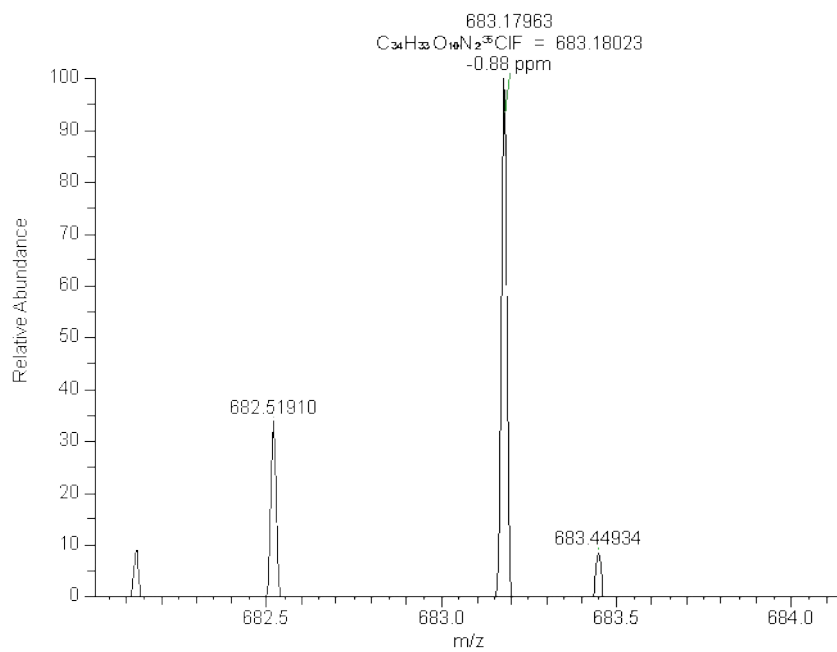

288

289

**Fig. 83** HRMS spectrum of A25

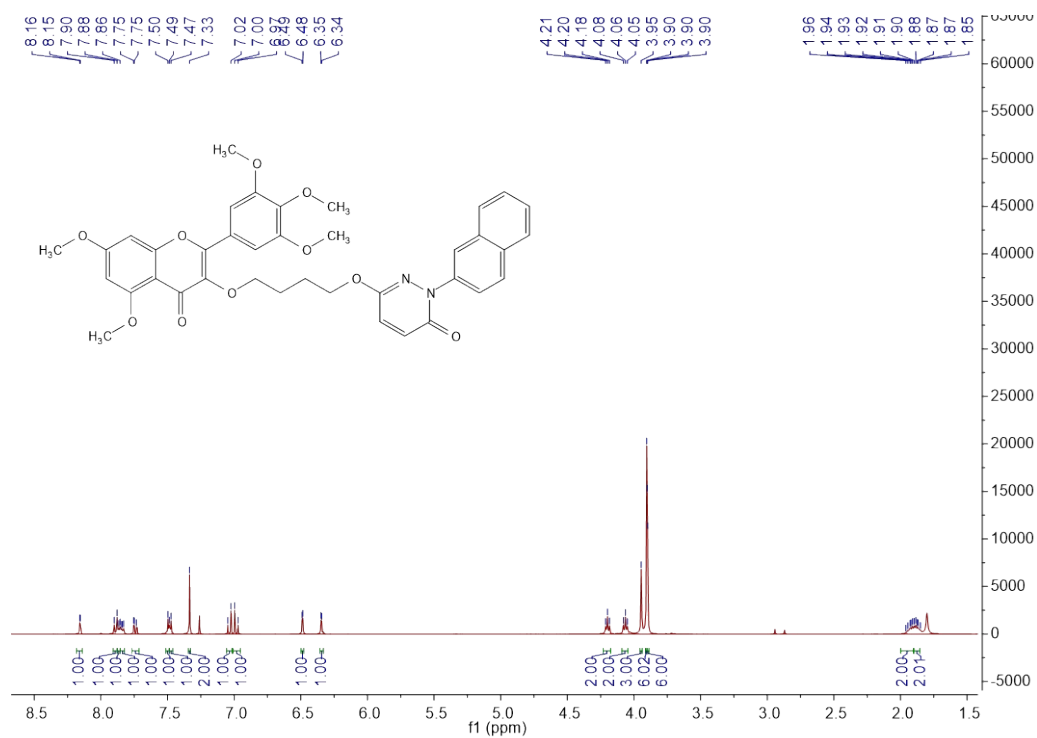

290

291

Fig. 84 <sup>1</sup>H NMR spectrum of A26

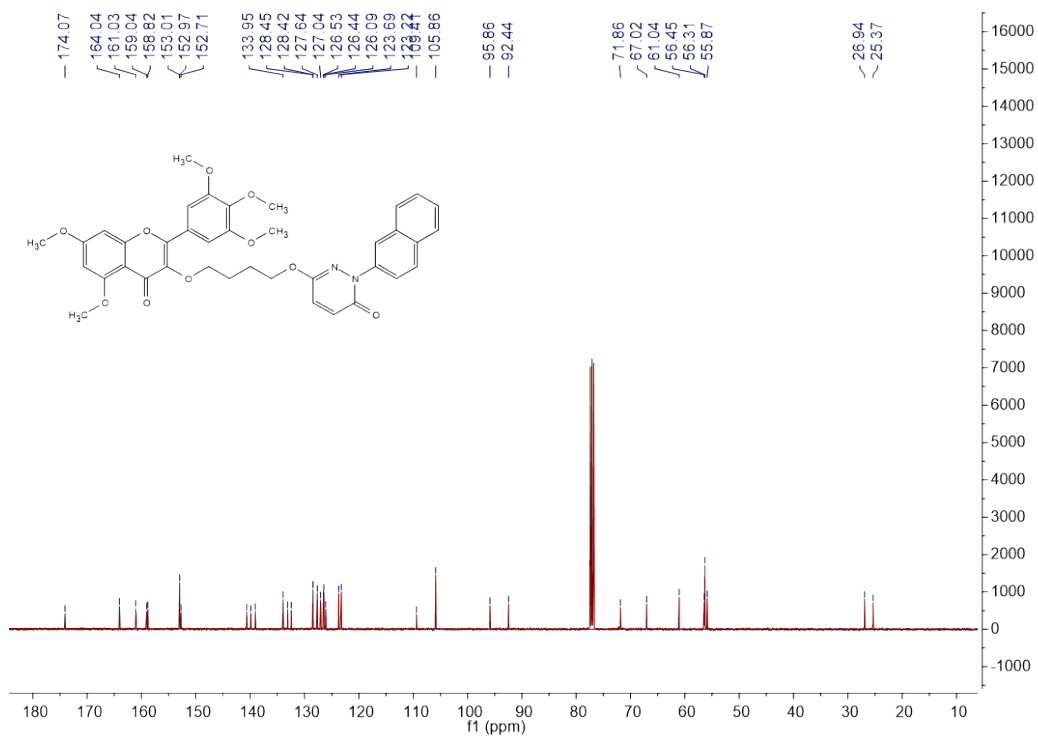

292

293

Fig. 85 <sup>13</sup>C NMR spectrum of A26



66 #53 RT: 0.51 AV: 1 NL: 4.35E+007  
T: FTMS + p ESI Full ms [100.0000-1300.0000]

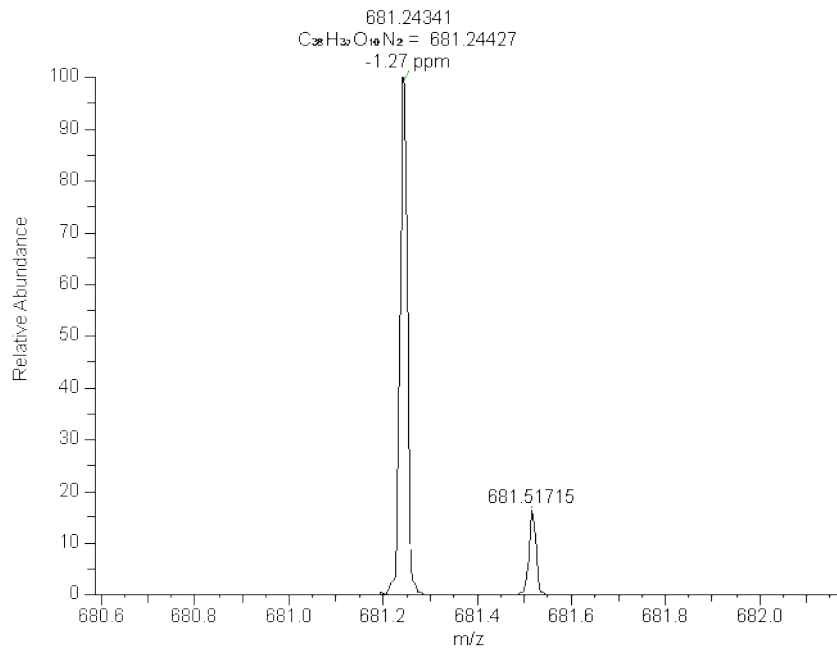

294

295

**Fig. 86** HRMS spectrum of **A26**
